# Supplementary material for: Climate and Species Richness Predict the Phylogenetic Structure of African Mammal Communities
Source: PLoS One. 2015 Apr 15;10(4):e0121808. doi: 10.1371/journal.pone.0121808 (PMC4398448; doi:10.1371/journal.pone.0121808)
Supplement: S1 Dataset — (XLSX) [file pone.0121808.s001.xlsx]

## Sheet: Mammal NTI NRI
plot	ntaxa	NRI	NTI	LAT	LONG	alt	bio_1	bio_2	bio_3	bio_4	bio_5	bio_6	bio_7	bio_8	bio_9	bio_10	bio_11	bio_12	bio_13	bio_14	bio_15	bio_16	bio_17	bio_18	bio_19
ABER	42	-0.7933	-1.1382	-0.24	36.5	2368	14.1	14.5	8.1	658	23.4	5.5	17.9	14.4	14.1	14.9	13.2	922	125	31	38	304	116	218	266
ABI-SHA	32	1.77	1.3452	7.3	38.3	1878	18.6	14.4	7.5	768	27.6	8.4	19.2	17.9	18	19.6	17.9	976	145	14	55	394	65	197	108
ABTL	34	-0.3827	-0.8856	12.1	18.88	724	27.4	14.7	6.1	2427	39.4	15.4	24	25.5	25.3	30.9	25.2	682	227	0	130	516	0	51	1
ADX	17	0.9657	1.0569	19.31	9.37	654	26.2	15.6	4.9	5568	40.4	8.9	31.5	31.9	20	32.1	18.2	27	11	0	116	23	0	13	0
AIHS	29	-0.2298	0.318	-27.91	17.15	826	17.1	13.4	5.7	3633	28.4	4.9	23.5	20	14.8	21.4	12.2	84	15	3	40	35	12	21	19
AKA	73	-1.8789	0.3643	-1.65	30.69	1341	20.9	11.7	8.7	276	27.7	14.3	13.4	20.9	20.8	21.2	20.6	967	169	6	56	382	48	191	314
AMB	46	1.5856	-2.0145	-2.38	37.14	1196	21.4	12.1	7.2	1363	30.3	13.6	16.7	22.2	19.6	22.8	19.3	604	124	2	79	263	10	262	15
ANG	58	2.2512	-1.4873	-15.5	15.3	1197	22.3	15.9	6	2811	33.7	7.4	26.3	23.9	18.2	25	18	709	159	0	101	442	0	209	0
ANME	27	-0.4369	-0.2883	15.55	1.7	331	29.2	14.5	5.7	3146	40.7	15.3	25.4	30.2	26	32.8	24.5	231	98	0	154	200	0	27	0
APFR	45	0.7761	-0.2317	11.39	1.16	201	28.4	13.3	6.4	1833	39.1	18.6	20.5	26.5	27.7	31.1	26.5	872	227	0	110	585	1	123	585
ARAW	25	1.4628	1.0201	-1.43	40.15	90	27.3	10.9	7.1	1304	35	19.8	15.2	27.6	25.5	28.8	25.5	477	90	13	55	181	67	76	67
ARU	40	-1.9411	-1.7061	-3.25	36.83	2231	14.6	10.2	6.6	1428	22.6	7.3	15.3	15.3	12.7	16.1	12.5	1358	334	14	82	701	48	375	61
ATFR	45	0.7078	-0.2555	11.56	1.44	186	28.5	13.5	6.3	1960	39.3	18.2	21.1	26.7	27.4	31.5	26.7	860	226	0	111	580	1	118	580
ATNR	23	1.3655	0.6476	18.83	9.47	990	24.4	15.7	5	5425	38.6	7.4	31.2	29.9	18.4	30.2	16.6	41	17	0	132	34	0	19	0
AWA	44	2.84	1.4959	9.2	40.2	823	26.1	15.4	6.6	2098	37.1	13.8	23.3	27.1	24	28.5	23.1	542	128	6	71	261	38	158	39
BAD	48	1.4281	0.3175	12.34	-13.17	74	27.6	13.4	5.7	2213	39	15.7	23.3	26.6	27	30.8	25.1	1386	378	0	116	974	0	63	20
BAIE	10	-0.2021	0.1068	28.01	-12.27	5	19.9	8	5.4	2161	26.9	12.3	14.6	18	21.1	22.5	16.9	55	14	0	92	34	0	3	29
BALE	29	0.6047	2.0799	6.4	39.4	1950	18.3	15	7.7	716	27.7	8.4	19.3	18.2	17.7	19.2	17.3	1098	169	19	56	407	80	404	93
BAN	61	0.9974	-2.5463	-11.53	30.72	1213	20.6	12.1	5.7	2220	30.9	9.7	21.2	21.7	17.3	23	17.3	1238	292	0	114	835	0	423	0
BANC	9	0.4233	0.8732	20.23	-16.11	29	24.2	12.1	5.9	2758	34.1	13.8	20.3	27.6	23.1	27.6	20.5	33	10	0	110	23	0	23	5
BASA	48	0.8631	-0.2556	10.59	19.42	438	27.7	15.1	6.3	2057	39.4	15.6	23.8	26	26.3	30.9	26	871	250	0	116	605	1	93	2
BAZ	37	-0.6666	-0.0046	-21.75	35.43	8	23.7	9.4	5.4	2585	31.2	13.8	17.4	26.7	20.6	26.7	20.1	864	166	16	78	481	60	481	73
BBN	52	-1.3943	2.0977	2.51	14.72	615	23.4	11.2	8.4	565	30.4	17.1	13.3	23.3	23.3	24.2	22.7	1621	241	43	45	614	172	504	438
BELZ	10	0.2029	-0.1024	35.59	6.04	1520	11.1	12.6	3.8	6994	30.6	-2.4	33	3.9	20.5	20.5	2.7	485	57	11	34	157	58	58	147
BEN	50	0.8133	0.2087	8.36	13.82	398	26.1	12.9	6.1	1747	36.3	15.4	20.9	25	24.8	28.8	24.6	1288	274	0	97	779	0	226	3
BF	52	-2.2468	0.4506	-3.94	29.6	1992	16.3	10.8	7.2	671	23.3	8.5	14.8	16.6	15.3	16.9	15.3	1459	225	4	65	605	31	349	115
BHINE	57	0.8449	-1.0137	-22.9	32.86	102	24.6	13.9	6.1	3037	34.2	11.7	22.5	27.7	21.6	27.7	20.2	477	102	2	95	296	11	296	15
BIK	57	1.1083	-1.1371	-15.28	14.76	1254	21.1	15	6	2761	32	7.2	24.8	22.8	17	23.7	17	778	187	0	100	468	0	243	0
BIN	45	0.6459	0.4174	9.63	14.41	257	28.2	12.7	6	2159	39.3	18.4	20.9	26.1	27	31.5	26.1	827	219	0	112	562	0	109	562
BON	42	0.4064	-0.0983	10.86	-3.11	270	27.8	12.5	6.5	1652	37.5	18.4	19.1	26	27.3	30.2	26	980	259	1	104	629	5	156	629
BOUH	15	0.0733	0.2162	34.47	9.61	302	18.1	12.5	3.9	6520	35.3	4	31.3	9.8	26.3	26.4	9.8	186	22	2	44	65	13	26	65
BUD	13	-1.2024	-0.3221	1.73	31.55	1098	23	11.9	8	788	31.1	16.4	14.7	22.1	23.7	24	21.9	1361	180	33	42	462	129	188	397
BUF	46	0.4281	0.664	-12.78	13.81	882	22.1	10.1	6.6	1553	28.5	13.4	15.1	23.4	19.6	23.4	19.6	985	276	0	99	542	1	542	1
CHAM	17	0.4336	0.3877	35.18	8.71	922	15.7	13	3.8	7151	35.4	1.3	34.1	13.9	25.1	25.1	6.8	351	40	10	27	111	51	51	92
CHO	56	1.838	-1.462	-18	24.5	931	22.1	16.2	5.5	3532	35.2	5.9	29.3	24.5	16.9	25.6	16.9	588	145	0	110	405	1	209	1
CLB	30	-0.519	0.0036	14.41	-3.4	504	26.3	13.9	5.5	2946	38.3	13.1	25.2	26.2	22.2	30.2	22.2	518	170	0	130	403	0	89	0
CMA	53	-1.578	1.624	2.46	10.3	671	22.3	8.1	7.8	725	27.6	17.3	10.3	21.9	22.8	23	21.2	2252	392	55	57	945	236	544	519
COM	66	-1.8408	-2.0805	9.06	3.42	398	26.1	12.1	6.6	1459	35.7	17.5	18.2	24.2	26.4	28.1	24.2	1157	226	5	77	557	21	146	557
CON	54	-1.3889	1.4531	-3.9	11.45	56	25.6	7.9	5.8	1630	31.9	18.5	13.4	27.2	23.1	27.2	23.1	1382	243	0	77	612	3	612	3
CONG	53	-0.9951	-0.2705	2.5	22	389	25.3	10.1	8.1	574	32.1	19.7	12.4	24.7	25.4	26.1	24.5	1715	232	58	38	608	188	345	548
CROS	40	-2.3468	-0.5118	5	6	22	26.6	7.8	7.5	940	32.2	21.9	10.3	25.3	27.1	27.8	25.3	3097	490	43	62	1276	169	450	1276
DEUX	43	0.4866	-0.1617	11.59	-2.97	276	27.9	13.4	6.2	2031	38.2	16.8	21.4	26.3	26.3	30.9	25.9	891	248	1	108	594	5	126	9
DIAW	28	-0.3563	0.176	16.31	-16.4	5	25.5	11.7	6.1	2242	33.8	14.9	18.9	28.1	24.1	28.4	22.7	219	84	0	153	192	0	176	4
DJU	16	-0.143	-0.6552	36.46	4.16	1429	12.1	10.4	3.4	6915	30.1	-0.3	30.4	5.3	21.3	21.7	4.1	988	141	8	56	416	52	69	382
DVGP	33	0.4323	-1.5403	-22.53	16.96	1595	19.6	16.9	6	3659	32.3	4.4	27.9	22.7	14.4	23.5	14.4	352	88	0	107	244	3	129	3
ELB	20	0.4863	1.2152	22.9	35.75	1	26.2	11.9	5.1	4106	37.5	14.4	23.1	24.9	21	31	20.7	15	10	0	137	14	0	0	2
ENIG	34	-2.5013	-0.6059	5	7.5	51	26.4	8.3	7.6	858	32.3	21.4	10.9	25.2	26.9	27.5	25.2	2557	402	28	61	1114	131	392	1114
ETO	47	0.0844	-2.1695	-19	15.75	1116	22.3	16.8	5.9	3667	34.5	6.4	28.1	24.9	17	26	17	382	99	0	112	264	1	167	1
FADA	21	-0.3016	0.7879	16.96	21.4	579	27.9	15.5	5.9	3398	40.2	14.3	25.9	30	24.2	31.4	22.7	72	42	0	169	65	0	24	0
GAD	24	-1.2171	0.2007	15.14	7.15	451	27.9	14.8	5.5	3436	40.3	13.7	26.6	28.6	25	32.2	23	285	110	0	155	245	0	38	0
GAM	44	1.5999	0.9629	8	34	419	27.1	14.3	7.3	1287	38.3	18.9	19.4	25.5	27.6	29	25.5	1020	196	3	79	522	17	88	522
GAR	71	-1.4928	0.4847	4.19	29.48	803	24.3	12.2	7.7	1021	33.2	17.5	15.7	23.3	25.3	25.7	23.1	1558	232	19	57	623	76	142	621
GEM	37	1.2774	-0.9373	-25.7	20.4	965	20	18.8	5.3	5833	35.4	0.2	35.2	26.2	12	26.9	12	230	48	1	89	136	4	108	4
GHO	66	1.447	-0.6557	-21.66	31.86	402	22.9	13.7	6.2	2959	32.3	10.3	22	26	18.6	26	18.6	581	117	4	90	345	20	345	20
GILE	53	0.3682	-1.0394	-16.53	38.44	120	25.2	10.2	6	2329	33.1	16.3	16.8	27.2	24.3	27.4	21.7	1277	265	12	84	733	48	499	113
GISH	72	-2.265	1.1698	-1.75	29.42	2599	13.8	9.8	9	227	19.4	8.6	10.8	13.6	13.7	14	13.5	1658	236	26	43	603	139	365	466
GOLD	33	0.1331	-1.6931	-28.3	28.4	1689	14.1	15.4	5.5	4443	26.2	-1.8	28	18.5	7.9	19.1	7.9	718	116	10	62	316	40	312	40
GOMB	65	-0.9928	1.9274	-4.66	29.63	1089	22	9.7	7	568	28.7	15	13.7	22	21.5	22.8	21.5	1187	200	2	72	511	15	105	88
GOR	56	1.3091	-0.195	-18.83	34.51	25	25.2	13	6.2	2664	34.7	13.9	20.8	27.7	22.4	27.7	21.2	1064	219	13	87	615	57	513	71
GUS	58	-0.4546	-2.792	7.5	7.5	345	25.4	10.2	6.7	1309	33.3	18.2	15.1	23.9	25.6	27.3	23.9	1358	280	7	76	631	30	170	631
HAD	27	1.1555	0.4832	11.6	40	1004	24.2	14.8	6.7	1781	36.1	14.2	21.9	25.1	23	26.5	21.9	638	159	15	84	336	51	187	73
HLU	56	0.4406	-1.1389	-28.2	31.5	542	19.7	11.5	6.2	2401	28.1	9.6	18.5	21.9	16.7	22.5	16.4	841	123	18	55	347	64	345	65
HWA	61	1.624	-0.3775	-19.19	26.62	1027	21.2	15.7	5.5	3472	33.7	5.5	28.2	23.5	16.1	24.7	16.1	532	135	0	108	361	1	195	5
ILES	46	-0.6739	0.4972	10.95	-14.95	9	27.9	10.9	6.2	1193	36.6	19.1	17.5	26.9	27.6	29.6	26.7	2705	874	0	129	2031	0	46	5
IONA	49	0.8592	-2.5168	-16.5	12.54	467	20.4	9.1	6.1	2039	26.7	12	14.7	22.4	18.3	22.5	17.4	119	35	0	123	90	0	75	0
ITG	35	2.3476	0.9727	-8.4	29.2	1053	23.3	11.6	6.5	1268	31.3	13.6	17.7	23.7	21.5	24.6	21.5	1070	201	0	88	536	0	194	20
KAB	42	0.7958	0.1548	11.5	-1.25	264	27.9	12.7	6.2	1884	38.2	17.8	20.4	26	26.9	30.8	26	872	238	1	107	575	7	128	575
KAFF	38	4.472	0.9777	-15.5	25.4	1130	20.9	15.2	5.4	3186	33.2	5.4	27.8	23	16.1	23.9	16.1	861	211	0	114	603	0	336	0
KAK	19	0.3647	1.4252	0.3	34.85	1568	20.1	16.6	8.7	678	29.8	10.9	18.9	20	20.6	20.9	19.2	1910	258	62	37	693	248	505	565
KALT	15	-0.507	-0.3187	-25.62	20.43	969	20.1	18.8	5.3	5808	35.4	0.4	35	26.3	12.1	26.9	12.1	233	48	1	89	136	5	108	5
KAM	57	1.3737	-1.3244	-11.85	21.67	1092	20.7	16.4	6.7	1742	31.5	7.3	24.2	21.7	18	22.1	18	1273	228	0	88	653	2	270	2
KANG	50	0.3976	-0.1467	-9.81	16.77	1131	20.9	14	7	763	29.8	9.9	19.9	21.1	19.8	21.4	19.8	1212	211	0	76	511	7	392	22
KAP	51	1.4297	-2.6639	-24.3	31	512	21.7	13.1	5.7	3240	31.4	8.6	22.8	25.4	17.1	25.4	17.1	528	110	5	82	296	17	296	17
KAS	61	0.9483	-0.2797	-12.56	33.84	1201	19.9	10.7	5.9	2126	27.7	9.7	18	21.4	17.7	22	16.6	1077	245	1	109	686	5	283	8
KBIR	70	-2.4208	0.9123	-3.6	29.32	697	24.9	10.2	7.3	512	31.9	18	13.9	24.8	24.4	25.5	24.3	958	149	4	64	403	28	110	100
KFAL	44	-0.8438	-0.5959	2.25	31.8	840	24.4	12.2	7.6	898	32.9	17	15.9	23.3	25.1	25.5	23.3	1217	153	25	43	436	106	156	436
KFNP	56	0.9318	-1.389	-14.4	26.13	1098	20.9	14.7	5.6	2732	32.6	6.5	26.1	22.5	16.9	23.4	16.8	975	234	0	110	658	0	155	3
KHA	47	0.9082	-0.8728	-18.75	20.76	1094	21.8	15.8	5.6	3641	34	5.9	28.1	24.6	16.4	25.3	16.4	526	139	0	110	345	0	156	0
KIB	79	-1.8998	0.6215	0.53	30.38	1440	19.9	12	8.5	377	27.3	13.3	14	19.7	20.1	20.4	19.5	1356	200	49	44	534	193	338	227
KID	44	1.2584	0.0002	3.53	33.5	1106	23.4	12.5	7.6	1163	32.7	16.4	16.3	22	24.5	25.1	22	892	137	12	57	374	52	93	374
KILI	19	-1.0723	-0.0205	-3	37.5	2690	12.1	10	6.7	1352	19.8	5	14.8	13	10.2	13.6	10.2	1301	253	12	81	558	41	382	41
KIS	42	0.0998	0.1052	-9.77	13.62	200	24	6.9	5.3	2162	29.9	16.9	13	26.1	20.8	26.1	20.8	803	232	0	111	503	0	503	0
KIZ	72	1.4187	0.5421	-6.37	34.28	1311	21.6	12.2	7	1296	29.8	12.4	17.4	22.4	19.6	23	19.6	601	141	0	111	387	0	167	0
KNYS	17	-1.3578	0.149	-33.5	22.6	502	15.9	13.3	5.6	3476	27.6	4.2	23.4	16.5	11.3	20.2	11.3	421	44	26	13	120	91	110	91
KOR	49	-1.6617	2.2902	5.1	8.51	74	26.2	8.4	7.9	712	32.2	21.6	10.6	25.3	26.3	27.2	25.3	2746	418	30	60	1174	127	416	1174
KOU	45	0.7092	-0.2326	11.55	1.95	213	28.3	13.4	6.2	2062	39.2	17.6	21.6	26.6	27	31.5	26.5	880	238	0	112	598	1	117	2
LACA	12	0.0687	-0.502	33.33	-5.17	1886	10.4	14.5	4	6524	30.6	-5	35.6	6.7	19.2	19.3	2.5	811	115	10	53	302	51	55	289
LACF	28	-0.4981	0.7939	12.79	17.44	289	29.4	15.9	5.7	3020	42.4	14.6	27.8	28.7	27.5	33.5	25.6	417	163	0	148	347	0	59	0
LACO	13	0.0252	-1.0142	36.84	8.39	29	18.3	10.3	4.1	5216	32.3	7.5	24.8	13.4	24.8	25.4	12	727	136	2	67	345	21	46	331
LACT	11	-0.5561	-0.8551	36.86	8.5	19	18.4	10.3	4.1	5220	32.4	7.5	24.9	13.5	24.8	25.4	12.1	724	134	2	67	343	21	46	330
LCHIL	58	1.3859	-0.5762	-15.16	35.41	951	21.2	10.3	5.7	2221	29.7	11.9	17.8	22.7	19.1	23.6	17.9	1212	270	6	103	775	20	378	21
LEF	49	-0.43	1.6104	-2.96	15.42	628	23.6	9.9	7.5	782	29.8	16.6	13.2	24.5	22.4	24.5	22.4	1828	246	10	56	674	66	674	66
LEN	55	1.5471	-0.2398	-16.16	34.45	282	25.3	11.9	5.6	2756	35.5	14.4	21.1	27.4	22.9	28.3	21.3	798	182	4	100	511	20	255	30
LIN	35	2.7618	-0.4115	-18.11	23.24	964	22	15.9	5.5	3621	34.5	5.9	28.6	24.7	16.6	25.4	16.6	559	132	0	109	376	1	191	1
LIW	34	-0.4279	-1.4754	-14.5	35.2	499	24.2	10.9	5.6	2432	33.4	14.2	19.2	25.7	20.6	26.9	20.6	846	214	2	114	588	8	239	8
LMAG	30	1.5777	-1.4661	-1.86	36.26	616	25.1	13.5	7.7	1189	34.1	16.7	17.4	25.8	23.2	26.3	23.2	475	111	4	78	240	15	233	15
LMNY	44	-0.9174	-0.7975	-3.5	35.83	957	22.2	11.6	7.1	1507	30.3	14	16.3	23.6	20.4	23.6	19.9	624	146	1	87	317	6	317	8
LNAK	45	-0.9058	-1.4521	-1	36.5	1706	18.4	13.7	7.6	1243	27.9	10.1	17.8	19.1	16.7	19.7	16.5	824	183	20	72	424	71	180	86
LNHG	34	1.5114	-0.7094	-0.88	36.3	1976	16.7	14.4	7.9	1140	26.5	8.3	18.2	17.5	15.2	18	15	686	149	23	61	323	82	256	92
LOP	52	-1.7016	2.2195	-0.16	11.85	239	25.9	9.6	7.5	929	32.2	19.5	12.7	26.1	24.4	26.7	24.4	1558	280	2	69	693	28	535	28
LTCR	51	-1.4121	2.0993	1.1	17.26	334	25.1	10.1	8.5	546	31.5	19.7	11.8	24.7	25.3	25.8	24.4	1731	196	68	31	583	250	431	454
LUA	59	0.5344	0.7189	-11.11	17.62	1174	20.9	13.8	6.3	1192	30.5	8.9	21.6	21.2	19.2	21.9	19.1	1301	224	0	80	610	4	360	18
MAD	45	0.7577	-0.242	11.37	1.27	170	28.6	13.3	6.4	1840	39.3	18.7	20.6	26.7	27.9	31.3	26.7	876	227	0	109	587	1	123	587
MAGO	50	2.7011	1.302	5.4	36.1	416	27.6	12	7.7	844	36.1	20.7	15.4	28.1	28.3	28.9	26.8	575	94	15	47	235	67	100	135
MAH	58	-1.6195	-0.2442	-18.22	21.66	1034	21.8	15.6	5.6	3460	33.9	6.2	27.7	24.4	16.6	25	16.6	562	140	0	109	367	0	170	0
MAJ	57	0.8267	-0.7242	-15.56	34.35	772	22.9	11.1	5.6	2321	32.7	13.2	19.5	24.4	20.9	25.5	19.5	1063	226	7	98	663	31	329	41
MAK	41	-0.4973	1.3619	-0.66	12.72	349	24.9	8.7	7.5	958	30.7	19.1	11.6	25.1	23.3	25.8	23.3	1658	265	5	60	679	49	564	49
MAM	55	1.7931	-1.0369	-18.41	23.68	945	22	16	5.5	3692	34.8	5.8	29	24.7	16.5	25.6	16.5	535	130	0	110	363	0	182	0
MAN	58	1.7735	0.1611	-15.98	29.44	463	24.1	13.5	5.3	3177	35.7	10.5	25.2	25.9	19.6	27.6	19.5	699	186	0	123	524	0	247	0
MAND	50	0.9445	0.5169	9.32	19.97	392	27.3	14.3	6.3	1717	38.8	16.4	22.4	25.6	26.9	29.9	25.6	1030	246	0	103	658	1	142	658
MAP	49	0.2759	-1.5171	-26.39	32.81	5	22.6	10.4	5.8	2479	30.7	13	17.7	25.5	19.8	25.5	19.2	786	127	24	50	332	94	332	95
MARE	42	0.756	-0.0754	11.59	-4.15	294	27.6	13.9	6.1	2044	38	15.4	22.6	26.4	25.5	30.6	25.5	921	248	0	109	610	3	127	7
MARO	50	0.5561	-0.3433	-18.77	35.95	3	25.2	10	6.1	2262	32.5	16.2	16.3	27.4	24.3	27.6	21.9	1095	236	16	78	587	60	570	109
MARS	51	0.8632	-1.7945	2.32	37.98	1420	19.6	15.2	8.2	924	29.2	10.7	18.5	20.5	18.4	20.8	18.4	851	235	8	93	405	39	337	41
MASF	51	-0.4358	2.3925	8.3	-9.36	900	22.2	14.8	6.9	750	32.7	11.4	21.3	21.6	21.7	23.1	21.5	2465	428	21	64	1177	128	372	210
MASM	69	0.7624	-2.0153	-1.3	35.1	1579	19.6	14.2	8.5	735	28.1	11.5	16.6	20.1	18.6	20.4	18.5	1081	172	32	42	411	140	305	149
MAT	54	0.5281	-1.1099	-16.95	28.61	986	22.2	13	5.4	2653	33.8	9.9	23.9	23.2	18.5	25.3	18.5	762	196	0	116	546	2	98	7
MATO	54	-0.0035	0.2692	-20.55	28.54	1295	18.4	14.5	5.6	3441	29.5	3.8	25.7	21.2	13.3	21.6	13.3	578	131	1	99	364	5	230	10
MAV	51	2.7287	-0.9329	-15.5	20.93	1146	20.7	16.5	6	2908	32.6	5.1	27.5	22.7	16.3	23.3	16.3	833	194	0	110	553	0	273	0
MED	51	-0.8817	0.3549	5.86	12.77	763	23.9	10.6	7.4	911	31.9	17.7	14.2	23.1	24.5	25.1	22.7	1582	282	3	74	762	24	207	713
MER	61	-0.1387	-1.9495	0.08	38.33	471	25	15.2	8.2	1010	34.4	15.9	18.5	25.4	23.6	26.2	23.6	458	150	0	124	256	0	168	0
MGSF	62	0.6639	-0.5094	8.89	21.43	474	26.7	14.5	6.3	1674	38.4	15.5	22.9	25.2	26.4	29.1	25.2	1090	238	0	97	660	2	172	660
MHA	40	-0.9557	0.5055	-6.12	29.5	760	23.9	9.8	6.4	1043	30.6	15.5	15.1	24.2	22.3	24.9	22.3	1031	188	1	79	458	9	221	9
MIKU	37	-0.5993	-2.56	-7.2	37.13	495	24.5	9.5	6.3	1705	31.4	16.5	14.9	25.6	22	26.3	22	973	197	5	80	506	27	333	27
MNDL	49	1.7505	0.3678	11.56	15.22	305	28.2	14.9	5.8	2515	40.7	15.3	25.4	27	27.1	31.7	25.3	579	185	0	129	450	0	40	0
MNIM	53	-0.3347	2.5279	7.4	-8.23	371	24.9	13.1	7.1	839	34.1	15.7	18.4	23.8	24.8	25.9	23.8	1968	357	15	67	952	96	408	952
MOC	42	0.3576	-2.207	-15.71	12.4	267	21	8.7	5.7	2264	28	12.8	15.2	23.3	18.9	23.6	17.8	101	31	0	113	72	0	68	0
MSID	10	-0.1641	-0.3981	34.23	-6.68	28	17.9	9.8	4.6	3984	28.4	7.4	21	13.7	22.7	23	12.7	565	114	0	78	287	7	9	267
MTAS	46	1.7072	-0.0123	12.88	-12.76	160	27.8	13.1	5.7	2305	39.1	16.4	22.7	26.5	27.4	31.2	25.4	1061	294	0	121	773	0	41	7
MTE	23	-1.2919	0.9527	1.13	34.7	2914	12.8	12.2	8.2	666	21	6.3	14.7	11.9	13.3	13.6	11.9	1595	231	40	44	567	159	213	565
MTFO	47	-1.5637	1.5839	-2.78	11.67	178	25.5	9.7	6.7	1364	32.3	17.9	14.4	26.1	23.3	26.8	23.3	1547	294	1	75	664	4	593	4
MTK	17	1.1407	1.6226	-0.12	37.32	4131	4.4	10.4	7.5	810	12.1	-1.6	13.7	5.2	3.4	5.4	3.2	1823	287	70	51	689	274	568	282
MUD	54	1.3703	-1.3243	-18.09	23.53	956	21.9	16.1	5.5	3681	34.6	5.6	29	24.7	16.4	25.4	16.4	566	135	0	108	383	1	193	1
MUPA	56	1.8248	0.117	-15.91	15.59	1188	22.7	16.6	6.1	2767	34.5	7.4	27.1	24.1	18.5	25.4	18.5	686	154	0	104	439	0	188	0
MUSH	49	0.3728	0.6086	-8.68	29.44	1134	23	11.7	6.5	1290	31.1	13.2	17.9	23.3	21.1	24.3	21.1	1128	210	0	88	566	0	203	20
MWA	59	0.4459	-0.3867	-8.41	29.26	1398	21.7	11.4	6.5	1198	29.6	12.2	17.4	22	20	23	19.9	1149	216	0	88	573	0	211	21
MWAB	55	0.7273	-1.0895	-16.72	35.01	169	25.4	12.7	5.8	2793	35.8	14	21.8	27.6	23	28.3	21.3	979	199	9	91	587	41	311	55
MZER	13	-0.2195	-1.3808	34.85	-6.29	1	18.3	11.4	4.6	4436	31.2	6.6	24.6	13.6	23.7	24.1	12.5	608	126	0	79	310	9	12	304
NAI	56	0.77	-1.4667	-1.37	36.85	1639	19	12.4	7.3	1213	27.8	11	16.8	20	17.4	20.4	17.2	764	165	11	74	368	42	290	54
NAM	18	0.629	-0.6374	-21.5	14.4	444	19.9	13.7	7	1980	28.8	9.5	19.3	22.3	18	22.3	17.3	40	14	0	118	33	0	33	0
NAT	40	-0.2377	1.7589	-27.4	32.15	74	22.4	12.4	5.5	3176	32	9.8	22.2	26.1	17.9	26.1	17.9	573	87	11	59	242	39	242	39
NAUK	35	-0.3649	-1.8935	-24.58	15.43	808	16.9	13	6.7	2399	26	6.7	19.3	19.9	14	19.9	13.7	61	19	1	93	42	3	42	4
NGCR	43	0.6317	-0.2477	-3.2	35.46	2145	15.4	9.3	6.6	1318	22.4	8.4	14	16.6	13.8	16.6	13.4	957	198	8	76	444	26	444	35
NGO	63	-1.8261	1.618	3.96	17.01	559	24	11.3	7.4	583	31.6	16.5	15.1	23.8	23.8	24.8	23.4	1564	227	22	55	653	94	264	134
NIA	58	0.7957	-0.3797	-12.24	36.98	529	25	10.2	6	1935	33.1	16.3	16.8	26	22.2	27.1	22.2	1243	284	2	110	822	6	286	6
NKK	60	1.1053	-1.0053	-12.88	34.02	867	21.6	10.2	5.8	2158	29.3	11.8	17.5	22.8	19.4	23.8	18.3	1151	261	1	111	748	4	280	9
NOU	51	-1.7586	1.5399	2.52	16.6	478	24.3	10.6	7.9	530	31.2	17.9	13.3	23.9	24.2	25	23.7	1682	219	38	40	615	159	348	543
NYG	47	-1.5022	1.0982	-2.81	12	228	25.1	9.5	6.6	1376	31.8	17.6	14.2	25.8	22.9	26.4	22.9	1531	294	1	75	657	4	590	4
NYK	33	-0.0908	0.9281	-10.8	33	820	23.2	11.2	5.4	2350	33.1	12.4	20.7	24.2	21.4	26.1	20	870	210	1	113	593	3	287	4
NYU	69	-2.3379	0.6203	-2.56	29.21	2009	16.8	10.1	8.2	320	23.3	11	12.3	16.8	16.7	17.3	16.5	1567	226	14	50	580	86	280	204
ODZ	55	-1.1129	2.2171	0.89	14.88	506	24	10.5	8.3	680	30.7	18.1	12.6	23.9	23.1	24.8	23.1	1659	258	37	44	637	190	514	190
OKA	54	1.551	-1.8098	-19	23	963	22.2	15.8	5.5	3798	34.6	6.3	28.3	25.2	16.6	25.8	16.6	473	110	0	104	309	1	161	1
OLI	63	1.9541	-1.149	-24	31.4	323	22.5	13.6	5.5	3493	33	8.7	24.3	26.5	17.5	26.5	17.5	508	92	5	78	269	19	269	19
OMBR	11	-0.0991	-0.49	30.75	29.15	73	19.1	10.6	4.3	4803	30.7	6.3	24.4	14.4	24.7	24.8	12.8	98	27	0	109	70	0	0	64
OMO	48	2.7212	0.8846	6.03	35.76	663	25.5	12.7	7.9	788	34.3	18.3	16	25	26.1	26.7	24.7	936	131	19	45	330	83	125	317
OROA	29	-0.243	-0.1601	15.77	19	344	29.3	15.2	5.7	3487	41.6	15.1	26.5	30.8	25.6	33.1	24	77	39	0	163	69	0	8	0
PAMA	44	1.0443	-0.7614	11.4	0.82	187	28.5	13.3	6.5	1824	39.1	18.8	20.3	26.5	27.9	31.2	26.5	866	226	0	108	578	2	124	578
QLNR	15	0.8742	0.8839	29.56	30.61	49	20.7	15	4.7	5949	35.9	4.6	31.3	14.4	26.5	27.8	12.5	14	4	0	70	9	0	0	9
RMOH	6	-0.0631	1.021	27.88	34.34	20	23.3	10.6	4.3	5028	34.8	10.2	24.6	17.3	25.6	29.4	16.4	4	1	0	47	2	0	0	2
RPON	45	-0.8841	1.0746	10.12	-14.17	2	30.3	11.1	5.5	1898	40.7	20.8	19.9	28.6	30.6	33.2	28.6	3363	1060	0	128	2516	3	110	2516
RUA	53	0.2064	-1.4296	-7.5	35	911	22.9	11.7	6.8	1448	31.1	14	17.1	23.9	20.7	24.4	20.7	580	134	0	109	383	0	170	0
RUK	52	1.5255	-1.3143	-7	31.2	936	26.1	11.9	7	1216	33.9	16.9	17	26.7	24.2	27.3	24.2	950	202	0	95	511	0	342	0
RUS	55	-1.0581	0.238	-3.24	29.25	785	25.1	10.7	7.7	417	32.2	18.4	13.8	25	24.8	25.7	24.7	924	143	4	61	389	28	117	97
RUV	62	-0.3589	1.5561	-3.13	30.38	1566	18.9	11.8	7.7	496	26.8	11.6	15.2	18.5	18.9	19.7	18.5	1112	195	2	67	469	22	134	469
RWEN	51	-1.018	-0.87	0.13	30	1675	19.3	11.5	8.7	375	26.2	13.1	13.1	19	19.4	19.7	18.8	1280	157	51	35	442	215	341	388
SAH	30	0.0562	-0.1256	13.3	13.2	295	27.1	15.1	5.6	3413	39.2	12.4	26.8	28.1	24.1	31	22	293	134	0	163	257	0	30	0
SAHB	30	-0.2056	0.397	14.54	-0.64	346	28.7	14.6	5.7	3053	40.3	14.8	25.5	28.8	24.9	32.6	24.4	392	140	0	138	309	0	68	0
SALO	51	-0.9044	0.014	-2.36	20.97	445	24.4	9.9	8.8	402	30.1	18.9	11.2	24.2	23.9	24.9	23.9	1969	242	67	33	674	252	531	252
SAM	17	1.2965	-0.3916	0.57	37.57	877	23.8	16.7	8.7	680	33.7	14.7	19	23.5	23.2	24.6	23	482	126	4	95	223	15	179	16
SBS	64	1.0877	-1.8416	-2	34	1314	22	10.6	7.9	534	28.5	15.2	13.3	22.3	21.2	22.4	21.2	976	162	11	56	394	65	247	65
SELO	79	0.8599	0.6686	-8.86	37.41	383	24.4	7.9	5.8	1609	30.5	17.1	13.4	25.3	22.4	26.1	22	1260	260	5	92	697	21	441	22
SHIM	12	-0.2256	1.3887	-4.21	39.41	306	24.1	8.5	6.5	1458	30.9	17.9	13	23.8	25.8	25.8	22.1	1092	214	22	57	468	117	117	214
SIM	23	0.4464	1.5231	13.11	38.04	2172	18.1	15.1	7.3	1346	28.8	8.3	20.5	17.5	17.6	20	16.9	903	284	2	126	661	9	113	632
SING	39	1.6871	0.2844	11.64	0.98	218	28.3	13.4	6.3	1930	39.1	18.1	21	26.5	27.3	31.3	26.5	841	225	0	110	570	1	115	570
SINM	40	0.0587	-0.2913	10.42	18.2	378	28.3	14.5	6.1	2125	39.7	16.1	23.6	26.6	26.5	31.5	26.4	874	241	0	115	607	1	94	3
SKE	25	1.4216	0.5553	-19.17	12.84	433	18	6.8	5.5	1854	23.5	11.2	12.3	20.2	15.4	20.2	15.4	52	20	0	120	41	0	41	0
SOK	18	-0.51	0.0533	-3.33	39.86	120	25.2	8.2	6.7	1219	31.7	19.6	12.1	25.2	26.5	26.7	23.6	947	192	16	58	421	88	194	191
SP	19	0.8438	0.4698	-2.19	34.5	1301	22	11.3	7.9	675	29	14.7	14.3	22.5	20.9	22.5	20.9	882	149	13	53	363	77	298	77
SSG	41	0.284	-1.4303	-26.35	25.4	1364	17.7	16	5.3	4783	30.5	0.7	29.8	22.2	11	22.8	11	519	101	2	75	255	12	255	12
SUD	51	0.3746	-1.3003	10	7.5	590	25.3	12.3	6.2	1539	35.1	15.5	19.6	23.8	24.6	27.6	23.8	1330	297	0	98	810	5	229	810
SWA	59	0.5337	-1.7114	-26	20	965	19.7	18.8	5.3	5872	35.2	-0.1	35.3	25.9	13.9	26.6	11.7	211	50	1	98	135	3	103	4
TAI	44	-0.5683	0.8457	5.35	-7.1	181	25.6	8.2	7.5	858	31.6	20.8	10.8	25.8	26.2	26.6	24.3	1795	282	39	47	664	175	375	431
TALA	14	-0.5503	-0.4802	35.18	-5.21	1419	12	12.3	4	5819	29.3	-1	30.3	5.5	19.7	19.8	4.9	1093	183	3	73	532	24	33	485
TAM	45	1.4377	0.4599	12.62	2.31	259	28.6	13.8	5.7	2556	40.1	16.3	23.8	27.3	25.7	32.1	25.7	647	194	0	127	478	0	51	0
TAR	47	2.1155	-0.7262	-4	36	1219	20.7	11.5	7	1555	28.7	12.4	16.3	22	18.8	22	18.3	781	191	1	90	410	6	298	8
TAS	17	0.9696	2.2831	24.64	9.7	1667	19.8	13.6	4.1	6936	35	2	33	15.9	27.8	27.8	10.1	40	7	1	37	15	6	6	10
TON	36	-1.8973	-0.5572	-5.46	31.8	1131	23.4	12.5	6.9	1142	31.9	13.9	18	23.3	22	25	22	1019	200	0	91	508	1	147	32
TSA	64	1.4192	-2.5597	-2.52	38.5	510	25	11.7	7.3	1402	33.3	17.3	16	25.5	22.9	26.6	22.9	756	176	8	92	359	30	273	30
TSO	46	-1.314	1.6277	-3.62	12.46	94	25.8	8.5	6.3	1479	32.2	18.8	13.4	26.5	23.5	27.3	23.5	1221	247	0	79	553	3	491	3
VOL	84	-1.8304	0.3168	-1.45	29.42	2694	13.1	10	9.1	215	18.7	7.8	10.9	13.1	13	13.2	12.8	1781	237	37	40	628	177	532	454
VWA	59	0.6852	-0.0758	-11	33.45	1115	21.4	11.7	5.4	2519	31.2	9.7	21.5	22.5	18	24.4	17.8	770	196	1	115	540	4	249	10
WAS	15	2.616	0.7322	27.13	31.37	95	22.5	15.3	4.8	5943	37.2	5.8	31.4	15.8	29.3	29.3	14.1	5	1	0	49	3	0	0	3
WAZ	43	0.8373	0.1963	11.29	14.69	306	28	14.5	6	2307	40.3	16.2	24.1	26.6	27.3	31.4	25.7	671	217	0	131	513	0	51	0
WBKF	45	1.0062	-0.0328	11.91	2.2	273	28.1	13.5	6	2238	39.1	16.8	22.3	26.6	26.2	31.5	25.9	808	227	0	115	559	1	97	2
WLU	44	1.7311	-0.6368	-12.48	24.45	1177	20.8	15.4	6	2222	32	6.6	25.4	22	17.4	22.7	17.4	1235	248	0	97	687	2	261	7
WNI	31	-2.2614	0.1437	6.5	6	148	25.9	9.1	7.4	1109	32.7	20.5	12.2	24.4	26.4	27.3	24.4	1831	320	11	67	784	61	298	784
WNIG	47	0.9353	-0.1039	12.52	2.66	179	29.1	13.5	5.7	2522	40.5	17.1	23.4	27.8	26.3	32.6	26.3	636	196	0	123	464	0	51	0
WPP	40	0.546	-1.4206	-20.44	17.25	1701	18.7	16.5	6.2	3434	30.2	3.6	26.6	21.3	13.7	22.2	13.7	440	103	0	106	295	0	193	0
WRAY	15	0.8271	0.9206	29.2	30.28	12	20.8	15.6	4.8	5977	36.1	4.1	32	14.3	24.1	27.8	12.5	8	2	0	85	5	0	0	5
YAN-RAS	34	2.7558	1.5964	11	40.5	584	26.2	13.8	6.2	2271	37.9	15.7	22.2	27.7	24.4	29	23.2	431	121	6	92	243	24	128	45
ZAK	42	-0.1532	-1.9197	10.85	19.7	422	27.8	15.4	6.3	2075	39.6	15.4	24.2	26.2	26.3	31	26	851	256	0	119	598	0	90	2
ZEM	65	-0.0723	1.3924	6.59	25.25	690	24.8	13.5	7.1	903	34.2	15.4	18.8	24.1	24.4	26.1	24	1449	247	4	76	699	23	309	46
ZIN	56	0.4646	-0.3933	-21.59	33.54	143	23.6	13.2	5.9	2986	32.5	10.4	22.1	26.5	20.6	26.5	19.2	658	142	3	95	410	21	347	26

## Sheet: Carnivore NTI NRI
plot	ntaxa	NRI	NTI	LAT	LONG	alt	bio_1	bio_2	bio_3	bio_4	bio_5	bio_6	bio_7	bio_8	bio_9	bio_10	bio_11	bio_12	bio_13	bio_14	bio_15	bio_16	bio_17	bio_18	bio_19
ABER	14	-0.6987	0.2434	-0.24	36.5	2368	14.1	14.5	8.1	658	23.4	5.5	17.9	14.4	14.1	14.9	13.2	922	125	31	38	304	116	218	266
ABI-SHA	18	-0.3963	0.2235	7.3	38.3	1878	18.6	14.4	7.5	768	27.6	8.4	19.2	17.9	18	19.6	17.9	976	145	14	55	394	65	197	108
ABTL	14	0.9166	-0.6655	12.1	18.88	724	27.4	14.7	6.1	2427	39.4	15.4	24	25.5	25.3	30.9	25.2	682	227	0	130	516	0	51	1
ADX	10	0.3661	1.2481	19.31	9.37	654	26.2	15.6	4.9	5568	40.4	8.9	31.5	31.9	20	32.1	18.2	27	11	0	116	23	0	13	0
AIHS	16	-0.7424	0.0358	-27.91	17.15	826	17.1	13.4	5.7	3633	28.4	4.9	23.5	20	14.8	21.4	12.2	84	15	3	40	35	12	21	19
AKA	27	-1.4022	-1.1154	-1.65	30.69	1341	20.9	11.7	8.7	276	27.7	14.3	13.4	20.9	20.8	21.2	20.6	967	169	6	56	382	48	191	314
AMB	18	0.327	0.2425	-2.38	37.14	1196	21.4	12.1	7.2	1363	30.3	13.6	16.7	22.2	19.6	22.8	19.3	604	124	2	79	263	10	262	15
ANG	21	2.1304	-0.8469	-15.5	15.3	1197	22.3	15.9	6	2811	33.7	7.4	26.3	23.9	18.2	25	18	709	159	0	101	442	0	209	0
ANME	15	-1.2647	0.559	15.55	1.7	331	29.2	14.5	5.7	3146	40.7	15.3	25.4	30.2	26	32.8	24.5	231	98	0	154	200	0	27	0
APFR	21	0.3727	0.629	11.39	1.16	201	28.4	13.3	6.4	1833	39.1	18.6	20.5	26.5	27.7	31.1	26.5	872	227	0	110	585	1	123	585
ARAW	7	-0.5437	0.8733	-1.43	40.15	90	27.3	10.9	7.1	1304	35	19.8	15.2	27.6	25.5	28.8	25.5	477	90	13	55	181	67	76	67
ARU	11	-0.355	-0.1804	-3.25	36.83	2231	14.6	10.2	6.6	1428	22.6	7.3	15.3	15.3	12.7	16.1	12.5	1358	334	14	82	701	48	375	61
ATFR	21	0.368	0.6218	11.56	1.44	186	28.5	13.5	6.3	1960	39.3	18.2	21.1	26.7	27.4	31.5	26.7	860	226	0	111	580	1	118	580
ATNR	15	-0.2951	1.5831	18.83	9.47	990	24.4	15.7	5	5425	38.6	7.4	31.2	29.9	18.4	30.2	16.6	41	17	0	132	34	0	19	0
AWA	23	0.1446	0.4301	9.2	40.2	823	26.1	15.4	6.6	2098	37.1	13.8	23.3	27.1	24	28.5	23.1	542	128	6	71	261	38	158	39
BAD	22	1.1102	0.3583	12.34	-13.17	74	27.6	13.4	5.7	2213	39	15.7	23.3	26.6	27	30.8	25.1	1386	378	0	116	974	0	63	20
BAIE	6	-1.2793	-1.3253	28.01	-12.27	5	19.9	8	5.4	2161	26.9	12.3	14.6	18	21.1	22.5	16.9	55	14	0	92	34	0	3	29
BALE	16	-0.0619	0.7652	6.4	39.4	1950	18.3	15	7.7	716	27.7	8.4	19.3	18.2	17.7	19.2	17.3	1098	169	19	56	407	80	404	93
BAN	24	-0.8105	-2.7561	-11.53	30.72	1213	20.6	12.1	5.7	2220	30.9	9.7	21.2	21.7	17.3	23	17.3	1238	292	0	114	835	0	423	0
BANC	6	-0.9712	0.1039	20.23	-16.11	29	24.2	12.1	5.9	2758	34.1	13.8	20.3	27.6	23.1	27.6	20.5	33	10	0	110	23	0	23	5
BASA	22	0.4411	0.6741	10.59	19.42	438	27.7	15.1	6.3	2057	39.4	15.6	23.8	26	26.3	30.9	26	871	250	0	116	605	1	93	2
BAZ	17	0.2546	0.5688	-21.75	35.43	8	23.7	9.4	5.4	2585	31.2	13.8	17.4	26.7	20.6	26.7	20.1	864	166	16	78	481	60	481	73
BBN	15	-1.1035	-1.0448	2.51	14.72	615	23.4	11.2	8.4	565	30.4	17.1	13.3	23.3	23.3	24.2	22.7	1621	241	43	45	614	172	504	438
BELZ	6	-0.3009	1.2616	35.59	6.04	1520	11.1	12.6	3.8	6994	30.6	-2.4	33	3.9	20.5	20.5	2.7	485	57	11	34	157	58	58	147
BEN	23	-0.0564	1.1081	8.36	13.82	398	26.1	12.9	6.1	1747	36.3	15.4	20.9	25	24.8	28.8	24.6	1288	274	0	97	779	0	226	3
BF	17	0.6483	-0.5385	-3.94	29.6	1992	16.3	10.8	7.2	671	23.3	8.5	14.8	16.6	15.3	16.9	15.3	1459	225	4	65	605	31	349	115
BHINE	26	0.1862	0.688	-22.9	32.86	102	24.6	13.9	6.1	3037	34.2	11.7	22.5	27.7	21.6	27.7	20.2	477	102	2	95	296	11	296	15
BIK	27	0.5352	0.1917	-15.28	14.76	1254	21.1	15	6	2761	32	7.2	24.8	22.8	17	23.7	17	778	187	0	100	468	0	243	0
BIN	22	0.0922	0.8823	9.63	14.41	257	28.2	12.7	6	2159	39.3	18.4	20.9	26.1	27	31.5	26.1	827	219	0	112	562	0	109	562
BON	21	0.3547	0.8631	10.86	-3.11	270	27.8	12.5	6.5	1652	37.5	18.4	19.1	26	27.3	30.2	26	980	259	1	104	629	5	156	629
BOUH	8	-0.7025	0.6351	34.47	9.61	302	18.1	12.5	3.9	6520	35.3	4	31.3	9.8	26.3	26.4	9.8	186	22	2	44	65	13	26	65
BUF	22	0.2036	-0.1088	-12.78	13.81	882	22.1	10.1	6.6	1553	28.5	13.4	15.1	23.4	19.6	23.4	19.6	985	276	0	99	542	1	542	1
CHAM	10	-1.1114	0.5691	35.18	8.71	922	15.7	13	3.8	7151	35.4	1.3	34.1	13.9	25.1	25.1	6.8	351	40	10	27	111	51	51	92
CHO	21	-0.4702	0.7407	-18	24.5	931	22.1	16.2	5.5	3532	35.2	5.9	29.3	24.5	16.9	25.6	16.9	588	145	0	110	405	1	209	1
CLB	16	-0.5171	0.0091	14.41	-3.4	504	26.3	13.9	5.5	2946	38.3	13.1	25.2	26.2	22.2	30.2	22.2	518	170	0	130	403	0	89	0
CMA	15	-1.037	-0.9248	2.46	10.3	671	22.3	8.1	7.8	725	27.6	17.3	10.3	21.9	22.8	23	21.2	2252	392	55	57	945	236	544	519
COM	19	1.1827	-0.6848	9.06	3.42	398	26.1	12.1	6.6	1459	35.7	17.5	18.2	24.2	26.4	28.1	24.2	1157	226	5	77	557	21	146	557
CON	20	-1.3877	-2.7693	-3.9	11.45	56	25.6	7.9	5.8	1630	31.9	18.5	13.4	27.2	23.1	27.2	23.1	1382	243	0	77	612	3	612	3
CONG	17	-0.554	-0.894	2.5	22	389	25.3	10.1	8.1	574	32.1	19.7	12.4	24.7	25.4	26.1	24.5	1715	232	58	38	608	188	345	548
CROS	10	-1.0681	-2.9483	5	6	22	26.6	7.8	7.5	940	32.2	21.9	10.3	25.3	27.1	27.8	25.3	3097	490	43	62	1276	169	450	1276
DEUX	21	0.3448	0.8539	11.59	-2.97	276	27.9	13.4	6.2	2031	38.2	16.8	21.4	26.3	26.3	30.9	25.9	891	248	1	108	594	5	126	9
DIAW	16	-0.6395	1.283	16.31	-16.4	5	25.5	11.7	6.1	2242	33.8	14.9	18.9	28.1	24.1	28.4	22.7	219	84	0	153	192	0	176	4
DJU	9	-0.547	-0.1687	36.46	4.16	1429	12.1	10.4	3.4	6915	30.1	-0.3	30.4	5.3	21.3	21.7	4.1	988	141	8	56	416	52	69	382
DVGP	16	-0.2244	0.2512	-22.53	16.96	1595	19.6	16.9	6	3659	32.3	4.4	27.9	22.7	14.4	23.5	14.4	352	88	0	107	244	3	129	3
ELB	13	-0.5038	1.5949	22.9	35.75	1	26.2	11.9	5.1	4106	37.5	14.4	23.1	24.9	21	31	20.7	15	10	0	137	14	0	0	2
ENIG	6	1.6931	0.3003	5	7.5	51	26.4	8.3	7.6	858	32.3	21.4	10.9	25.2	26.9	27.5	25.2	2557	402	28	61	1114	131	392	1114
ETO	20	0.5451	0.6019	-19	15.75	1116	22.3	16.8	5.9	3667	34.5	6.4	28.1	24.9	17	26	17	382	99	0	112	264	1	167	1
FADA	11	-0.9695	1.2418	16.96	21.4	579	27.9	15.5	5.9	3398	40.2	14.3	25.9	30	24.2	31.4	22.7	72	42	0	169	65	0	24	0
GAD	12	-0.6916	0.9269	15.14	7.15	451	27.9	14.8	5.5	3436	40.3	13.7	26.6	28.6	25	32.2	23	285	110	0	155	245	0	38	0
GAM	20	0.123	0.5643	8	34	419	27.1	14.3	7.3	1287	38.3	18.9	19.4	25.5	27.6	29	25.5	1020	196	3	79	522	17	88	522
GAR	24	-1.067	-0.1182	4.19	29.48	803	24.3	12.2	7.7	1021	33.2	17.5	15.7	23.3	25.3	25.7	23.1	1558	232	19	57	623	76	142	621
GEM	19	0.1374	0.2296	-25.7	20.4	965	20	18.8	5.3	5833	35.4	0.2	35.2	26.2	12	26.9	12	230	48	1	89	136	4	108	4
GHO	27	0.4396	-0.1257	-21.66	31.86	402	22.9	13.7	6.2	2959	32.3	10.3	22	26	18.6	26	18.6	581	117	4	90	345	20	345	20
GILE	23	0.4664	-0.1091	-16.53	38.44	120	25.2	10.2	6	2329	33.1	16.3	16.8	27.2	24.3	27.4	21.7	1277	265	12	84	733	48	499	113
GISH	24	-1.5763	-1.5312	-1.75	29.42	2599	13.8	9.8	9	227	19.4	8.6	10.8	13.6	13.7	14	13.5	1658	236	26	43	603	139	365	466
GOLD	12	-0.5341	-0.7318	-28.3	28.4	1689	14.1	15.4	5.5	4443	26.2	-1.8	28	18.5	7.9	19.1	7.9	718	116	10	62	316	40	312	40
GOMB	25	0.1886	0.5377	-4.66	29.63	1089	22	9.7	7	568	28.7	15	13.7	22	21.5	22.8	21.5	1187	200	2	72	511	15	105	88
GOR	22	0.7245	0.126	-18.83	34.51	25	25.2	13	6.2	2664	34.7	13.9	20.8	27.7	22.4	27.7	21.2	1064	219	13	87	615	57	513	71
GUS	21	-0.1553	0.8436	7.5	7.5	345	25.4	10.2	6.7	1309	33.3	18.2	15.1	23.9	25.6	27.3	23.9	1358	280	7	76	631	30	170	631
HAD	15	0.2067	0.4782	11.6	40	1004	24.2	14.8	6.7	1781	36.1	14.2	21.9	25.1	23	26.5	21.9	638	159	15	84	336	51	187	73
HLU	22	-0.0422	0.3	-28.2	31.5	542	19.7	11.5	6.2	2401	28.1	9.6	18.5	21.9	16.7	22.5	16.4	841	123	18	55	347	64	345	65
HWA	26	0.7702	0.8081	-19.19	26.62	1027	21.2	15.7	5.5	3472	33.7	5.5	28.2	23.5	16.1	24.7	16.1	532	135	0	108	361	1	195	5
ILES	19	1.0921	-1.0343	10.95	-14.95	9	27.9	10.9	6.2	1193	36.6	19.1	17.5	26.9	27.6	29.6	26.7	2705	874	0	129	2031	0	46	5
IONA	24	0.4872	-0.1679	-16.5	12.54	467	20.4	9.1	6.1	2039	26.7	12	14.7	22.4	18.3	22.5	17.4	119	35	0	123	90	0	75	0
ITG	10	1.0123	1.9878	-8.4	29.2	1053	23.3	11.6	6.5	1268	31.3	13.6	17.7	23.7	21.5	24.6	21.5	1070	201	0	88	536	0	194	20
KAB	20	0.1265	0.779	11.5	-1.25	264	27.9	12.7	6.2	1884	38.2	17.8	20.4	26	26.9	30.8	26	872	238	1	107	575	7	128	575
KAFF	15	-0.48	1.0638	-15.5	25.4	1130	20.9	15.2	5.4	3186	33.2	5.4	27.8	23	16.1	23.9	16.1	861	211	0	114	603	0	336	0
KAK	8	0.6321	-0.7634	0.3	34.85	1568	20.1	16.6	8.7	678	29.8	10.9	18.9	20	20.6	20.9	19.2	1910	258	62	37	693	248	505	565
KALT	7	-0.1947	1.0164	-25.62	20.43	969	20.1	18.8	5.3	5808	35.4	0.4	35	26.3	12.1	26.9	12.1	233	48	1	89	136	5	108	5
KAM	27	-1.0665	-1.2311	-11.85	21.67	1092	20.7	16.4	6.7	1742	31.5	7.3	24.2	21.7	18	22.1	18	1273	228	0	88	653	2	270	2
KANG	25	-0.9917	-2.3491	-9.81	16.77	1131	20.9	14	7	763	29.8	9.9	19.9	21.1	19.8	21.4	19.8	1212	211	0	76	511	7	392	22
KAP	21	1.361	-0.8682	-24.3	31	512	21.7	13.1	5.7	3240	31.4	8.6	22.8	25.4	17.1	25.4	17.1	528	110	5	82	296	17	296	17
KAS	26	1.0604	-0.078	-12.56	33.84	1201	19.9	10.7	5.9	2126	27.7	9.7	18	21.4	17.7	22	16.6	1077	245	1	109	686	5	283	8
KBIR	23	-1.2848	-2.7772	-3.6	29.32	697	24.9	10.2	7.3	512	31.9	18	13.9	24.8	24.4	25.5	24.3	958	149	4	64	403	28	110	100
KFAL	17	-0.0481	0.1073	2.25	31.8	840	24.4	12.2	7.6	898	32.9	17	15.9	23.3	25.1	25.5	23.3	1217	153	25	43	436	106	156	436
KFNP	22	0.4375	0.6696	-14.4	26.13	1098	20.9	14.7	5.6	2732	32.6	6.5	26.1	22.5	16.9	23.4	16.8	975	234	0	110	658	0	155	3
KHA	23	0.8684	1.4381	-18.75	20.76	1094	21.8	15.8	5.6	3641	34	5.9	28.1	24.6	16.4	25.3	16.4	526	139	0	110	345	0	156	0
KIB	27	-1.1915	-1.1636	0.53	30.38	1440	19.9	12	8.5	377	27.3	13.3	14	19.7	20.1	20.4	19.5	1356	200	49	44	534	193	338	227
KID	16	1.2502	1.7482	3.53	33.5	1106	23.4	12.5	7.6	1163	32.7	16.4	16.3	22	24.5	25.1	22	892	137	12	57	374	52	93	374
KIS	21	0.5689	-0.5462	-9.77	13.62	200	24	6.9	5.3	2162	29.9	16.9	13	26.1	20.8	26.1	20.8	803	232	0	111	503	0	503	0
KIZ	28	0.5107	-0.4054	-6.37	34.28	1311	21.6	12.2	7	1296	29.8	12.4	17.4	22.4	19.6	23	19.6	601	141	0	111	387	0	167	0
KNYS	6	1.6636	0.1355	-33.5	22.6	502	15.9	13.3	5.6	3476	27.6	4.2	23.4	16.5	11.3	20.2	11.3	421	44	26	13	120	91	110	91
KOR	16	-0.6792	-0.6797	5.1	8.51	74	26.2	8.4	7.9	712	32.2	21.6	10.6	25.3	26.3	27.2	25.3	2746	418	30	60	1174	127	416	1174
KOU	21	0.364	0.6527	11.55	1.95	213	28.3	13.4	6.2	2062	39.2	17.6	21.6	26.6	27	31.5	26.5	880	238	0	112	598	1	117	2
LACA	7	0.1461	1.4911	33.33	-5.17	1886	10.4	14.5	4	6524	30.6	-5	35.6	6.7	19.2	19.3	2.5	811	115	10	53	302	51	55	289
LACF	15	0.1379	1.491	12.79	17.44	289	29.4	15.9	5.7	3020	42.4	14.6	27.8	28.7	27.5	33.5	25.6	417	163	0	148	347	0	59	0
LACO	8	-0.9273	-0.2253	36.84	8.39	29	18.3	10.3	4.1	5216	32.3	7.5	24.8	13.4	24.8	25.4	12	727	136	2	67	345	21	46	331
LACT	6	-0.8712	0.8149	36.86	8.5	19	18.4	10.3	4.1	5220	32.4	7.5	24.9	13.5	24.8	25.4	12.1	724	134	2	67	343	21	46	330
LCHIL	27	1.1824	-0.0437	-15.16	35.41	951	21.2	10.3	5.7	2221	29.7	11.9	17.8	22.7	19.1	23.6	17.9	1212	270	6	103	775	20	378	21
LEF	22	-0.2733	-1.6798	-2.96	15.42	628	23.6	9.9	7.5	782	29.8	16.6	13.2	24.5	22.4	24.5	22.4	1828	246	10	56	674	66	674	66
LEN	26	0.9894	-0.2331	-16.16	34.45	282	25.3	11.9	5.6	2756	35.5	14.4	21.1	27.4	22.9	28.3	21.3	798	182	4	100	511	20	255	30
LIN	11	-0.3256	0.0004	-18.11	23.24	964	22	15.9	5.5	3621	34.5	5.9	28.6	24.7	16.6	25.4	16.6	559	132	0	109	376	1	191	1
LIW	10	-0.2509	0.6297	-14.5	35.2	499	24.2	10.9	5.6	2432	33.4	14.2	19.2	25.7	20.6	26.9	20.6	846	214	2	114	588	8	239	8
LMAG	12	1.2047	-0.8325	-1.86	36.26	616	25.1	13.5	7.7	1189	34.1	16.7	17.4	25.8	23.2	26.3	23.2	475	111	4	78	240	15	233	15
LMNY	16	-0.7418	0.7501	-3.5	35.83	957	22.2	11.6	7.1	1507	30.3	14	16.3	23.6	20.4	23.6	19.9	624	146	1	87	317	6	317	8
LNAK	17	-0.0692	0.7054	-1	36.5	1706	18.4	13.7	7.6	1243	27.9	10.1	17.8	19.1	16.7	19.7	16.5	824	183	20	72	424	71	180	86
LNHG	12	-0.9285	0.4224	-0.88	36.3	1976	16.7	14.4	7.9	1140	26.5	8.3	18.2	17.5	15.2	18	15	686	149	23	61	323	82	256	92
LOP	14	-1.3729	-0.8536	-0.16	11.85	239	25.9	9.6	7.5	929	32.2	19.5	12.7	26.1	24.4	26.7	24.4	1558	280	2	69	693	28	535	28
LTCR	14	-1.3239	-0.8436	1.1	17.26	334	25.1	10.1	8.5	546	31.5	19.7	11.8	24.7	25.3	25.8	24.4	1731	196	68	31	583	250	431	454
LUA	26	-0.4529	-1.3292	-11.11	17.62	1174	20.9	13.8	6.3	1192	30.5	8.9	21.6	21.2	19.2	21.9	19.1	1301	224	0	80	610	4	360	18
MAD	21	0.3855	0.6457	11.37	1.27	170	28.6	13.3	6.4	1840	39.3	18.7	20.6	26.7	27.9	31.3	26.7	876	227	0	109	587	1	123	587
MAGO	19	0.144	0.6616	5.4	36.1	416	27.6	12	7.7	844	36.1	20.7	15.4	28.1	28.3	28.9	26.8	575	94	15	47	235	67	100	135
MAH	20	-1.7623	-0.4863	-18.22	21.66	1034	21.8	15.6	5.6	3460	33.9	6.2	27.7	24.4	16.6	25	16.6	562	140	0	109	367	0	170	0
MAJ	26	0.9954	-0.1973	-15.56	34.35	772	22.9	11.1	5.6	2321	32.7	13.2	19.5	24.4	20.9	25.5	19.5	1063	226	7	98	663	31	329	41
MAK	7	2.8849	2.0809	-0.66	12.72	349	24.9	8.7	7.5	958	30.7	19.1	11.6	25.1	23.3	25.8	23.3	1658	265	5	60	679	49	564	49
MAM	25	0.6498	0.3813	-18.41	23.68	945	22	16	5.5	3692	34.8	5.8	29	24.7	16.5	25.6	16.5	535	130	0	110	363	0	182	0
MAN	25	0.7355	-0.1489	-15.98	29.44	463	24.1	13.5	5.3	3177	35.7	10.5	25.2	25.9	19.6	27.6	19.5	699	186	0	123	524	0	247	0
MAND	23	0.1207	0.8992	9.32	19.97	392	27.3	14.3	6.3	1717	38.8	16.4	22.4	25.6	26.9	29.9	25.6	1030	246	0	103	658	1	142	658
MAP	24	-0.0004	-0.1661	-26.39	32.81	5	22.6	10.4	5.8	2479	30.7	13	17.7	25.5	19.8	25.5	19.2	786	127	24	50	332	94	332	95
MARE	21	0.3847	0.837	11.59	-4.15	294	27.6	13.9	6.1	2044	38	15.4	22.6	26.4	25.5	30.6	25.5	921	248	0	109	610	3	127	7
MARO	21	0.5364	0.3946	-18.77	35.95	3	25.2	10	6.1	2262	32.5	16.2	16.3	27.4	24.3	27.6	21.9	1095	236	16	78	587	60	570	109
MARS	24	0.5679	1.003	2.32	37.98	1420	19.6	15.2	8.2	924	29.2	10.7	18.5	20.5	18.4	20.8	18.4	851	235	8	93	405	39	337	41
MASF	19	2.1937	0.5614	8.3	-9.36	900	22.2	14.8	6.9	750	32.7	11.4	21.3	21.6	21.7	23.1	21.5	2465	428	21	64	1177	128	372	210
MASM	25	0.0333	0.066	-1.3	35.1	1579	19.6	14.2	8.5	735	28.1	11.5	16.6	20.1	18.6	20.4	18.5	1081	172	32	42	411	140	305	149
MAT	25	0.6958	-0.1507	-16.95	28.61	986	22.2	13	5.4	2653	33.8	9.9	23.9	23.2	18.5	25.3	18.5	762	196	0	116	546	2	98	7
MATO	24	-0.0988	0.1296	-20.55	28.54	1295	18.4	14.5	5.6	3441	29.5	3.8	25.7	21.2	13.3	21.6	13.3	578	131	1	99	364	5	230	10
MAV	24	1.0306	-0.0511	-15.5	20.93	1146	20.7	16.5	6	2908	32.6	5.1	27.5	22.7	16.3	23.3	16.3	833	194	0	110	553	0	273	0
MED	18	-0.9127	-1.3399	5.86	12.77	763	23.9	10.6	7.4	911	31.9	17.7	14.2	23.1	24.5	25.1	22.7	1582	282	3	74	762	24	207	713
MER	22	0.3808	0.42	0.08	38.33	471	25	15.2	8.2	1010	34.4	15.9	18.5	25.4	23.6	26.2	23.6	458	150	0	124	256	0	168	0
MGSF	24	0.4454	0.8381	8.89	21.43	474	26.7	14.5	6.3	1674	38.4	15.5	22.9	25.2	26.4	29.1	25.2	1090	238	0	97	660	2	172	660
MHA	12	-1.4089	-1.3712	-6.12	29.5	760	23.9	9.8	6.4	1043	30.6	15.5	15.1	24.2	22.3	24.9	22.3	1031	188	1	79	458	9	221	9
MIKU	13	-0.088	1.3442	-7.2	37.13	495	24.5	9.5	6.3	1705	31.4	16.5	14.9	25.6	22	26.3	22	973	197	5	80	506	27	333	27
MNDL	25	-0.2271	1.3652	11.56	15.22	305	28.2	14.9	5.8	2515	40.7	15.3	25.4	27	27.1	31.7	25.3	579	185	0	129	450	0	40	0
MNIM	20	2.452	0.5842	7.4	-8.23	371	24.9	13.1	7.1	839	34.1	15.7	18.4	23.8	24.8	25.9	23.8	1968	357	15	67	952	96	408	952
MOC	21	0.494	0.5518	-15.71	12.4	267	21	8.7	5.7	2264	28	12.8	15.2	23.3	18.9	23.6	17.8	101	31	0	113	72	0	68	0
MSID	6	-0.3112	1.3742	34.23	-6.68	28	17.9	9.8	4.6	3984	28.4	7.4	21	13.7	22.7	23	12.7	565	114	0	78	287	7	9	267
MTAS	21	1.5993	-0.7563	12.88	-12.76	160	27.8	13.1	5.7	2305	39.1	16.4	22.7	26.5	27.4	31.2	25.4	1061	294	0	121	773	0	41	7
MTE	7	2.0609	1.0675	1.13	34.7	2914	12.8	12.2	8.2	666	21	6.3	14.7	11.9	13.3	13.6	11.9	1595	231	40	44	567	159	213	565
MTFO	17	-1.9701	-2.2428	-2.78	11.67	178	25.5	9.7	6.7	1364	32.3	17.9	14.4	26.1	23.3	26.8	23.3	1547	294	1	75	664	4	593	4
MTK	12	-0.1685	0.5227	-0.12	37.32	4131	4.4	10.4	7.5	810	12.1	-1.6	13.7	5.2	3.4	5.4	3.2	1823	287	70	51	689	274	568	282
MUD	24	0.4004	1.0338	-18.09	23.53	956	21.9	16.1	5.5	3681	34.6	5.6	29	24.7	16.4	25.4	16.4	566	135	0	108	383	1	193	1
MUPA	26	0.3745	0.3168	-15.91	15.59	1188	22.7	16.6	6.1	2767	34.5	7.4	27.1	24.1	18.5	25.4	18.5	686	154	0	104	439	0	188	0
MUSH	22	0.1786	0.3677	-8.68	29.44	1134	23	11.7	6.5	1290	31.1	13.2	17.9	23.3	21.1	24.3	21.1	1128	210	0	88	566	0	203	20
MWA	26	-0.3294	-2.7916	-8.41	29.26	1398	21.7	11.4	6.5	1198	29.6	12.2	17.4	22	20	23	19.9	1149	216	0	88	573	0	211	21
MWAB	24	0.6019	0.1964	-16.72	35.01	169	25.4	12.7	5.8	2793	35.8	14	21.8	27.6	23	28.3	21.3	979	199	9	91	587	41	311	55
MZER	8	-0.9372	-0.2356	34.85	-6.29	1	18.3	11.4	4.6	4436	31.2	6.6	24.6	13.6	23.7	24.1	12.5	608	126	0	79	310	9	12	304
NAI	23	0.0737	-0.256	-1.37	36.85	1639	19	12.4	7.3	1213	27.8	11	16.8	20	17.4	20.4	17.2	764	165	11	74	368	42	290	54
NAM	11	-0.261	-0.5199	-21.5	14.4	444	19.9	13.7	7	1980	28.8	9.5	19.3	22.3	18	22.3	17.3	40	14	0	118	33	0	33	0
NAT	16	0.9268	-0.2645	-27.4	32.15	74	22.4	12.4	5.5	3176	32	9.8	22.2	26.1	17.9	26.1	17.9	573	87	11	59	242	39	242	39
NAUK	16	-0.3525	-0.2228	-24.58	15.43	808	16.9	13	6.7	2399	26	6.7	19.3	19.9	14	19.9	13.7	61	19	1	93	42	3	42	4
NGCR	18	0.2727	1.072	-3.2	35.46	2145	15.4	9.3	6.6	1318	22.4	8.4	14	16.6	13.8	16.6	13.4	957	198	8	76	444	26	444	35
NGO	18	-0.9646	-2.1411	3.96	17.01	559	24	11.3	7.4	583	31.6	16.5	15.1	23.8	23.8	24.8	23.4	1564	227	22	55	653	94	264	134
NIA	25	1.2311	-0.2676	-12.24	36.98	529	25	10.2	6	1935	33.1	16.3	16.8	26	22.2	27.1	22.2	1243	284	2	110	822	6	286	6
NKK	27	1.1322	-0.3472	-12.88	34.02	867	21.6	10.2	5.8	2158	29.3	11.8	17.5	22.8	19.4	23.8	18.3	1151	261	1	111	748	4	280	9
NOU	14	-1.3154	-0.8414	2.52	16.6	478	24.3	10.6	7.9	530	31.2	17.9	13.3	23.9	24.2	25	23.7	1682	219	38	40	615	159	348	543
NYG	18	-1.6247	-2.2394	-2.81	12	228	25.1	9.5	6.6	1376	31.8	17.6	14.2	25.8	22.9	26.4	22.9	1531	294	1	75	657	4	590	4
NYK	11	-0.8178	0.7725	-10.8	33	820	23.2	11.2	5.4	2350	33.1	12.4	20.7	24.2	21.4	26.1	20	870	210	1	113	593	3	287	4
NYU	23	-1.2779	-2.8196	-2.56	29.21	2009	16.8	10.1	8.2	320	23.3	11	12.3	16.8	16.7	17.3	16.5	1567	226	14	50	580	86	280	204
ODZ	16	-0.7778	-0.378	0.89	14.88	506	24	10.5	8.3	680	30.7	18.1	12.6	23.9	23.1	24.8	23.1	1659	258	37	44	637	190	514	190
OKA	23	-0.1813	0.5784	-19	23	963	22.2	15.8	5.5	3798	34.6	6.3	28.3	25.2	16.6	25.8	16.6	473	110	0	104	309	1	161	1
OLI	25	0.4034	0.4068	-24	31.4	323	22.5	13.6	5.5	3493	33	8.7	24.3	26.5	17.5	26.5	17.5	508	92	5	78	269	19	269	19
OMBR	7	-0.394	1.1228	30.75	29.15	73	19.1	10.6	4.3	4803	30.7	6.3	24.4	14.4	24.7	24.8	12.8	98	27	0	109	70	0	0	64
OMO	21	0.1787	1.0814	6.03	35.76	663	25.5	12.7	7.9	788	34.3	18.3	16	25	26.1	26.7	24.7	936	131	19	45	330	83	125	317
OROA	15	-0.3385	1.6056	15.77	19	344	29.3	15.2	5.7	3487	41.6	15.1	26.5	30.8	25.6	33.1	24	77	39	0	163	69	0	8	0
PAMA	20	0.7977	-0.5216	11.4	0.82	187	28.5	13.3	6.5	1824	39.1	18.8	20.3	26.5	27.9	31.2	26.5	866	226	0	108	578	2	124	578
QLNR	10	-0.0335	0.9311	29.56	30.61	49	20.7	15	4.7	5949	35.9	4.6	31.3	14.4	26.5	27.8	12.5	14	4	0	70	9	0	0	9
RPON	19	1.0827	-1.0447	10.12	-14.17	2	30.3	11.1	5.5	1898	40.7	20.8	19.9	28.6	30.6	33.2	28.6	3363	1060	0	128	2516	3	110	2516
RUA	20	0.8409	0.2329	-7.5	35	911	22.9	11.7	6.8	1448	31.1	14	17.1	23.9	20.7	24.4	20.7	580	134	0	109	383	0	170	0
RUK	17	1.505	-0.0779	-7	31.2	936	26.1	11.9	7	1216	33.9	16.9	17	26.7	24.2	27.3	24.2	950	202	0	95	511	0	342	0
RUS	20	0.482	-1.3815	-3.24	29.25	785	25.1	10.7	7.7	417	32.2	18.4	13.8	25	24.8	25.7	24.7	924	143	4	61	389	28	117	97
RUV	25	0.5904	0.4853	-3.13	30.38	1566	18.9	11.8	7.7	496	26.8	11.6	15.2	18.5	18.9	19.7	18.5	1112	195	2	67	469	22	134	469
RWEN	19	0.3827	-0.2546	0.13	30	1675	19.3	11.5	8.7	375	26.2	13.1	13.1	19	19.4	19.7	18.8	1280	157	51	35	442	215	341	388
SAH	16	-0.8587	1.3206	13.3	13.2	295	27.1	15.1	5.6	3413	39.2	12.4	26.8	28.1	24.1	31	22	293	134	0	163	257	0	30	0
SAHB	16	0.4133	-0.021	14.54	-0.64	346	28.7	14.6	5.7	3053	40.3	14.8	25.5	28.8	24.9	32.6	24.4	392	140	0	138	309	0	68	0
SALO	20	-1.065	-2.1015	-2.36	20.97	445	24.4	9.9	8.8	402	30.1	18.9	11.2	24.2	23.9	24.9	23.9	1969	242	67	33	674	252	531	252
SBS	24	0.2766	0.1837	-2	34	1314	22	10.6	7.9	534	28.5	15.2	13.3	22.3	21.2	22.4	21.2	976	162	11	56	394	65	247	65
SELO	31	-0.5925	-1.8066	-8.86	37.41	383	24.4	7.9	5.8	1609	30.5	17.1	13.4	25.3	22.4	26.1	22	1260	260	5	92	697	21	441	22
SIM	11	0.4912	0.2981	13.11	38.04	2172	18.1	15.1	7.3	1346	28.8	8.3	20.5	17.5	17.6	20	16.9	903	284	2	126	661	9	113	632
SING	19	0.1139	1.1234	11.64	0.98	218	28.3	13.4	6.3	1930	39.1	18.1	21	26.5	27.3	31.3	26.5	841	225	0	110	570	1	115	570
SINM	18	0.8537	1.033	10.42	18.2	378	28.3	14.5	6.1	2125	39.7	16.1	23.6	26.6	26.5	31.5	26.4	874	241	0	115	607	1	94	3
SKE	15	0.2262	-1.0335	-19.17	12.84	433	18	6.8	5.5	1854	23.5	11.2	12.3	20.2	15.4	20.2	15.4	52	20	0	120	41	0	41	0
SOK	4	0.9925	0.3477	-3.33	39.86	120	25.2	8.2	6.7	1219	31.7	19.6	12.1	25.2	26.5	26.7	23.6	947	192	16	58	421	88	194	191
SP	9	-0.2006	1.1576	-2.19	34.5	1301	22	11.3	7.9	675	29	14.7	14.3	22.5	20.9	22.5	20.9	882	149	13	53	363	77	298	77
SSG	18	0.7893	0.5862	-26.35	25.4	1364	17.7	16	5.3	4783	30.5	0.7	29.8	22.2	11	22.8	11	519	101	2	75	255	12	255	12
SUD	23	-0.4596	1.7754	10	7.5	590	25.3	12.3	6.2	1539	35.1	15.5	19.6	23.8	24.6	27.6	23.8	1330	297	0	98	810	5	229	810
SWA	24	-0.0137	0.1711	-26	20	965	19.7	18.8	5.3	5872	35.2	-0.1	35.3	25.9	13.9	26.6	11.7	211	50	1	98	135	3	103	4
TAI	13	0.6778	0.799	5.35	-7.1	181	25.6	8.2	7.5	858	31.6	20.8	10.8	25.8	26.2	26.6	24.3	1795	282	39	47	664	175	375	431
TALA	7	-0.306	0.8034	35.18	-5.21	1419	12	12.3	4	5819	29.3	-1	30.3	5.5	19.7	19.8	4.9	1093	183	3	73	532	24	33	485
TAM	23	-0.2111	0.8626	12.62	2.31	259	28.6	13.8	5.7	2556	40.1	16.3	23.8	27.3	25.7	32.1	25.7	647	194	0	127	478	0	51	0
TAR	16	-0.3635	0.3803	-4	36	1219	20.7	11.5	7	1555	28.7	12.4	16.3	22	18.8	22	18.3	781	191	1	90	410	6	298	8
TAS	10	1.0779	2.3745	24.64	9.7	1667	19.8	13.6	4.1	6936	35	2	33	15.9	27.8	27.8	10.1	40	7	1	37	15	6	6	10
TON	8	-0.8871	0.0878	-5.46	31.8	1131	23.4	12.5	6.9	1142	31.9	13.9	18	23.3	22	25	22	1019	200	0	91	508	1	147	32
TSA	26	0.6322	0.0229	-2.52	38.5	510	25	11.7	7.3	1402	33.3	17.3	16	25.5	22.9	26.6	22.9	756	176	8	92	359	30	273	30
TSO	20	-1.3615	-2.8576	-3.62	12.46	94	25.8	8.5	6.3	1479	32.2	18.8	13.4	26.5	23.5	27.3	23.5	1221	247	0	79	553	3	491	3
VOL	26	-1.4097	-1.3227	-1.45	29.42	2694	13.1	10	9.1	215	18.7	7.8	10.9	13.1	13	13.2	12.8	1781	237	37	40	628	177	532	454
VWA	26	1.0321	-0.1108	-11	33.45	1115	21.4	11.7	5.4	2519	31.2	9.7	21.5	22.5	18	24.4	17.8	770	196	1	115	540	4	249	10
WAS	12	0.358	1.0126	27.13	31.37	95	22.5	15.3	4.8	5943	37.2	5.8	31.4	15.8	29.3	29.3	14.1	5	1	0	49	3	0	0	3
WAZ	21	0.4311	1.057	11.29	14.69	306	28	14.5	6	2307	40.3	16.2	24.1	26.6	27.3	31.4	25.7	671	217	0	131	513	0	51	0
WBKF	21	0.3848	0.6316	11.91	2.2	273	28.1	13.5	6	2238	39.1	16.8	22.3	26.6	26.2	31.5	25.9	808	227	0	115	559	1	97	2
WLU	16	0.3265	-0.3024	-12.48	24.45	1177	20.8	15.4	6	2222	32	6.6	25.4	22	17.4	22.7	17.4	1235	248	0	97	687	2	261	7
WNI	4	0.9357	0.1425	6.5	6	148	25.9	9.1	7.4	1109	32.7	20.5	12.2	24.4	26.4	27.3	24.4	1831	320	11	67	784	61	298	784
WNIG	23	-0.198	0.905	12.52	2.66	179	29.1	13.5	5.7	2522	40.5	17.1	23.4	27.8	26.3	32.6	26.3	636	196	0	123	464	0	51	0
WPP	18	-0.1296	0.3992	-20.44	17.25	1701	18.7	16.5	6.2	3434	30.2	3.6	26.6	21.3	13.7	22.2	13.7	440	103	0	106	295	0	193	0
WRAY	10	-0.2092	0.9251	29.2	30.28	12	20.8	15.6	4.8	5977	36.1	4.1	32	14.3	24.1	27.8	12.5	8	2	0	85	5	0	0	5
YAN-RAS	16	1.4805	1.0886	11	40.5	584	26.2	13.8	6.2	2271	37.9	15.7	22.2	27.7	24.4	29	23.2	431	121	6	92	243	24	128	45
ZAK	17	0.0674	-1.2159	10.85	19.7	422	27.8	15.4	6.3	2075	39.6	15.4	24.2	26.2	26.3	31	26	851	256	0	119	598	0	90	2
ZEM	27	-1.1392	-0.9736	6.59	25.25	690	24.8	13.5	7.1	903	34.2	15.4	18.8	24.1	24.4	26.1	24	1449	247	4	76	699	23	309	46
ZIN	22	0.5099	0.1667	-21.59	33.54	143	23.6	13.2	5.9	2986	32.5	10.4	22.1	26.5	20.6	26.5	19.2	658	142	3	95	410	21	347	26

## Sheet: Primate NTI NRI
plot	ntaxa	NRI	NTI	LAT	LONG	alt	bio_1	bio_2	bio_3	bio_4	bio_5	bio_6	bio_7	bio_8	bio_9	bio_10	bio_11	bio_12	bio_13	bio_14	bio_15	bio_16	bio_17	bio_18	bio_19
ABER	5	0.3224	-1.106	-0.24	36.5	2368	14.1	14.5	8.1	658	23.4	5.5	17.9	14.4	14.1	14.9	13.2	922	125	31	38	304	116	218	266
ABTL	4	0.0036	-0.4997	12.1	18.88	724	27.4	14.7	6.1	2427	39.4	15.4	24	25.5	25.3	30.9	25.2	682	227	0	130	516	0	51	1
AKA	14	-1.2287	-0.1766	-1.65	30.69	1341	20.9	11.7	8.7	276	27.7	14.3	13.4	20.9	20.8	21.2	20.6	967	169	6	56	382	48	191	314
ANG	4	-0.7989	0.9595	-15.5	15.3	1197	22.3	15.9	6	2811	33.7	7.4	26.3	23.9	18.2	25	18	709	159	0	101	442	0	209	0
APFR	4	-0.0075	-0.5105	11.39	1.16	201	28.4	13.3	6.4	1833	39.1	18.6	20.5	26.5	27.7	31.1	26.5	872	227	0	110	585	1	123	585
ARU	6	-0.3985	0.4394	-3.25	36.83	2231	14.6	10.2	6.6	1428	22.6	7.3	15.3	15.3	12.7	16.1	12.5	1358	334	14	82	701	48	375	61
ATFR	4	-0.0144	-0.5191	11.56	1.44	186	28.5	13.5	6.3	1960	39.3	18.2	21.1	26.7	27.4	31.5	26.7	860	226	0	111	580	1	118	580
AWA	4	2.0215	1.4875	9.2	40.2	823	26.1	15.4	6.6	2098	37.1	13.8	23.3	27.1	24	28.5	23.1	542	128	6	71	261	38	158	39
BAD	7	0.8518	-1.8942	12.34	-13.17	74	27.6	13.4	5.7	2213	39	15.7	23.3	26.6	27	30.8	25.1	1386	378	0	116	974	0	63	20
BAN	5	-0.5769	0.926	-11.53	30.72	1213	20.6	12.1	5.7	2220	30.9	9.7	21.2	21.7	17.3	23	17.3	1238	292	0	114	835	0	423	0
BASA	5	0.3552	-1.0463	10.59	19.42	438	27.7	15.1	6.3	2057	39.4	15.6	23.8	26	26.3	30.9	26	871	250	0	116	605	1	93	2
BAZ	5	-0.5535	0.8514	-21.75	35.43	8	23.7	9.4	5.4	2585	31.2	13.8	17.4	26.7	20.6	26.7	20.1	864	166	16	78	481	60	481	73
BBN	17	-0.4273	-0.2754	2.51	14.72	615	23.4	11.2	8.4	565	30.4	17.1	13.3	23.3	23.3	24.2	22.7	1621	241	43	45	614	172	504	438
BEN	5	0.358	-1.0585	8.36	13.82	398	26.1	12.9	6.1	1747	36.3	15.4	20.9	25	24.8	28.8	24.6	1288	274	0	97	779	0	226	3
BF	11	-0.8584	-0.8917	-3.94	29.6	1992	16.3	10.8	7.2	671	23.3	8.5	14.8	16.6	15.3	16.9	15.3	1459	225	4	65	605	31	349	115
BHINE	5	-0.5538	0.8599	-22.9	32.86	102	24.6	13.9	6.1	3037	34.2	11.7	22.5	27.7	21.6	27.7	20.2	477	102	2	95	296	11	296	15
BIK	4	-0.7915	0.9623	-15.28	14.76	1254	21.1	15	6	2761	32	7.2	24.8	22.8	17	23.7	17	778	187	0	100	468	0	243	0
BIN	5	0.3288	-1.0458	9.63	14.41	257	28.2	12.7	6	2159	39.3	18.4	20.9	26.1	27	31.5	26.1	827	219	0	112	562	0	109	562
BON	4	-0.001	-0.4926	10.86	-3.11	270	27.8	12.5	6.5	1652	37.5	18.4	19.1	26	27.3	30.2	26	980	259	1	104	629	5	156	629
BUF	4	-0.7992	0.9566	-12.78	13.81	882	22.1	10.1	6.6	1553	28.5	13.4	15.1	23.4	19.6	23.4	19.6	985	276	0	99	542	1	542	1
CLB	4	0.007	-0.5066	14.41	-3.4	504	26.3	13.9	5.5	2946	38.3	13.1	25.2	26.2	22.2	30.2	22.2	518	170	0	130	403	0	89	0
CMA	17	-0.9856	-0.4777	2.46	10.3	671	22.3	8.1	7.8	725	27.6	17.3	10.3	21.9	22.8	23	21.2	2252	392	55	57	945	236	544	519
COM	14	1.077	-2.1117	9.06	3.42	398	26.1	12.1	6.6	1459	35.7	17.5	18.2	24.2	26.4	28.1	24.2	1157	226	5	77	557	21	146	557
CON	13	-1.5167	0.1629	-3.9	11.45	56	25.6	7.9	5.8	1630	31.9	18.5	13.4	27.2	23.1	27.2	23.1	1382	243	0	77	612	3	612	3
CONG	16	2.4761	-1.1182	2.5	22	389	25.3	10.1	8.1	574	32.1	19.7	12.4	24.7	25.4	26.1	24.5	1715	232	58	38	608	188	345	548
CROS	13	-1.1364	-0.3474	5	6	22	26.6	7.8	7.5	940	32.2	21.9	10.3	25.3	27.1	27.8	25.3	3097	490	43	62	1276	169	450	1276
DEUX	4	-0.0071	-0.5081	11.59	-2.97	276	27.9	13.4	6.2	2031	38.2	16.8	21.4	26.3	26.3	30.9	25.9	891	248	1	108	594	5	126	9
ENIG	7	-0.2766	-1.3264	5	7.5	51	26.4	8.3	7.6	858	32.3	21.4	10.9	25.2	26.9	27.5	25.2	2557	402	28	61	1114	131	392	1114
GAM	5	2.5714	0.8964	8	34	419	27.1	14.3	7.3	1287	38.3	18.9	19.4	25.5	27.6	29	25.5	1020	196	3	79	522	17	88	522
GAR	12	1.5739	-0.6903	4.19	29.48	803	24.3	12.2	7.7	1021	33.2	17.5	15.7	23.3	25.3	25.7	23.1	1558	232	19	57	623	76	142	621
GHO	5	-0.5673	0.9488	-21.66	31.86	402	22.9	13.7	6.2	2959	32.3	10.3	22	26	18.6	26	18.6	581	117	4	90	345	20	345	20
GILE	6	-0.6405	0.864	-16.53	38.44	120	25.2	10.2	6	2329	33.1	16.3	16.8	27.2	24.3	27.4	21.7	1277	265	12	84	733	48	499	113
GISH	18	-0.7708	0.4876	-1.75	29.42	2599	13.8	9.8	9	227	19.4	8.6	10.8	13.6	13.7	14	13.5	1658	236	26	43	603	139	365	466
GOMB	12	-0.808	0.7431	-4.66	29.63	1089	22	9.7	7	568	28.7	15	13.7	22	21.5	22.8	21.5	1187	200	2	72	511	15	105	88
GOR	6	-0.6372	0.8581	-18.83	34.51	25	25.2	13	6.2	2664	34.7	13.9	20.8	27.7	22.4	27.7	21.2	1064	219	13	87	615	57	513	71
GUS	8	1.874	-1.3436	7.5	7.5	345	25.4	10.2	6.7	1309	33.3	18.2	15.1	23.9	25.6	27.3	23.9	1358	280	7	76	631	30	170	631
HLU	4	0.0066	-0.5557	-28.2	31.5	542	19.7	11.5	6.2	2401	28.1	9.6	18.5	21.9	16.7	22.5	16.4	841	123	18	55	347	64	345	65
HWA	4	-0.7816	0.9848	-19.19	26.62	1027	21.2	15.7	5.5	3472	33.7	5.5	28.2	23.5	16.1	24.7	16.1	532	135	0	108	361	1	195	5
ILES	11	1.1703	-2.3456	10.95	-14.95	9	27.9	10.9	6.2	1193	36.6	19.1	17.5	26.9	27.6	29.6	26.7	2705	874	0	129	2031	0	46	5
ITG	4	-0.2485	-1.0737	-8.4	29.2	1053	23.3	11.6	6.5	1268	31.3	13.6	17.7	23.7	21.5	24.6	21.5	1070	201	0	88	536	0	194	20
KAB	4	-0.009	-0.4997	11.5	-1.25	264	27.9	12.7	6.2	1884	38.2	17.8	20.4	26	26.9	30.8	26	872	238	1	107	575	7	128	575
KAK	4	1.9984	1.1996	0.3	34.85	1568	20.1	16.6	8.7	678	29.8	10.9	18.9	20	20.6	20.9	19.2	1910	258	62	37	693	248	505	565
KAM	5	-0.7346	0.4458	-11.85	21.67	1092	20.7	16.4	6.7	1742	31.5	7.3	24.2	21.7	18	22.1	18	1273	228	0	88	653	2	270	2
KANG	7	-0.729	0.0345	-9.81	16.77	1131	20.9	14	7	763	29.8	9.9	19.9	21.1	19.8	21.4	19.8	1212	211	0	76	511	7	392	22
KAS	6	-0.6435	0.8518	-12.56	33.84	1201	19.9	10.7	5.9	2126	27.7	9.7	18	21.4	17.7	22	16.6	1077	245	1	109	686	5	283	8
KBIR	15	-1.0706	-0.3568	-3.6	29.32	697	24.9	10.2	7.3	512	31.9	18	13.9	24.8	24.4	25.5	24.3	958	149	4	64	403	28	110	100
KFAL	6	2.5211	0.0802	2.25	31.8	840	24.4	12.2	7.6	898	32.9	17	15.9	23.3	25.1	25.5	23.3	1217	153	25	43	436	106	156	436
KFNP	5	-0.5665	0.9479	-14.4	26.13	1098	20.9	14.7	5.6	2732	32.6	6.5	26.1	22.5	16.9	23.4	16.8	975	234	0	110	658	0	155	3
KIB	17	0.2095	1.4911	0.53	30.38	1440	19.9	12	8.5	377	27.3	13.3	14	19.7	20.1	20.4	19.5	1356	200	49	44	534	193	338	227
KID	4	0.0052	-0.4931	3.53	33.5	1106	23.4	12.5	7.6	1163	32.7	16.4	16.3	22	24.5	25.1	22	892	137	12	57	374	52	93	374
KILI	4	-0.8686	0.5989	-3	37.5	2690	12.1	10	6.7	1352	19.8	5	14.8	13	10.2	13.6	10.2	1301	253	12	81	558	41	382	41
KIS	7	-0.5582	0.3838	-9.77	13.62	200	24	6.9	5.3	2162	29.9	16.9	13	26.1	20.8	26.1	20.8	803	232	0	111	503	0	503	0
KIZ	7	0.3622	1.8298	-6.37	34.28	1311	21.6	12.2	7	1296	29.8	12.4	17.4	22.4	19.6	23	19.6	601	141	0	111	387	0	167	0
KNYS	5	-0.5674	0.9318	-33.5	22.6	502	15.9	13.3	5.6	3476	27.6	4.2	23.4	16.5	11.3	20.2	11.3	421	44	26	13	120	91	110	91
KOR	17	-0.8368	-0.8355	5.1	8.51	74	26.2	8.4	7.9	712	32.2	21.6	10.6	25.3	26.3	27.2	25.3	2746	418	30	60	1174	127	416	1174
KOU	4	0.0005	-0.5002	11.55	1.95	213	28.3	13.4	6.2	2062	39.2	17.6	21.6	26.6	27	31.5	26.5	880	238	0	112	598	1	117	2
LACF	4	0.0077	-0.5079	12.79	17.44	289	29.4	15.9	5.7	3020	42.4	14.6	27.8	28.7	27.5	33.5	25.6	417	163	0	148	347	0	59	0
LCHIL	6	-0.6403	0.8416	0.25	36.1	1008	24.1	16.3	8.7	637	33.7	15.1	18.6	24.8	24.2	24.9	23.3	731	104	30	37	255	109	195	208
LEF	10	-1.223	0.1811	-15.16	35.41	951	21.2	10.3	5.7	2221	29.7	11.9	17.8	22.7	19.1	23.6	17.9	1212	270	6	103	775	20	378	21
LEN	6	-0.6356	0.8429	-2.96	15.42	628	23.6	9.9	7.5	782	29.8	16.6	13.2	24.5	22.4	24.5	22.4	1828	246	10	56	674	66	674	66
LMNY	6	-0.1932	1.2016	-16.16	34.45	282	25.3	11.9	5.6	2756	35.5	14.4	21.1	27.4	22.9	28.3	21.3	798	182	4	100	511	20	255	30
LNAK	5	0.3317	-1.1191	-3.5	35.83	957	22.2	11.6	7.1	1507	30.3	14	16.3	23.6	20.4	23.6	19.9	624	146	1	87	317	6	317	8
LOP	17	-1.0126	-0.6948	-1	36.5	1706	18.4	13.7	7.6	1243	27.9	10.1	17.8	19.1	16.7	19.7	16.5	824	183	20	72	424	71	180	86
LTCR	17	-0.3008	-0.2015	-0.16	11.85	239	25.9	9.6	7.5	929	32.2	19.5	12.7	26.1	24.4	26.7	24.4	1558	280	2	69	693	28	535	28
LUA	7	-0.5167	0.6418	1.1	17.26	334	25.1	10.1	8.5	546	31.5	19.7	11.8	24.7	25.3	25.8	24.4	1731	196	68	31	583	250	431	454
MAD	4	-0.0185	-0.5004	-11.11	17.62	1174	20.9	13.8	6.3	1192	30.5	8.9	21.6	21.2	19.2	21.9	19.1	1301	224	0	80	610	4	360	18
MAGO	6	3.2589	0.8406	11.37	1.27	170	28.6	13.3	6.4	1840	39.3	18.7	20.6	26.7	27.9	31.3	26.7	876	227	0	109	587	1	123	587
MAH	10	-0.2647	-0.7183	5.4	36.1	416	27.6	12	7.7	844	36.1	20.7	15.4	28.1	28.3	28.9	26.8	575	94	15	47	235	67	100	135
MAJ	6	-0.64	0.8589	-15.56	34.35	772	22.9	11.1	5.6	2321	32.7	13.2	19.5	24.4	20.9	25.5	19.5	1063	226	7	98	663	31	329	41
MAK	16	-0.5377	-1.2638	-0.66	12.72	349	24.9	8.7	7.5	958	30.7	19.1	11.6	25.1	23.3	25.8	23.3	1658	265	5	60	679	49	564	49
MAN	5	-0.5683	0.9455	-15.98	29.44	463	24.1	13.5	5.3	3177	35.7	10.5	25.2	25.9	19.6	27.6	19.5	699	186	0	123	524	0	247	0
MAND	5	0.3395	-1.0524	9.32	19.97	392	27.3	14.3	6.3	1717	38.8	16.4	22.4	25.6	26.9	29.9	25.6	1030	246	0	103	658	1	142	658
MAP	4	-0.0065	-0.5719	-26.39	32.81	5	22.6	10.4	5.8	2479	30.7	13	17.7	25.5	19.8	25.5	19.2	786	127	24	50	332	94	332	95
MARE	4	-0.0152	-0.5082	11.59	-4.15	294	27.6	13.9	6.1	2044	38	15.4	22.6	26.4	25.5	30.6	25.5	921	248	0	109	610	3	127	7
MARO	6	-0.6305	0.8652	-18.77	35.95	3	25.2	10	6.1	2262	32.5	16.2	16.3	27.4	24.3	27.6	21.9	1095	236	16	78	587	60	570	109
MARS	5	2.5136	0.8807	2.32	37.98	1420	19.6	15.2	8.2	924	29.2	10.7	18.5	20.5	18.4	20.8	18.4	851	235	8	93	405	39	337	41
MASF	14	-0.1147	-1.3261	8.3	-9.36	900	22.2	14.8	6.9	750	32.7	11.4	21.3	21.6	21.7	23.1	21.5	2465	428	21	64	1177	128	372	210
MASM	8	0.5268	0.6047	-1.3	35.1	1579	19.6	14.2	8.5	735	28.1	11.5	16.6	20.1	18.6	20.4	18.5	1081	172	32	42	411	140	305	149
MATO	4	-0.8077	0.9456	-20.55	28.54	1295	18.4	14.5	5.6	3441	29.5	3.8	25.7	21.2	13.3	21.6	13.3	578	131	1	99	364	5	230	10
MAV	4	-0.7993	0.9647	-15.5	20.93	1146	20.7	16.5	6	2908	32.6	5.1	27.5	22.7	16.3	23.3	16.3	833	194	0	110	553	0	273	0
MED	11	-0.8869	0.4442	5.86	12.77	763	23.9	10.6	7.4	911	31.9	17.7	14.2	23.1	24.5	25.1	22.7	1582	282	3	74	762	24	207	713
MER	6	-0.1693	0.8644	0.08	38.33	471	25	15.2	8.2	1010	34.4	15.9	18.5	25.4	23.6	26.2	23.6	458	150	0	124	256	0	168	0
MGSF	9	2.5627	-1.499	8.89	21.43	474	26.7	14.5	6.3	1674	38.4	15.5	22.9	25.2	26.4	29.1	25.2	1090	238	0	97	660	2	172	660
MHA	14	0.7011	-1.3886	-6.12	29.5	760	23.9	9.8	6.4	1043	30.6	15.5	15.1	24.2	22.3	24.9	22.3	1031	188	1	79	458	9	221	9
MNDL	4	0.0022	-0.5033	11.56	15.22	305	28.2	14.9	5.8	2515	40.7	15.3	25.4	27	27.1	31.7	25.3	579	185	0	129	450	0	40	0
MNIM	11	-0.0144	-0.6082	7.4	-8.23	371	24.9	13.1	7.1	839	34.1	15.7	18.4	23.8	24.8	25.9	23.8	1968	357	15	67	952	96	408	952
MTAS	7	0.8757	-1.9234	12.88	-12.76	160	27.8	13.1	5.7	2305	39.1	16.4	22.7	26.5	27.4	31.2	25.4	1061	294	0	121	773	0	41	7
MTE	4	1.8991	1.0806	1.13	34.7	2914	12.8	12.2	8.2	666	21	6.3	14.7	11.9	13.3	13.6	11.9	1595	231	40	44	567	159	213	565
MTFO	11	-1.3964	0.6126	-2.78	11.67	178	25.5	9.7	6.7	1364	32.3	17.9	14.4	26.1	23.3	26.8	23.3	1547	294	1	75	664	4	593	4
MUPA	4	-0.7822	0.9797	-15.91	15.59	1188	22.7	16.6	6.1	2767	34.5	7.4	27.1	24.1	18.5	25.4	18.5	686	154	0	104	439	0	188	0
MUSH	4	-0.7965	0.95	-8.68	29.44	1134	23	11.7	6.5	1290	31.1	13.2	17.9	23.3	21.1	24.3	21.1	1128	210	0	88	566	0	203	20
MWA	7	-0.3688	-0.3717	-8.41	29.26	1398	21.7	11.4	6.5	1198	29.6	12.2	17.4	22	20	23	19.9	1149	216	0	88	573	0	211	21
MWAB	6	-0.6331	0.8569	-16.72	35.01	169	25.4	12.7	5.8	2793	35.8	14	21.8	27.6	23	28.3	21.3	979	199	9	91	587	41	311	55
NAI	5	-0.6976	0.7421	-1.37	36.85	1639	19	12.4	7.3	1213	27.8	11	16.8	20	17.4	20.4	17.2	764	165	11	74	368	42	290	54
NAT	5	-0.5624	0.951	-27.4	32.15	74	22.4	12.4	5.5	3176	32	9.8	22.2	26.1	17.9	26.1	17.9	573	87	11	59	242	39	242	39
NGO	17	-0.7733	-0.3594	3.96	17.01	559	24	11.3	7.4	583	31.6	16.5	15.1	23.8	23.8	24.8	23.4	1564	227	22	55	653	94	264	134
NIA	5	-0.4463	1.4633	-12.24	36.98	529	25	10.2	6	1935	33.1	16.3	16.8	26	22.2	27.1	22.2	1243	284	2	110	822	6	286	6
NKK	6	-0.6383	0.8704	-12.88	34.02	867	21.6	10.2	5.8	2158	29.3	11.8	17.5	22.8	19.4	23.8	18.3	1151	261	1	111	748	4	280	9
NOU	16	-0.5743	0.1126	2.52	16.6	478	24.3	10.6	7.9	530	31.2	17.9	13.3	23.9	24.2	25	23.7	1682	219	38	40	615	159	348	543
NYG	11	-0.9631	-0.5296	-2.81	12	228	25.1	9.5	6.6	1376	31.8	17.6	14.2	25.8	22.9	26.4	22.9	1531	294	1	75	657	4	590	4
NYU	17	-0.9729	0.6435	-2.56	29.21	2009	16.8	10.1	8.2	320	23.3	11	12.3	16.8	16.7	17.3	16.5	1567	226	14	50	580	86	280	204
ODZ	17	-0.4523	-1.3125	0.89	14.88	506	24	10.5	8.3	680	30.7	18.1	12.6	23.9	23.1	24.8	23.1	1659	258	37	44	637	190	514	190
OLI	4	-0.7851	0.9847	-24	31.4	323	22.5	13.6	5.5	3493	33	8.7	24.3	26.5	17.5	26.5	17.5	508	92	5	78	269	19	269	19
OMO	5	2.5575	0.9245	6.03	35.76	663	25.5	12.7	7.9	788	34.3	18.3	16	25	26.1	26.7	24.7	936	131	19	45	330	83	125	317
PAMA	4	0.0255	-0.4841	11.4	0.82	187	28.5	13.3	6.5	1824	39.1	18.8	20.3	26.5	27.9	31.2	26.5	866	226	0	108	578	2	124	578
RPON	9	0.3685	-2.235	10.12	-14.17	2	30.3	11.1	5.5	1898	40.7	20.8	19.9	28.6	30.6	33.2	28.6	3363	1060	0	128	2516	3	110	2516
RUA	5	-0.5805	0.9307	-7.5	35	911	22.9	11.7	6.8	1448	31.1	14	17.1	23.9	20.7	24.4	20.7	580	134	0	109	383	0	170	0
RUK	5	-0.565	0.9231	-7	31.2	936	26.1	11.9	7	1216	33.9	16.9	17	26.7	24.2	27.3	24.2	950	202	0	95	511	0	342	0
RUS	9	-0.5133	0.1916	-3.24	29.25	785	25.1	10.7	7.7	417	32.2	18.4	13.8	25	24.8	25.7	24.7	924	143	4	61	389	28	117	97
RUV	9	-0.8937	-0.0601	-3.13	30.38	1566	18.9	11.8	7.7	496	26.8	11.6	15.2	18.5	18.9	19.7	18.5	1112	195	2	67	469	22	134	469
RWEN	10	-0.4675	-1.7337	0.13	30	1675	19.3	11.5	8.7	375	26.2	13.1	13.1	19	19.4	19.7	18.8	1280	157	51	35	442	215	341	388
SAHB	4	-0.0123	-0.5143	14.54	-0.64	346	28.7	14.6	5.7	3053	40.3	14.8	25.5	28.8	24.9	32.6	24.4	392	140	0	138	309	0	68	0
SALO	12	1.6708	0.2725	-2.36	20.97	445	24.4	9.9	8.8	402	30.1	18.9	11.2	24.2	23.9	24.9	23.9	1969	242	67	33	674	252	531	252
SBS	7	0.0378	0.3497	-2	34	1314	22	10.6	7.9	534	28.5	15.2	13.3	22.3	21.2	22.4	21.2	976	162	11	56	394	65	247	65
SELO	12	-0.7412	1.0209	-8.86	37.41	383	24.4	7.9	5.8	1609	30.5	17.1	13.4	25.3	22.4	26.1	22	1260	260	5	92	697	21	441	22
SHIM	5	-0.6912	0.7382	-4.21	39.41	306	24.1	8.5	6.5	1458	30.9	17.9	13	23.8	25.8	25.8	22.1	1092	214	22	57	468	117	117	214
SIM	5	2.7025	1.5112	13.11	38.04	2172	18.1	15.1	7.3	1346	28.8	8.3	20.5	17.5	17.6	20	16.9	903	284	2	126	661	9	113	632
SINM	4	0.0066	-0.4839	10.42	18.2	378	28.3	14.5	6.1	2125	39.7	16.1	23.6	26.6	26.5	31.5	26.4	874	241	0	115	607	1	94	3
SOK	4	-0.0152	-0.566	-3.33	39.86	120	25.2	8.2	6.7	1219	31.7	19.6	12.1	25.2	26.5	26.7	23.6	947	192	16	58	421	88	194	191
SUD	4	0.0023	-0.5003	10	7.5	590	25.3	12.3	6.2	1539	35.1	15.5	19.6	23.8	24.6	27.6	23.8	1330	297	0	98	810	5	229	810
TAI	11	1.0751	-2.0798	5.35	-7.1	181	25.6	8.2	7.5	858	31.6	20.8	10.8	25.8	26.2	26.6	24.3	1795	282	39	47	664	175	375	431
TAM	4	0.0012	-0.495	12.62	2.31	259	28.6	13.8	5.7	2556	40.1	16.3	23.8	27.3	25.7	32.1	25.7	647	194	0	127	478	0	51	0
TON	8	0.3116	0.7316	-5.46	31.8	1131	23.4	12.5	6.9	1142	31.9	13.9	18	23.3	22	25	22	1019	200	0	91	508	1	147	32
TSA	5	-0.5626	0.9474	-2.52	38.5	510	25	11.7	7.3	1402	33.3	17.3	16	25.5	22.9	26.6	22.9	756	176	8	92	359	30	273	30
TSO	11	-1.4119	0.6161	-3.62	12.46	94	25.8	8.5	6.3	1479	32.2	18.8	13.4	26.5	23.5	27.3	23.5	1221	247	0	79	553	3	491	3
VOL	20	-0.9155	0.2697	-1.45	29.42	2694	13.1	10	9.1	215	18.7	7.8	10.9	13.1	13	13.2	12.8	1781	237	37	40	628	177	532	454
VWA	6	-0.6381	0.8615	-11	33.45	1115	21.4	11.7	5.4	2519	31.2	9.7	21.5	22.5	18	24.4	17.8	770	196	1	115	540	4	249	10
WAZ	4	0.0198	-0.4861	11.29	14.69	306	28	14.5	6	2307	40.3	16.2	24.1	26.6	27.3	31.4	25.7	671	217	0	131	513	0	51	0
WBKF	4	-0.0051	-0.5021	11.91	2.2	273	28.1	13.5	6	2238	39.1	16.8	22.3	26.6	26.2	31.5	25.9	808	227	0	115	559	1	97	2
WLU	4	-0.0092	-0.5701	-12.48	24.45	1177	20.8	15.4	6	2222	32	6.6	25.4	22	17.4	22.7	17.4	1235	248	0	97	687	2	261	7
WNI	10	-1.4136	-1.0932	6.5	6	148	25.9	9.1	7.4	1109	32.7	20.5	12.2	24.4	26.4	27.3	24.4	1831	320	11	67	784	61	298	784
WNIG	4	-0.0022	-0.502	12.52	2.66	179	29.1	13.5	5.7	2522	40.5	17.1	23.4	27.8	26.3	32.6	26.3	636	196	0	123	464	0	51	0
ZAK	4	0.0107	-0.4782	10.85	19.7	422	27.8	15.4	6.3	2075	39.6	15.4	24.2	26.2	26.3	31	26	851	256	0	119	598	0	90	2
ZEM	10	2.5425	-2.0442	6.59	25.25	690	24.8	13.5	7.1	903	34.2	15.4	18.8	24.1	24.4	26.1	24	1449	247	4	76	699	23	309	46
ZIN	6	-0.6361	0.8453	-21.59	33.54	143	23.6	13.2	5.9	2986	32.5	10.4	22.1	26.5	20.6	26.5	19.2	658	142	3	95	410	21	347	26

## Sheet: Ungulate NTI NRI
plot	ntaxa	NRI	NTI	LAT	LONG	alt	bio_1	bio_2	bio_3	bio_4	bio_5	bio_6	bio_7	bio_8	bio_9	bio_10	bio_11	bio_12	bio_13	bio_14	bio_15	bio_16	bio_17	bio_18	bio_19
ABER	16	-0.069	0.2563	-0.24	36.5	2368	14.1	14.5	8.1	658	23.4	5.5	17.9	14.4	14.1	14.9	13.2	922	125	31	38	304	116	218	266
ABI-SHA	9	0.8685	0.4748	7.3	38.3	1878	18.6	14.4	7.5	768	27.6	8.4	19.2	17.9	18	19.6	17.9	976	145	14	55	394	65	197	108
ABTL	10	0.9711	0.1703	12.1	18.88	724	27.4	14.7	6.1	2427	39.4	15.4	24	25.5	25.3	30.9	25.2	682	227	0	130	516	0	51	1
ADX	4	1.9238	2.3359	19.31	9.37	654	26.2	15.6	4.9	5568	40.4	8.9	31.5	31.9	20	32.1	18.2	27	11	0	116	23	0	13	0
AIHS	5	-0.499	-0.6649	-27.91	17.15	826	17.1	13.4	5.7	3633	28.4	4.9	23.5	20	14.8	21.4	12.2	84	15	3	40	35	12	21	19
AKA	20	-0.1705	-0.6587	-1.65	30.69	1341	20.9	11.7	8.7	276	27.7	14.3	13.4	20.9	20.8	21.2	20.6	967	169	6	56	382	48	191	314
AMB	20	-0.4764	-1.9216	-2.38	37.14	1196	21.4	12.1	7.2	1363	30.3	13.6	16.7	22.2	19.6	22.8	19.3	604	124	2	79	263	10	262	15
ANG	26	-1.1487	0.1271	-15.5	15.3	1197	22.3	15.9	6	2811	33.7	7.4	26.3	23.9	18.2	25	18	709	159	0	101	442	0	209	0
ANME	4	1.7055	2.0599	15.55	1.7	331	29.2	14.5	5.7	3146	40.7	15.3	25.4	30.2	26	32.8	24.5	231	98	0	154	200	0	27	0
APFR	13	1.6002	0.7388	11.39	1.16	201	28.4	13.3	6.4	1833	39.1	18.6	20.5	26.5	27.7	31.1	26.5	872	227	0	110	585	1	123	585
ARAW	15	-1.5402	-0.4842	-1.43	40.15	90	27.3	10.9	7.1	1304	35	19.8	15.2	27.6	25.5	28.8	25.5	477	90	13	55	181	67	76	67
ARU	16	-2.1916	-1.5007	-3.25	36.83	2231	14.6	10.2	6.6	1428	22.6	7.3	15.3	15.3	12.7	16.1	12.5	1358	334	14	82	701	48	375	61
ATFR	13	1.5737	0.7417	11.56	1.44	186	28.5	13.5	6.3	1960	39.3	18.2	21.1	26.7	27.4	31.5	26.7	860	226	0	111	580	1	118	580
ATNR	4	-0.0784	0.7123	18.83	9.47	990	24.4	15.7	5	5425	38.6	7.4	31.2	29.9	18.4	30.2	16.6	41	17	0	132	34	0	19	0
AWA	15	0.2223	-0.0752	9.2	40.2	823	26.1	15.4	6.6	2098	37.1	13.8	23.3	27.1	24	28.5	23.1	542	128	6	71	261	38	158	39
BAD	15	1.0318	1.7762	12.34	-13.17	74	27.6	13.4	5.7	2213	39	15.7	23.3	26.6	27	30.8	25.1	1386	378	0	116	974	0	63	20
BALE	7	-0.7914	0.7001	6.4	39.4	1950	18.3	15	7.7	716	27.7	8.4	19.3	18.2	17.7	19.2	17.3	1098	169	19	56	407	80	404	93
BAN	23	0.3583	-0.3754	-11.53	30.72	1213	20.6	12.1	5.7	2220	30.9	9.7	21.2	21.7	17.3	23	17.3	1238	292	0	114	835	0	423	0
BASA	14	1.5427	0.1333	10.59	19.42	438	27.7	15.1	6.3	2057	39.4	15.6	23.8	26	26.3	30.9	26	871	250	0	116	605	1	93	2
BAZ	8	0.7188	0.4807	-21.75	35.43	8	23.7	9.4	5.4	2585	31.2	13.8	17.4	26.7	20.6	26.7	20.1	864	166	16	78	481	60	481	73
BBN	13	0.583	2.0426	2.51	14.72	615	23.4	11.2	8.4	565	30.4	17.1	13.3	23.3	23.3	24.2	22.7	1621	241	43	45	614	172	504	438
BEN	15	0.9262	1.3502	8.36	13.82	398	26.1	12.9	6.1	1747	36.3	15.4	20.9	25	24.8	28.8	24.6	1288	274	0	97	779	0	226	3
BF	14	-0.8822	-0.4461	-3.94	29.6	1992	16.3	10.8	7.2	671	23.3	8.5	14.8	16.6	15.3	16.9	15.3	1459	225	4	65	605	31	349	115
BHINE	18	-0.4691	-0.9354	-22.9	32.86	102	24.6	13.9	6.1	3037	34.2	11.7	22.5	27.7	21.6	27.7	20.2	477	102	2	95	296	11	296	15
BIK	17	-0.6017	-1.3016	-15.28	14.76	1254	21.1	15	6	2761	32	7.2	24.8	22.8	17	23.7	17	778	187	0	100	468	0	243	0
BIN	12	0.5476	1.1594	9.63	14.41	257	28.2	12.7	6	2159	39.3	18.4	20.9	26.1	27	31.5	26.1	827	219	0	112	562	0	109	562
BON	10	1.1937	0.7027	10.86	-3.11	270	27.8	12.5	6.5	1652	37.5	18.4	19.1	26	27.3	30.2	26	980	259	1	104	629	5	156	629
BOUH	4	-0.0815	0.7208	34.47	9.61	302	18.1	12.5	3.9	6520	35.3	4	31.3	9.8	26.3	26.4	9.8	186	22	2	44	65	13	26	65
BUD	6	-1.2558	-0.1388	1.73	31.55	1098	23	11.9	8	788	31.1	16.4	14.7	22.1	23.7	24	21.9	1361	180	33	42	462	129	188	397
BUF	12	0.4979	1.345	-12.78	13.81	882	22.1	10.1	6.6	1553	28.5	13.4	15.1	23.4	19.6	23.4	19.6	985	276	0	99	542	1	542	1
CHAM	4	-0.0982	0.6906	35.18	8.71	922	15.7	13	3.8	7151	35.4	1.3	34.1	13.9	25.1	25.1	6.8	351	40	10	27	111	51	51	92
CHO	25	-1.2997	-0.1225	-18	24.5	931	22.1	16.2	5.5	3532	35.2	5.9	29.3	24.5	16.9	25.6	16.9	588	145	0	110	405	1	209	1
CLB	4	1.2839	0.8407	14.41	-3.4	504	26.3	13.9	5.5	2946	38.3	13.1	25.2	26.2	22.2	30.2	22.2	518	170	0	130	403	0	89	0
CMA	14	0.0139	1.1039	2.46	10.3	671	22.3	8.1	7.8	725	27.6	17.3	10.3	21.9	22.8	23	21.2	2252	392	55	57	945	236	544	519
COM	22	-2.123	-2.4211	9.06	3.42	398	26.1	12.1	6.6	1459	35.7	17.5	18.2	24.2	26.4	28.1	24.2	1157	226	5	77	557	21	146	557
CON	13	1.3953	1.3405	-3.9	11.45	56	25.6	7.9	5.8	1630	31.9	18.5	13.4	27.2	23.1	27.2	23.1	1382	243	0	77	612	3	612	3
CONG	13	0.6261	0.7146	2.5	22	389	25.3	10.1	8.1	574	32.1	19.7	12.4	24.7	25.4	26.1	24.5	1715	232	58	38	608	188	345	548
CROS	10	-0.1003	0.1003	5	6	22	26.6	7.8	7.5	940	32.2	21.9	10.3	25.3	27.1	27.8	25.3	3097	490	43	62	1276	169	450	1276
DEUX	11	1.3326	0.5994	11.59	-2.97	276	27.9	13.4	6.2	2031	38.2	16.8	21.4	26.3	26.3	30.9	25.9	891	248	1	108	594	5	126	9
DVGP	9	0.8866	-0.261	-22.53	16.96	1595	19.6	16.9	6	3659	32.3	4.4	27.9	22.7	14.4	23.5	14.4	352	88	0	107	244	3	129	3
ENIG	11	-0.5232	0.9987	5	7.5	51	26.4	8.3	7.6	858	32.3	21.4	10.9	25.2	26.9	27.5	25.2	2557	402	28	61	1114	131	392	1114
ETO	15	-0.5015	0.3977	-19	15.75	1116	22.3	16.8	5.9	3667	34.5	6.4	28.1	24.9	17	26	17	382	99	0	112	264	1	167	1
FADA	4	1.9157	2.4141	16.96	21.4	579	27.9	15.5	5.9	3398	40.2	14.3	25.9	30	24.2	31.4	22.7	72	42	0	169	65	0	24	0
GAM	16	-0.2253	0.045	8	34	419	27.1	14.3	7.3	1287	38.3	18.9	19.4	25.5	27.6	29	25.5	1020	196	3	79	522	17	88	522
GAR	22	-0.4885	1.0168	4.19	29.48	803	24.3	12.2	7.7	1021	33.2	17.5	15.7	23.3	25.3	25.7	23.1	1558	232	19	57	623	76	142	621
GEM	10	0.9385	0.3174	-25.7	20.4	965	20	18.8	5.3	5833	35.4	0.2	35.2	26.2	12	26.9	12	230	48	1	89	136	4	108	4
GHO	24	0.3597	-0.719	-21.66	31.86	402	22.9	13.7	6.2	2959	32.3	10.3	22	26	18.6	26	18.6	581	117	4	90	345	20	345	20
GILE	17	-0.5625	-0.926	-16.53	38.44	120	25.2	10.2	6	2329	33.1	16.3	16.8	27.2	24.3	27.4	21.7	1277	265	12	84	733	48	499	113
GISH	19	-0.6018	-0.2064	-1.75	29.42	2599	13.8	9.8	9	227	19.4	8.6	10.8	13.6	13.7	14	13.5	1658	236	26	43	603	139	365	466
GOLD	13	0.3241	-0.5615	-28.3	28.4	1689	14.1	15.4	5.5	4443	26.2	-1.8	28	18.5	7.9	19.1	7.9	718	116	10	62	316	40	312	40
GOMB	18	-0.3097	-0.2709	-4.66	29.63	1089	22	9.7	7	568	28.7	15	13.7	22	21.5	22.8	21.5	1187	200	2	72	511	15	105	88
GOR	21	0.6879	0.3127	-18.83	34.51	25	25.2	13	6.2	2664	34.7	13.9	20.8	27.7	22.4	27.7	21.2	1064	219	13	87	615	57	513	71
GUS	20	-0.758	-1.1783	7.5	7.5	345	25.4	10.2	6.7	1309	33.3	18.2	15.1	23.9	25.6	27.3	23.9	1358	280	7	76	631	30	170	631
HAD	8	-1.2849	-1.3089	11.6	40	1004	24.2	14.8	6.7	1781	36.1	14.2	21.9	25.1	23	26.5	21.9	638	159	15	84	336	51	187	73
HLU	22	-1.6992	-0.4294	-28.2	31.5	542	19.7	11.5	6.2	2401	28.1	9.6	18.5	21.9	16.7	22.5	16.4	841	123	18	55	347	64	345	65
HWA	22	0.1408	-0.2752	-19.19	26.62	1027	21.2	15.7	5.5	3472	33.7	5.5	28.2	23.5	16.1	24.7	16.1	532	135	0	108	361	1	195	5
ILES	9	0.2764	1.8831	10.95	-14.95	9	27.9	10.9	6.2	1193	36.6	19.1	17.5	26.9	27.6	29.6	26.7	2705	874	0	129	2031	0	46	5
IONA	14	-1.3256	-1.456	-16.5	12.54	467	20.4	9.1	6.1	2039	26.7	12	14.7	22.4	18.3	22.5	17.4	119	35	0	123	90	0	75	0
ITG	20	-1.1042	-0.6548	-8.4	29.2	1053	23.3	11.6	6.5	1268	31.3	13.6	17.7	23.7	21.5	24.6	21.5	1070	201	0	88	536	0	194	20
KAB	12	1.3814	0.5621	11.5	-1.25	264	27.9	12.7	6.2	1884	38.2	17.8	20.4	26	26.9	30.8	26	872	238	1	107	575	7	128	575
KAFF	21	0.0836	-0.2728	-15.5	25.4	1130	20.9	15.2	5.4	3186	33.2	5.4	27.8	23	16.1	23.9	16.1	861	211	0	114	603	0	336	0
KAK	6	1.101	1.4337	0.3	34.85	1568	20.1	16.6	8.7	678	29.8	10.9	18.9	20	20.6	20.9	19.2	1910	258	62	37	693	248	505	565
KALT	4	1.2801	0.8407	-25.62	20.43	969	20.1	18.8	5.3	5808	35.4	0.4	35	26.3	12.1	26.9	12.1	233	48	1	89	136	5	108	5
KAM	18	1.0034	-0.3958	-11.85	21.67	1092	20.7	16.4	6.7	1742	31.5	7.3	24.2	21.7	18	22.1	18	1273	228	0	88	653	2	270	2
KANG	12	0.5421	1.7269	-9.81	16.77	1131	20.9	14	7	763	29.8	9.9	19.9	21.1	19.8	21.4	19.8	1212	211	0	76	511	7	392	22
KAP	20	-1.1794	-1.3298	-24.3	31	512	21.7	13.1	5.7	3240	31.4	8.6	22.8	25.4	17.1	25.4	17.1	528	110	5	82	296	17	296	17
KAS	20	0.4794	0.0613	-12.56	33.84	1201	19.9	10.7	5.9	2126	27.7	9.7	18	21.4	17.7	22	16.6	1077	245	1	109	686	5	283	8
KBIR	19	0.4521	0.966	-3.6	29.32	697	24.9	10.2	7.3	512	31.9	18	13.9	24.8	24.4	25.5	24.3	958	149	4	64	403	28	110	100
KFAL	13	0.0272	0.4929	2.25	31.8	840	24.4	12.2	7.6	898	32.9	17	15.9	23.3	25.1	25.5	23.3	1217	153	25	43	436	106	156	436
KFNP	21	0.0711	-0.2642	-14.4	26.13	1098	20.9	14.7	5.6	2732	32.6	6.5	26.1	22.5	16.9	23.4	16.8	975	234	0	110	658	0	155	3
KHA	13	0.2274	-0.3244	-18.75	20.76	1094	21.8	15.8	5.6	3641	34	5.9	28.1	24.6	16.4	25.3	16.4	526	139	0	110	345	0	156	0
KIB	22	-0.7252	-1.2998	0.53	30.38	1440	19.9	12	8.5	377	27.3	13.3	14	19.7	20.1	20.4	19.5	1356	200	49	44	534	193	338	227
KID	19	-0.0424	-1.3063	3.53	33.5	1106	23.4	12.5	7.6	1163	32.7	16.4	16.3	22	24.5	25.1	22	892	137	12	57	374	52	93	374
KILI	9	-0.5729	-0.7211	-3	37.5	2690	12.1	10	6.7	1352	19.8	5	14.8	13	10.2	13.6	10.2	1301	253	12	81	558	41	382	41
KIS	9	0.1124	1.3456	-9.77	13.62	200	24	6.9	5.3	2162	29.9	16.9	13	26.1	20.8	26.1	20.8	803	232	0	111	503	0	503	0
KIZ	26	1.2976	0.2467	-6.37	34.28	1311	21.6	12.2	7	1296	29.8	12.4	17.4	22.4	19.6	23	19.6	601	141	0	111	387	0	167	0
KOR	9	0.5235	0.9593	5.1	8.51	74	26.2	8.4	7.9	712	32.2	21.6	10.6	25.3	26.3	27.2	25.3	2746	418	30	60	1174	127	416	1174
KOU	13	1.6098	0.7467	11.55	1.95	213	28.3	13.4	6.2	2062	39.2	17.6	21.6	26.6	27	31.5	26.5	880	238	0	112	598	1	117	2
LCHIL	18	-0.4073	-0.977	-15.16	35.41	951	21.2	10.3	5.7	2221	29.7	11.9	17.8	22.7	19.1	23.6	17.9	1212	270	6	103	775	20	378	21
LEF	11	-0.8556	0.9269	-2.96	15.42	628	23.6	9.9	7.5	782	29.8	16.6	13.2	24.5	22.4	24.5	22.4	1828	246	10	56	674	66	674	66
LEN	17	0.0701	-0.3859	-16.16	34.45	282	25.3	11.9	5.6	2756	35.5	14.4	21.1	27.4	22.9	28.3	21.3	798	182	4	100	511	20	255	30
LIN	19	0.4192	-1.2888	-18.11	23.24	964	22	15.9	5.5	3621	34.5	5.9	28.6	24.7	16.6	25.4	16.6	559	132	0	109	376	1	191	1
LIW	16	-1.7168	-1.5305	-14.5	35.2	499	24.2	10.9	5.6	2432	33.4	14.2	19.2	25.7	20.6	26.9	20.6	846	214	2	114	588	8	239	8
LMAG	14	-0.5713	-1.1557	-1.86	36.26	616	25.1	13.5	7.7	1189	34.1	16.7	17.4	25.8	23.2	26.3	23.2	475	111	4	78	240	15	233	15
LMNY	16	-1.0849	-2.1662	-3.5	35.83	957	22.2	11.6	7.1	1507	30.3	14	16.3	23.6	20.4	23.6	19.9	624	146	1	87	317	6	317	8
LNAK	14	0.5801	-0.326	-1	36.5	1706	18.4	13.7	7.6	1243	27.9	10.1	17.8	19.1	16.7	19.7	16.5	824	183	20	72	424	71	180	86
LNHG	16	0.7959	-0.8104	-0.88	36.3	1976	16.7	14.4	7.9	1140	26.5	8.3	18.2	17.5	15.2	18	15	686	149	23	61	323	82	256	92
LOP	13	1.5398	1.4785	-0.16	11.85	239	25.9	9.6	7.5	929	32.2	19.5	12.7	26.1	24.4	26.7	24.4	1558	280	2	69	693	28	535	28
LTCR	13	0.5826	2.0276	1.1	17.26	334	25.1	10.1	8.5	546	31.5	19.7	11.8	24.7	25.3	25.8	24.4	1731	196	68	31	583	250	431	454
LUA	17	2.1267	1.9088	-11.11	17.62	1174	20.9	13.8	6.3	1192	30.5	8.9	21.6	21.2	19.2	21.9	19.1	1301	224	0	80	610	4	360	18
MAD	13	1.5248	0.7102	11.37	1.27	170	28.6	13.3	6.4	1840	39.3	18.7	20.6	26.7	27.9	31.3	26.7	876	227	0	109	587	1	123	587
MAGO	23	-0.7046	-0.0091	5.4	36.1	416	27.6	12	7.7	844	36.1	20.7	15.4	28.1	28.3	28.9	26.8	575	94	15	47	235	67	100	135
MAH	18	-1.3576	-0.59	-18.22	21.66	1034	21.8	15.6	5.6	3460	33.9	6.2	27.7	24.4	16.6	25	16.6	562	140	0	109	367	0	170	0
MAJ	17	0.0882	-0.0864	-15.56	34.35	772	22.9	11.1	5.6	2321	32.7	13.2	19.5	24.4	20.9	25.5	19.5	1063	226	7	98	663	31	329	41
MAK	14	0.0333	1.234	-0.66	12.72	349	24.9	8.7	7.5	958	30.7	19.1	11.6	25.1	23.3	25.8	23.3	1658	265	5	60	679	49	564	49
MAM	19	0.3547	0.5182	-18.41	23.68	945	22	16	5.5	3692	34.8	5.8	29	24.7	16.5	25.6	16.5	535	130	0	110	363	0	182	0
MAN	21	-0.0438	-0.7063	-15.98	29.44	463	24.1	13.5	5.3	3177	35.7	10.5	25.2	25.9	19.6	27.6	19.5	699	186	0	123	524	0	247	0
MAND	15	1.0356	1.6291	9.32	19.97	392	27.3	14.3	6.3	1717	38.8	16.4	22.4	25.6	26.9	29.9	25.6	1030	246	0	103	658	1	142	658
MAP	13	-1.2041	-1.3101	-26.39	32.81	5	22.6	10.4	5.8	2479	30.7	13	17.7	25.5	19.8	25.5	19.2	786	127	24	50	332	94	332	95
MARE	11	0.5062	-0.1037	11.59	-4.15	294	27.6	13.9	6.1	2044	38	15.4	22.6	26.4	25.5	30.6	25.5	921	248	0	109	610	3	127	7
MARO	17	-0.5028	-0.914	-18.77	35.95	3	25.2	10	6.1	2262	32.5	16.2	16.3	27.4	24.3	27.6	21.9	1095	236	16	78	587	60	570	109
MARS	15	-0.6705	-1.4375	2.32	37.98	1420	19.6	15.2	8.2	924	29.2	10.7	18.5	20.5	18.4	20.8	18.4	851	235	8	93	405	39	337	41
MASF	11	0.8237	2.5069	8.3	-9.36	900	22.2	14.8	6.9	750	32.7	11.4	21.3	21.6	21.7	23.1	21.5	2465	428	21	64	1177	128	372	210
MASM	27	-0.7522	-1.9309	-1.3	35.1	1579	19.6	14.2	8.5	735	28.1	11.5	16.6	20.1	18.6	20.4	18.5	1081	172	32	42	411	140	305	149
MAT	16	-0.702	0.0333	-16.95	28.61	986	22.2	13	5.4	2653	33.8	9.9	23.9	23.2	18.5	25.3	18.5	762	196	0	116	546	2	98	7
MATO	17	-1.6941	0.8879	-20.55	28.54	1295	18.4	14.5	5.6	3441	29.5	3.8	25.7	21.2	13.3	21.6	13.3	578	131	1	99	364	5	230	10
MAV	18	0.9118	-0.6842	-15.5	20.93	1146	20.7	16.5	6	2908	32.6	5.1	27.5	22.7	16.3	23.3	16.3	833	194	0	110	553	0	273	0
MED	16	0.5254	1.6912	5.86	12.77	763	23.9	10.6	7.4	911	31.9	17.7	14.2	23.1	24.5	25.1	22.7	1582	282	3	74	762	24	207	713
MER	24	-2.2978	-0.8943	0.08	38.33	471	25	15.2	8.2	1010	34.4	15.9	18.5	25.4	23.6	26.2	23.6	458	150	0	124	256	0	168	0
MGSF	22	-0.4341	-1.0304	8.89	21.43	474	26.7	14.5	6.3	1674	38.4	15.5	22.9	25.2	26.4	29.1	25.2	1090	238	0	97	660	2	172	660
MHA	10	1.1335	0.8983	-6.12	29.5	760	23.9	9.8	6.4	1043	30.6	15.5	15.1	24.2	22.3	24.9	22.3	1031	188	1	79	458	9	221	9
MIKU	15	-1.2559	-1.7418	-7.2	37.13	495	24.5	9.5	6.3	1705	31.4	16.5	14.9	25.6	22	26.3	22	973	197	5	80	506	27	333	27
MNDL	14	1.5585	0.4008	11.56	15.22	305	28.2	14.9	5.8	2515	40.7	15.3	25.4	27	27.1	31.7	25.3	579	185	0	129	450	0	40	0
MNIM	14	0.0217	1.8376	7.4	-8.23	371	24.9	13.1	7.1	839	34.1	15.7	18.4	23.8	24.8	25.9	23.8	1968	357	15	67	952	96	408	952
MOC	10	-0.3171	-1.6312	-15.71	12.4	267	21	8.7	5.7	2264	28	12.8	15.2	23.3	18.9	23.6	17.8	101	31	0	113	72	0	68	0
MTAS	15	0.3068	0.8199	12.88	-12.76	160	27.8	13.1	5.7	2305	39.1	16.4	22.7	26.5	27.4	31.2	25.4	1061	294	0	121	773	0	41	7
MTE	8	-1.4469	0.1039	1.13	34.7	2914	12.8	12.2	8.2	666	21	6.3	14.7	11.9	13.3	13.6	11.9	1595	231	40	44	567	159	213	565
MTFO	12	0.207	0.0366	-2.78	11.67	178	25.5	9.7	6.7	1364	32.3	17.9	14.4	26.1	23.3	26.8	23.3	1547	294	1	75	664	4	593	4
MUD	19	-0.3255	-0.7425	-18.09	23.53	956	21.9	16.1	5.5	3681	34.6	5.6	29	24.7	16.4	25.4	16.4	566	135	0	108	383	1	193	1
MUPA	19	-0.3374	-1.2883	-15.91	15.59	1188	22.7	16.6	6.1	2767	34.5	7.4	27.1	24.1	18.5	25.4	18.5	686	154	0	104	439	0	188	0
MUSH	15	-0.1398	0.1364	-8.68	29.44	1134	23	11.7	6.5	1290	31.1	13.2	17.9	23.3	21.1	24.3	21.1	1128	210	0	88	566	0	203	20
MWA	19	-0.2361	-0.0773	-8.41	29.26	1398	21.7	11.4	6.5	1198	29.6	12.2	17.4	22	20	23	19.9	1149	216	0	88	573	0	211	21
MWAB	18	-0.4486	-1.3965	-16.72	35.01	169	25.4	12.7	5.8	2793	35.8	14	21.8	27.6	23	28.3	21.3	979	199	9	91	587	41	311	55
NAI	20	0.5562	-1.7271	-1.37	36.85	1639	19	12.4	7.3	1213	27.8	11	16.8	20	17.4	20.4	17.2	764	165	11	74	368	42	290	54
NAM	4	-0.8326	-0.7577	-21.5	14.4	444	19.9	13.7	7	1980	28.8	9.5	19.3	22.3	18	22.3	17.3	40	14	0	118	33	0	33	0
NAT	12	1.514	0.6933	-27.4	32.15	74	22.4	12.4	5.5	3176	32	9.8	22.2	26.1	17.9	26.1	17.9	573	87	11	59	242	39	242	39
NAUK	9	-0.5428	-1.5702	-24.58	15.43	808	16.9	13	6.7	2399	26	6.7	19.3	19.9	14	19.9	13.7	61	19	1	93	42	3	42	4
NGCR	17	-1.5836	-1.2509	-3.2	35.46	2145	15.4	9.3	6.6	1318	22.4	8.4	14	16.6	13.8	16.6	13.4	957	198	8	76	444	26	444	35
NGO	18	0.3911	1.9994	3.96	17.01	559	24	11.3	7.4	583	31.6	16.5	15.1	23.8	23.8	24.8	23.4	1564	227	22	55	653	94	264	134
NIA	19	-0.2264	-0.7313	-12.24	36.98	529	25	10.2	6	1935	33.1	16.3	16.8	26	22.2	27.1	22.2	1243	284	2	110	822	6	286	6
NKK	19	-0.2599	-0.5676	-12.88	34.02	867	21.6	10.2	5.8	2158	29.3	11.8	17.5	22.8	19.4	23.8	18.3	1151	261	1	111	748	4	280	9
NOU	13	0.6098	2.0519	2.52	16.6	478	24.3	10.6	7.9	530	31.2	17.9	13.3	23.9	24.2	25	23.7	1682	219	38	40	615	159	348	543
NYG	11	-0.1188	-0.5872	-2.81	12	228	25.1	9.5	6.6	1376	31.8	17.6	14.2	25.8	22.9	26.4	22.9	1531	294	1	75	657	4	590	4
NYK	14	-0.3619	0.1989	-10.8	33	820	23.2	11.2	5.4	2350	33.1	12.4	20.7	24.2	21.4	26.1	20	870	210	1	113	593	3	287	4
NYU	18	-0.75	-0.2525	-2.56	29.21	2009	16.8	10.1	8.2	320	23.3	11	12.3	16.8	16.7	17.3	16.5	1567	226	14	50	580	86	280	204
ODZ	15	1.0125	2.2936	0.89	14.88	506	24	10.5	8.3	680	30.7	18.1	12.6	23.9	23.1	24.8	23.1	1659	258	37	44	637	190	514	190
OKA	21	-0.9272	-0.7751	-19	23	963	22.2	15.8	5.5	3798	34.6	6.3	28.3	25.2	16.6	25.8	16.6	473	110	0	104	309	1	161	1
OLI	26	-1.1617	0.5024	-24	31.4	323	22.5	13.6	5.5	3493	33	8.7	24.3	26.5	17.5	26.5	17.5	508	92	5	78	269	19	269	19
OMO	20	-0.2421	-1.4096	6.03	35.76	663	25.5	12.7	7.9	788	34.3	18.3	16	25	26.1	26.7	24.7	936	131	19	45	330	83	125	317
OROA	5	1.8719	2.2039	15.77	19	344	29.3	15.2	5.7	3487	41.6	15.1	26.5	30.8	25.6	33.1	24	77	39	0	163	69	0	8	0
PAMA	14	0.9489	-0.0957	11.4	0.82	187	28.5	13.3	6.5	1824	39.1	18.8	20.3	26.5	27.9	31.2	26.5	866	226	0	108	578	2	124	578
RPON	9	0.2244	2.2195	10.12	-14.17	2	30.3	11.1	5.5	1898	40.7	20.8	19.9	28.6	30.6	33.2	28.6	3363	1060	0	128	2516	3	110	2516
RUA	20	-0.5064	-1.9803	-7.5	35	911	22.9	11.7	6.8	1448	31.1	14	17.1	23.9	20.7	24.4	20.7	580	134	0	109	383	0	170	0
RUK	23	0.2633	-0.5221	-7	31.2	936	26.1	11.9	7	1216	33.9	16.9	17	26.7	24.2	27.3	24.2	950	202	0	95	511	0	342	0
RUS	17	-0.4531	-0.0891	-3.24	29.25	785	25.1	10.7	7.7	417	32.2	18.4	13.8	25	24.8	25.7	24.7	924	143	4	61	389	28	117	97
RUV	19	-0.2219	-0.3572	-3.13	30.38	1566	18.9	11.8	7.7	496	26.8	11.6	15.2	18.5	18.9	19.7	18.5	1112	195	2	67	469	22	134	469
RWEN	15	-0.2614	1.1479	0.13	30	1675	19.3	11.5	8.7	375	26.2	13.1	13.1	19	19.4	19.7	18.8	1280	157	51	35	442	215	341	388
SAH	7	-0.2143	0.094	13.3	13.2	295	27.1	15.1	5.6	3413	39.2	12.4	26.8	28.1	24.1	31	22	293	134	0	163	257	0	30	0
SAHB	4	1.8296	2.1509	14.54	-0.64	346	28.7	14.6	5.7	3053	40.3	14.8	25.5	28.8	24.9	32.6	24.4	392	140	0	138	309	0	68	0
SALO	11	0.9175	1.0875	-2.36	20.97	445	24.4	9.9	8.8	402	30.1	18.9	11.2	24.2	23.9	24.9	23.9	1969	242	67	33	674	252	531	252
SAM	12	-1.7573	-2.156	0.57	37.57	877	23.8	16.7	8.7	680	33.7	14.7	19	23.5	23.2	24.6	23	482	126	4	95	223	15	179	16
SBS	25	-0.4393	-1.4351	-2	34	1314	22	10.6	7.9	534	28.5	15.2	13.3	22.3	21.2	22.4	21.2	976	162	11	56	394	65	247	65
SELO	27	0.8322	-0.0294	-8.86	37.41	383	24.4	7.9	5.8	1609	30.5	17.1	13.4	25.3	22.4	26.1	22	1260	260	5	92	697	21	441	22
SHIM	5	1.6177	1.6798	-4.21	39.41	306	24.1	8.5	6.5	1458	30.9	17.9	13	23.8	25.8	25.8	22.1	1092	214	22	57	468	117	117	214
SIM	6	0.1924	-0.3388	13.11	38.04	2172	18.1	15.1	7.3	1346	28.8	8.3	20.5	17.5	17.6	20	16.9	903	284	2	126	661	9	113	632
SING	13	0.9035	-0.1381	11.64	0.98	218	28.3	13.4	6.3	1930	39.1	18.1	21	26.5	27.3	31.3	26.5	841	225	0	110	570	1	115	570
SINM	11	1.2388	0.3817	10.42	18.2	378	28.3	14.5	6.1	2125	39.7	16.1	23.6	26.6	26.5	31.5	26.4	874	241	0	115	607	1	94	3
SKE	6	0.5071	-0.0696	-19.17	12.84	433	18	6.8	5.5	1854	23.5	11.2	12.3	20.2	15.4	20.2	15.4	52	20	0	120	41	0	41	0
SOK	8	0.3119	0.2695	-3.33	39.86	120	25.2	8.2	6.7	1219	31.7	19.6	12.1	25.2	26.5	26.7	23.6	947	192	16	58	421	88	194	191
SP	8	-0.6659	-0.4339	-2.19	34.5	1301	22	11.3	7.9	675	29	14.7	14.3	22.5	20.9	22.5	20.9	882	149	13	53	363	77	298	77
SSG	13	-0.6663	-1.123	-26.35	25.4	1364	17.7	16	5.3	4783	30.5	0.7	29.8	22.2	11	22.8	11	519	101	2	75	255	12	255	12
SUD	16	-0.0172	-1.4884	10	7.5	590	25.3	12.3	6.2	1539	35.1	15.5	19.6	23.8	24.6	27.6	23.8	1330	297	0	98	810	5	229	810
SWA	22	-1.8004	-0.7288	-26	20	965	19.7	18.8	5.3	5872	35.2	-0.1	35.3	25.9	13.9	26.6	11.7	211	50	1	98	135	3	103	4
TAI	14	0.1877	1.0276	5.35	-7.1	181	25.6	8.2	7.5	858	31.6	20.8	10.8	25.8	26.2	26.6	24.3	1795	282	39	47	664	175	375	431
TAM	13	0.81	-0.2001	12.62	2.31	259	28.6	13.8	5.7	2556	40.1	16.3	23.8	27.3	25.7	32.1	25.7	647	194	0	127	478	0	51	0
TAR	22	0.7282	-0.0368	-4	36	1219	20.7	11.5	7	1555	28.7	12.4	16.3	22	18.8	22	18.3	781	191	1	90	410	6	298	8
TAS	4	-0.0744	0.7232	24.64	9.7	1667	19.8	13.6	4.1	6936	35	2	33	15.9	27.8	27.8	10.1	40	7	1	37	15	6	6	10
TON	14	-1.0159	-0.4697	-5.46	31.8	1131	23.4	12.5	6.9	1142	31.9	13.9	18	23.3	22	25	22	1019	200	0	91	508	1	147	32
TSA	24	-0.2062	-1.1249	-2.52	38.5	510	25	11.7	7.3	1402	33.3	17.3	16	25.5	22.9	26.6	22.9	756	176	8	92	359	30	273	30
TSO	8	0.0808	0.1261	-3.62	12.46	94	25.8	8.5	6.3	1479	32.2	18.8	13.4	26.5	23.5	27.3	23.5	1221	247	0	79	553	3	491	3
VOL	26	-0.1661	-0.9992	-1.45	29.42	2694	13.1	10	9.1	215	18.7	7.8	10.9	13.1	13	13.2	12.8	1781	237	37	40	628	177	532	454
VWA	18	0.2424	0.4951	-11	33.45	1115	21.4	11.7	5.4	2519	31.2	9.7	21.5	22.5	18	24.4	17.8	770	196	1	115	540	4	249	10
WAZ	12	1.3214	-0.0524	11.29	14.69	306	28	14.5	6	2307	40.3	16.2	24.1	26.6	27.3	31.4	25.7	671	217	0	131	513	0	51	0
WBKF	14	0.9599	-0.0536	11.91	2.2	273	28.1	13.5	6	2238	39.1	16.8	22.3	26.6	26.2	31.5	25.9	808	227	0	115	559	1	97	2
WLU	20	-0.0387	-0.2432	-12.48	24.45	1177	20.8	15.4	6	2222	32	6.6	25.4	22	17.4	22.7	17.4	1235	248	0	97	687	2	261	7
WNI	10	-0.7659	0.3931	6.5	6	148	25.9	9.1	7.4	1109	32.7	20.5	12.2	24.4	26.4	27.3	24.4	1831	320	11	67	784	61	298	784
WNIG	13	1.5446	0.7386	12.52	2.66	179	29.1	13.5	5.7	2522	40.5	17.1	23.4	27.8	26.3	32.6	26.3	636	196	0	123	464	0	51	0
WPP	12	1.4401	0.8459	-20.44	17.25	1701	18.7	16.5	6.2	3434	30.2	3.6	26.6	21.3	13.7	22.2	13.7	440	103	0	106	295	0	193	0
YAN-RAS	15	-1.1513	-0.4779	11	40.5	584	26.2	13.8	6.2	2271	37.9	15.7	22.2	27.7	24.4	29	23.2	431	121	6	92	243	24	128	45
ZAK	14	0.3335	-0.9233	10.85	19.7	422	27.8	15.4	6.3	2075	39.6	15.4	24.2	26.2	26.3	31	26	851	256	0	119	598	0	90	2
ZEM	19	0.261	1.8771	6.59	25.25	690	24.8	13.5	7.1	903	34.2	15.4	18.8	24.1	24.4	26.1	24	1449	247	4	76	699	23	309	46
ZIN	20	-0.2102	-0.9335	-21.59	33.54	143	23.6	13.2	5.9	2986	32.5	10.4	22.1	26.5	20.6	26.5	19.2	658	142	3	95	410	21	347	26

## Sheet: Mammal Comm Species Comp
SiteCode	Species
ABER	Aepyceros_melampus
ABER	Aonyx_capensis
ABER	Atilax_paludinosus
ABER	Canis_adustus
ABER	Canis_mesomelas
ABER	Cephalophus_monticola
ABER	Cercopithecus_mitis
ABER	Chlorocebus_aethiops
ABER	Civettictis_civetta
ABER	Colobus_guereza
ABER	Cricetomys_gambianus
ABER	Crocuta_crocuta
ABER	Dendrohyrax_arboreus
ABER	Diceros_bicornis
ABER	Felis_silvestris
ABER	Galerella_sanguinea
ABER	Genetta_tigrina
ABER	Heterohyrax_brucei
ABER	Hylochoerus_meinertzhageni
ABER	Hystrix_cristata
ABER	Ichneumia_albicauda
ABER	Ictonyx_striatus
ABER	Kobus_ellipsiprymnus
ABER	Lepus_capensis
ABER	Loxodonta_africana
ABER	Lycaon_pictus
ABER	Nandinia_binotata
ABER	Neotragus_moschatus
ABER	Oreotragus_oreotragus
ABER	Orycteropus_afer
ABER	Otolemur_crassicaudatus
ABER	Panthera_pardus
ABER	Papio_anubis
ABER	Potamochoerus_larvatus
ABER	Raphicerus_campestris
ABER	Redunca_fulvorufula
ABER	Redunca_redunca
ABER	Sylvicapra_grimmia
ABER	Syncerus_caffer
ABER	Taurotragus_oryx
ABER	Tragelaphus_eurycerus
ABER	Tragelaphus_scriptus
ABI-SHA	Aonyx_capensis
ABI-SHA	Atilax_paludinosus
ABI-SHA	Canis_adustus
ABI-SHA	Canis_aureus
ABI-SHA	Caracal_caracal
ABI-SHA	Chlorocebus_aethiops
ABI-SHA	Civettictis_civetta
ABI-SHA	Colobus_guereza
ABI-SHA	Crocuta_crocuta
ABI-SHA	Felis_silvestris
ABI-SHA	Galerella_sanguinea
ABI-SHA	Gazella_granti
ABI-SHA	Genetta_genetta
ABI-SHA	Genetta_maculata
ABI-SHA	Herpestes_ichneumon
ABI-SHA	Ichneumia_albicauda
ABI-SHA	Ictonyx_striatus
ABI-SHA	Leptailurus_serval
ABI-SHA	Mellivora_capensis
ABI-SHA	Oreotragus_oreotragus
ABI-SHA	Orycteropus_afer
ABI-SHA	Otocyon_megalotis
ABI-SHA	Ourebia_ourebi
ABI-SHA	Panthera_pardus
ABI-SHA	Papio_anubis
ABI-SHA	Phacochoerus_africanus
ABI-SHA	Procavia_capensis
ABI-SHA	Redunca_fulvorufula
ABI-SHA	Redunca_redunca
ABI-SHA	Sylvicapra_grimmia
ABI-SHA	Tragelaphus_scriptus
ABI-SHA	Tragelaphus_strepsiceros
ABTL	Acinonyx_jubatus
ABTL	Alcelaphus_buselaphus
ABTL	Atelerix_albiventris
ABTL	Canis_aureus
ABTL	Caracal_caracal
ABTL	Chlorocebus_aethiops
ABTL	Crocuta_crocuta
ABTL	Damaliscus_lunatus
ABTL	Erythrocebus_patas
ABTL	Felis_silvestris
ABTL	Galago_senegalensis
ABTL	Galerella_sanguinea
ABTL	Gazella_rufifrons
ABTL	Genetta_genetta
ABTL	Giraffa_camelopardalis
ABTL	Hippotragus_equinus
ABTL	Hyaena_hyaena
ABTL	Hystrix_cristata
ABTL	Ictonyx_striatus
ABTL	Leptailurus_serval
ABTL	Lepus_capensis
ABTL	Lepus_victoriae
ABTL	Mellivora_capensis
ABTL	Mungos_mungo
ABTL	Orycteropus_afer
ABTL	Panthera_leo
ABTL	Panthera_pardus
ABTL	Papio_anubis
ABTL	Phacochoerus_africanus
ABTL	Procavia_capensis
ABTL	Redunca_redunca
ABTL	Sylvicapra_grimmia
ABTL	Tragelaphus_scriptus
ABTL	Tragelaphus_strepsiceros
ADX	Acinonyx_jubatus
ADX	Addax_nasomaculatus
ADX	Canis_aureus
ADX	Caracal_caracal
ADX	Erythrocebus_patas
ADX	Felis_margarita
ADX	Felis_silvestris
ADX	Gazella_dama
ADX	Gazella_dorcas
ADX	Gazella_leptoceros
ADX	Hyaena_hyaena
ADX	Ictonyx_libyca
ADX	Lepus_capensis
ADX	Panthera_pardus
ADX	Procavia_capensis
ADX	Vulpes_rueppellii
ADX	Vulpes_zerda
AIHS	Antidorcas_marsupialis
AIHS	Aonyx_capensis
AIHS	Canis_mesomelas
AIHS	Caracal_caracal
AIHS	Chlorocebus_aethiops
AIHS	Cynictis_penicillata
AIHS	Equus_zebra
AIHS	Felis_nigripes
AIHS	Felis_silvestris
AIHS	Galerella_pulverulenta
AIHS	Genetta_genetta
AIHS	Hystrix_africaeaustralis
AIHS	Ictonyx_striatus
AIHS	Lepus_capensis
AIHS	Lepus_saxatilis
AIHS	Mellivora_capensis
AIHS	Oreotragus_oreotragus
AIHS	Orycteropus_afer
AIHS	Otocyon_megalotis
AIHS	Panthera_pardus
AIHS	Papio_ursinus
AIHS	Parahyaena_brunnea
AIHS	Procavia_capensis
AIHS	Pronolagus_rupestris
AIHS	Proteles_cristatus
AIHS	Raphicerus_campestris
AIHS	Suricata_suricatta
AIHS	Sylvicapra_grimmia
AIHS	Vulpes_chama
AKA	Aepyceros_melampus
AKA	Aonyx_capensis
AKA	Atherurus_africanus
AKA	Atilax_paludinosus
AKA	Canis_adustus
AKA	Canis_aureus
AKA	Canis_mesomelas
AKA	Cephalophus_monticola
AKA	Cephalophus_nigrifrons
AKA	Cercopithecus_ascanius
AKA	Cercopithecus_mitis
AKA	Chlorocebus_aethiops
AKA	Civettictis_civetta
AKA	Colobus_angolensis
AKA	Colobus_guereza
AKA	Crocuta_crocuta
AKA	Damaliscus_lunatus
AKA	Dendrohyrax_arboreus
AKA	Equus_burchellii
AKA	Felis_silvestris
AKA	Galago_moholi
AKA	Galago_senegalensis
AKA	Galagoides_demidoff
AKA	Galagoides_thomasi
AKA	Galerella_sanguinea
AKA	Genetta_genetta
AKA	Genetta_servalina
AKA	Genetta_tigrina
AKA	Giraffa_camelopardalis
AKA	Helogale_parvula
AKA	Herpestes_ichneumon
AKA	Hippopotamus_amphibius
AKA	Hippotragus_equinus
AKA	Hyaena_hyaena
AKA	Hystrix_africaeaustralis
AKA	Hystrix_cristata
AKA	Ichneumia_albicauda
AKA	Ictonyx_striatus
AKA	Kobus_ellipsiprymnus
AKA	Leptailurus_serval
AKA	Lepus_capensis
AKA	Lepus_victoriae
AKA	Loxodonta_africana
AKA	Lutra_maculicollis
AKA	Manis_gigantea
AKA	Manis_tricuspis
AKA	Mellivora_capensis
AKA	Mungos_mungo
AKA	Nandinia_binotata
AKA	Oreotragus_oreotragus
AKA	Orycteropus_afer
AKA	Otolemur_crassicaudatus
AKA	Ourebia_ourebi
AKA	Pan_troglodytes
AKA	Panthera_leo
AKA	Panthera_pardus
AKA	Papio_anubis
AKA	Perodicticus_potto
AKA	Phacochoerus_africanus
AKA	Piliocolobus_badius
AKA	Poecilogale_albinucha
AKA	Poelagus_marjorita
AKA	Potamochoerus_larvatus
AKA	Potamogale_velox
AKA	Procavia_capensis
AKA	Profelis_aurata
AKA	Redunca_redunca
AKA	Sylvicapra_grimmia
AKA	Syncerus_caffer
AKA	Taurotragus_oryx
AKA	Tragelaphus_scriptus
AKA	Tragelaphus_spekii
AKA	Tragelaphus_strepsiceros
AMB	Acinonyx_jubatus
AMB	Aepyceros_melampus
AMB	Alcelaphus_buselaphus
AMB	Atilax_paludinosus
AMB	Canis_aureus
AMB	Canis_mesomelas
AMB	Caracal_caracal
AMB	Chlorocebus_aethiops
AMB	Civettictis_civetta
AMB	Connochaetes_taurinus
AMB	Crocuta_crocuta
AMB	Diceros_bicornis
AMB	Equus_burchellii
AMB	Felis_silvestris
AMB	Galago_senegalensis
AMB	Gazella_granti
AMB	Gazella_thomsonii
AMB	Genetta_genetta
AMB	Giraffa_camelopardalis
AMB	Hippopotamus_amphibius
AMB	Hyaena_hyaena
AMB	Hystrix_cristata
AMB	Ichneumia_albicauda
AMB	Ictonyx_striatus
AMB	Kobus_ellipsiprymnus
AMB	Leptailurus_serval
AMB	Lepus_capensis
AMB	Litocranius_walleri
AMB	Loxodonta_africana
AMB	Madoqua_kirkii
AMB	Mellivora_capensis
AMB	Orycteropus_afer
AMB	Oryx_gazella
AMB	Otocyon_megalotis
AMB	Panthera_leo
AMB	Panthera_pardus
AMB	Papio_cynocephalus
AMB	Pedetes_capensis
AMB	Phacochoerus_africanus
AMB	Proteles_cristatus
AMB	Raphicerus_campestris
AMB	Redunca_redunca
AMB	Syncerus_caffer
AMB	Taurotragus_oryx
AMB	Tragelaphus_imberbis
AMB	Tragelaphus_scriptus
ANG	Acinonyx_jubatus
ANG	Aepyceros_melampus
ANG	Alcelaphus_buselaphus
ANG	Caracal_caracal
ANG	Ceratotherium_simum
ANG	Chlorocebus_aethiops
ANG	Civettictis_civetta
ANG	Connochaetes_taurinus
ANG	Crocuta_crocuta
ANG	Damaliscus_lunatus
ANG	Diceros_bicornis
ANG	Equus_burchellii
ANG	Felis_silvestris
ANG	Galago_moholi
ANG	Galerella_sanguinea
ANG	Genetta_angolensis
ANG	Genetta_genetta
ANG	Giraffa_camelopardalis
ANG	Helogale_parvula
ANG	Herpestes_ichneumon
ANG	Hippopotamus_amphibius
ANG	Hippotragus_equinus
ANG	Hippotragus_niger
ANG	Hystrix_africaeaustralis
ANG	Ichneumia_albicauda
ANG	Ictonyx_striatus
ANG	Kobus_ellipsiprymnus
ANG	Kobus_leche
ANG	Kobus_vardonii
ANG	Leptailurus_serval
ANG	Lepus_saxatilis
ANG	Loxodonta_africana
ANG	Lycaon_pictus
ANG	Manis_temminckii
ANG	Mellivora_capensis
ANG	Mungos_mungo
ANG	Orycteropus_afer
ANG	Otolemur_crassicaudatus
ANG	Ourebia_ourebi
ANG	Panthera_leo
ANG	Panthera_pardus
ANG	Papio_ursinus
ANG	Paracynictis_selousi
ANG	Parahyaena_brunnea
ANG	Pedetes_capensis
ANG	Phacochoerus_africanus
ANG	Potamochoerus_larvatus
ANG	Proteles_cristatus
ANG	Raphicerus_campestris
ANG	Redunca_arundinum
ANG	Sigmoceros_lichtensteinii
ANG	Sylvicapra_grimmia
ANG	Syncerus_caffer
ANG	Taurotragus_oryx
ANG	Thryonomys_swinderianus
ANG	Tragelaphus_scriptus
ANG	Tragelaphus_spekii
ANG	Tragelaphus_strepsiceros
ANME	Aonyx_capensis
ANME	Atelerix_albiventris
ANME	Atilax_paludinosus
ANME	Canis_adustus
ANME	Canis_aureus
ANME	Caracal_caracal
ANME	Crocuta_crocuta
ANME	Erythrocebus_patas
ANME	Felis_silvestris
ANME	Galago_senegalensis
ANME	Gazella_dama
ANME	Gazella_dorcas
ANME	Gazella_rufifrons
ANME	Genetta_genetta
ANME	Giraffa_camelopardalis
ANME	Herpestes_ichneumon
ANME	Hyaena_hyaena
ANME	Hystrix_cristata
ANME	Ictonyx_striatus
ANME	Lepus_victoriae
ANME	Lutra_maculicollis
ANME	Mellivora_capensis
ANME	Mungos_mungo
ANME	Orycteropus_afer
ANME	Papio_anubis
ANME	Procavia_capensis
ANME	Vulpes_pallida
APFR	Acinonyx_jubatus
APFR	Alcelaphus_buselaphus
APFR	Aonyx_capensis
APFR	Atelerix_albiventris
APFR	Atilax_paludinosus
APFR	Canis_adustus
APFR	Caracal_caracal
APFR	Cephalophus_rufilatus
APFR	Chlorocebus_aethiops
APFR	Civettictis_civetta
APFR	Crocuta_crocuta
APFR	Damaliscus_lunatus
APFR	Erythrocebus_patas
APFR	Felis_silvestris
APFR	Galago_senegalensis
APFR	Galerella_sanguinea
APFR	Gazella_rufifrons
APFR	Genetta_genetta
APFR	Genetta_thierryi
APFR	Herpestes_ichneumon
APFR	Hippotragus_equinus
APFR	Hystrix_cristata
APFR	Ichneumia_albicauda
APFR	Ictonyx_striatus
APFR	Kobus_ellipsiprymnus
APFR	Kobus_kob
APFR	Leptailurus_serval
APFR	Lepus_capensis
APFR	Lepus_victoriae
APFR	Loxodonta_africana
APFR	Lutra_maculicollis
APFR	Lycaon_pictus
APFR	Mellivora_capensis
APFR	Mungos_mungo
APFR	Orycteropus_afer
APFR	Ourebia_ourebi
APFR	Panthera_leo
APFR	Panthera_pardus
APFR	Papio_anubis
APFR	Phacochoerus_africanus
APFR	Procavia_capensis
APFR	Redunca_redunca
APFR	Sylvicapra_grimmia
APFR	Syncerus_caffer
APFR	Tragelaphus_scriptus
ARAW	Acinonyx_jubatus
ARAW	Canis_mesomelas
ARAW	Caracal_caracal
ARAW	Chlorocebus_aethiops
ARAW	Crocuta_crocuta
ARAW	Damaliscus_hunteri
ARAW	Damaliscus_lunatus
ARAW	Diceros_bicornis
ARAW	Equus_burchellii
ARAW	Equus_grevyi
ARAW	Gazella_granti
ARAW	Giraffa_camelopardalis
ARAW	Litocranius_walleri
ARAW	Loxodonta_africana
ARAW	Lycaon_pictus
ARAW	Madoqua_kirkii
ARAW	Mellivora_capensis
ARAW	Oryx_gazella
ARAW	Panthera_leo
ARAW	Papio_cynocephalus
ARAW	Phacochoerus_aethiopicus
ARAW	Sylvicapra_grimmia
ARAW	Syncerus_caffer
ARAW	Taurotragus_oryx
ARAW	Tragelaphus_imberbis
ARU	Aepyceros_melampus
ARU	Atilax_paludinosus
ARU	Canis_adustus
ARU	Canis_mesomelas
ARU	Cephalophus_monticola
ARU	Cercopithecus_mitis
ARU	Chlorocebus_aethiops
ARU	Civettictis_civetta
ARU	Colobus_polykomos
ARU	Cricetomys_gambianus
ARU	Crocuta_crocuta
ARU	Dendrohyrax_arboreus
ARU	Diceros_bicornis
ARU	Equus_burchellii
ARU	Galago_senegalensis
ARU	Galerella_sanguinea
ARU	Genetta_tigrina
ARU	Giraffa_camelopardalis
ARU	Heterohyrax_brucei
ARU	Hippopotamus_amphibius
ARU	Hylochoerus_meinertzhageni
ARU	Hystrix_cristata
ARU	Ictonyx_striatus
ARU	Kobus_ellipsiprymnus
ARU	Leptailurus_serval
ARU	Lepus_capensis
ARU	Loxodonta_africana
ARU	Madoqua_kirkii
ARU	Nandinia_binotata
ARU	Neotragus_moschatus
ARU	Orycteropus_afer
ARU	Otolemur_crassicaudatus
ARU	Panthera_pardus
ARU	Papio_anubis
ARU	Phacochoerus_africanus
ARU	Potamochoerus_larvatus
ARU	Redunca_redunca
ARU	Sylvicapra_grimmia
ARU	Syncerus_caffer
ARU	Tragelaphus_scriptus
ATFR	Acinonyx_jubatus
ATFR	Alcelaphus_buselaphus
ATFR	Aonyx_capensis
ATFR	Atelerix_albiventris
ATFR	Atilax_paludinosus
ATFR	Canis_adustus
ATFR	Caracal_caracal
ATFR	Cephalophus_rufilatus
ATFR	Chlorocebus_aethiops
ATFR	Civettictis_civetta
ATFR	Crocuta_crocuta
ATFR	Damaliscus_lunatus
ATFR	Erythrocebus_patas
ATFR	Felis_silvestris
ATFR	Galago_senegalensis
ATFR	Galerella_sanguinea
ATFR	Gazella_rufifrons
ATFR	Genetta_genetta
ATFR	Genetta_thierryi
ATFR	Herpestes_ichneumon
ATFR	Hippotragus_equinus
ATFR	Hystrix_cristata
ATFR	Ichneumia_albicauda
ATFR	Ictonyx_striatus
ATFR	Kobus_ellipsiprymnus
ATFR	Kobus_kob
ATFR	Leptailurus_serval
ATFR	Lepus_capensis
ATFR	Lepus_victoriae
ATFR	Loxodonta_africana
ATFR	Lutra_maculicollis
ATFR	Lycaon_pictus
ATFR	Mellivora_capensis
ATFR	Mungos_mungo
ATFR	Orycteropus_afer
ATFR	Ourebia_ourebi
ATFR	Panthera_leo
ATFR	Panthera_pardus
ATFR	Papio_anubis
ATFR	Phacochoerus_africanus
ATFR	Procavia_capensis
ATFR	Redunca_redunca
ATFR	Sylvicapra_grimmia
ATFR	Syncerus_caffer
ATFR	Tragelaphus_scriptus
ATNR	Acinonyx_jubatus
ATNR	Addax_nasomaculatus
ATNR	Canis_aureus
ATNR	Caracal_caracal
ATNR	Erythrocebus_patas
ATNR	Felis_margarita
ATNR	Felis_silvestris
ATNR	Gazella_dorcas
ATNR	Gazella_leptoceros
ATNR	Genetta_genetta
ATNR	Hyaena_hyaena
ATNR	Hystrix_cristata
ATNR	Ictonyx_libyca
ATNR	Ictonyx_striatus
ATNR	Lepus_capensis
ATNR	Lycaon_pictus
ATNR	Mellivora_capensis
ATNR	Panthera_pardus
ATNR	Phacochoerus_africanus
ATNR	Procavia_capensis
ATNR	Vulpes_pallida
ATNR	Vulpes_rueppellii
ATNR	Vulpes_zerda
AWA	Acinonyx_jubatus
AWA	Alcelaphus_buselaphus
AWA	Canis_aureus
AWA	Canis_mesomelas
AWA	Caracal_caracal
AWA	Chlorocebus_aethiops
AWA	Civettictis_civetta
AWA	Colobus_guereza
AWA	Crocuta_crocuta
AWA	Felis_silvestris
AWA	Galerella_sanguinea
AWA	Gazella_soemmerringii
AWA	Genetta_abyssinica
AWA	Genetta_maculata
AWA	Helogale_parvula
AWA	Herpestes_ichneumon
AWA	Hippopotamus_amphibius
AWA	Hyaena_hyaena
AWA	Ichneumia_albicauda
AWA	Ictonyx_striatus
AWA	Kobus_ellipsiprymnus
AWA	Leptailurus_serval
AWA	Lutra_maculicollis
AWA	Lycaon_pictus
AWA	Madoqua_saltiana
AWA	Mellivora_capensis
AWA	Oreotragus_oreotragus
AWA	Orycteropus_afer
AWA	Oryx_gazella
AWA	Otocyon_megalotis
AWA	Panthera_leo
AWA	Panthera_pardus
AWA	Papio_anubis
AWA	Papio_hamadryas
AWA	Phacochoerus_africanus
AWA	Potamochoerus_larvatus
AWA	Procavia_capensis
AWA	Proteles_cristatus
AWA	Redunca_redunca
AWA	Sylvicapra_grimmia
AWA	Tragelaphus_buxtoni
AWA	Tragelaphus_imberbis
AWA	Tragelaphus_scriptus
AWA	Tragelaphus_strepsiceros
BAD	Alcelaphus_buselaphus
BAD	Aonyx_capensis
BAD	Atilax_paludinosus
BAD	Canis_adustus
BAD	Caracal_caracal
BAD	Cephalophus_maxwellii
BAD	Cephalophus_rufilatus
BAD	Chlorocebus_aethiops
BAD	Civettictis_civetta
BAD	Colobus_polykomos
BAD	Crocuta_crocuta
BAD	Erythrocebus_patas
BAD	Felis_silvestris
BAD	Galago_senegalensis
BAD	Galerella_sanguinea
BAD	Genetta_genetta
BAD	Genetta_maculata
BAD	Genetta_thierryi
BAD	Herpestes_ichneumon
BAD	Hippotragus_equinus
BAD	Hystrix_cristata
BAD	Ichneumia_albicauda
BAD	Ictonyx_striatus
BAD	Kobus_ellipsiprymnus
BAD	Kobus_kob
BAD	Leptailurus_serval
BAD	Lepus_victoriae
BAD	Lycaon_pictus
BAD	Mellivora_capensis
BAD	Mungos_gambianus
BAD	Mungos_mungo
BAD	Nandinia_binotata
BAD	Orycteropus_afer
BAD	Ourebia_ourebi
BAD	Pan_troglodytes
BAD	Panthera_leo
BAD	Panthera_pardus
BAD	Papio_papio
BAD	Phacochoerus_africanus
BAD	Piliocolobus_badius
BAD	Potamochoerus_porcus
BAD	Procavia_capensis
BAD	Redunca_redunca
BAD	Sylvicapra_grimmia
BAD	Syncerus_caffer
BAD	Taurotragus_derbianus
BAD	Tragelaphus_scriptus
BAD	Tragelaphus_spekii
BAIE	Canis_adustus
BAIE	Caracal_caracal
BAIE	Gazella_cuvieri
BAIE	Gazella_dorcas
BAIE	Genetta_genetta
BAIE	Hyaena_hyaena
BAIE	Hystrix_cristata
BAIE	Ictonyx_libyca
BAIE	Lepus_capensis
BAIE	Mellivora_capensis
BALE	Atilax_paludinosus
BALE	Canis_aureus
BALE	Canis_simensis
BALE	Caracal_caracal
BALE	Chlorocebus_aethiops
BALE	Civettictis_civetta
BALE	Colobus_guereza
BALE	Crocuta_crocuta
BALE	Felis_silvestris
BALE	Genetta_maculata
BALE	Herpestes_ichneumon
BALE	Heterohyrax_brucei
BALE	Hylochoerus_meinertzhageni
BALE	Ichneumia_albicauda
BALE	Ictonyx_striatus
BALE	Leptailurus_serval
BALE	Lycaon_pictus
BALE	Mellivora_capensis
BALE	Oreotragus_oreotragus
BALE	Orycteropus_afer
BALE	Panthera_leo
BALE	Panthera_pardus
BALE	Papio_anubis
BALE	Phacochoerus_africanus
BALE	Potamochoerus_larvatus
BALE	Procavia_capensis
BALE	Redunca_redunca
BALE	Sylvicapra_grimmia
BALE	Tragelaphus_scriptus
BAN	Acinonyx_jubatus
BAN	Aepyceros_melampus
BAN	Aonyx_capensis
BAN	Atelerix_albiventris
BAN	Atilax_paludinosus
BAN	Canis_adustus
BAN	Caracal_caracal
BAN	Cephalophus_monticola
BAN	Cephalophus_silvicultor
BAN	Cercopithecus_mitis
BAN	Chlorocebus_aethiops
BAN	Civettictis_civetta
BAN	Crocuta_crocuta
BAN	Damaliscus_lunatus
BAN	Dendrohyrax_arboreus
BAN	Equus_burchellii
BAN	Felis_silvestris
BAN	Galago_moholi
BAN	Galerella_sanguinea
BAN	Genetta_angolensis
BAN	Genetta_tigrina
BAN	Helogale_parvula
BAN	Herpestes_ichneumon
BAN	Heterohyrax_brucei
BAN	Hippopotamus_amphibius
BAN	Hippotragus_equinus
BAN	Hippotragus_niger
BAN	Hystrix_africaeaustralis
BAN	Ichneumia_albicauda
BAN	Ictonyx_striatus
BAN	Kobus_ellipsiprymnus
BAN	Kobus_leche
BAN	Kobus_vardonii
BAN	Leptailurus_serval
BAN	Lepus_victoriae
BAN	Lutra_maculicollis
BAN	Manis_temminckii
BAN	Mellivora_capensis
BAN	Mungos_mungo
BAN	Oreotragus_oreotragus
BAN	Orycteropus_afer
BAN	Otolemur_crassicaudatus
BAN	Ourebia_ourebi
BAN	Panthera_leo
BAN	Panthera_pardus
BAN	Papio_cynocephalus
BAN	Pedetes_capensis
BAN	Phacochoerus_africanus
BAN	Poecilogale_albinucha
BAN	Potamochoerus_larvatus
BAN	Potamogale_velox
BAN	Procavia_capensis
BAN	Raphicerus_sharpei
BAN	Redunca_arundinum
BAN	Rhynchogale_melleri
BAN	Sigmoceros_lichtensteinii
BAN	Sylvicapra_grimmia
BAN	Syncerus_caffer
BAN	Taurotragus_oryx
BAN	Tragelaphus_scriptus
BAN	Tragelaphus_spekii
BANC	Addax_nasomaculatus
BANC	Canis_aureus
BANC	Caracal_caracal
BANC	Felis_silvestris
BANC	Gazella_dorcas
BANC	Hyaena_hyaena
BANC	Ictonyx_libyca
BANC	Mellivora_capensis
BANC	Procavia_capensis
BASA	Acinonyx_jubatus
BASA	Alcelaphus_buselaphus
BASA	Aonyx_capensis
BASA	Atelerix_albiventris
BASA	Atilax_paludinosus
BASA	Canis_aureus
BASA	Caracal_caracal
BASA	Chlorocebus_aethiops
BASA	Civettictis_civetta
BASA	Colobus_guereza
BASA	Crocuta_crocuta
BASA	Damaliscus_lunatus
BASA	Erythrocebus_patas
BASA	Felis_silvestris
BASA	Galago_moholi
BASA	Galerella_sanguinea
BASA	Gazella_rufifrons
BASA	Genetta_genetta
BASA	Genetta_tigrina
BASA	Giraffa_camelopardalis
BASA	Herpestes_ichneumon
BASA	Hippotragus_equinus
BASA	Hyaena_hyaena
BASA	Hystrix_cristata
BASA	Ichneumia_albicauda
BASA	Ictonyx_striatus
BASA	Kobus_ellipsiprymnus
BASA	Kobus_kob
BASA	Leptailurus_serval
BASA	Lepus_capensis
BASA	Lepus_victoriae
BASA	Lutra_maculicollis
BASA	Lycaon_pictus
BASA	Mellivora_capensis
BASA	Mungos_mungo
BASA	Orycteropus_afer
BASA	Ourebia_ourebi
BASA	Panthera_leo
BASA	Panthera_pardus
BASA	Papio_anubis
BASA	Phacochoerus_africanus
BASA	Poelagus_marjorita
BASA	Procavia_capensis
BASA	Redunca_redunca
BASA	Sylvicapra_grimmia
BASA	Syncerus_caffer
BASA	Tragelaphus_scriptus
BASA	Tragelaphus_strepsiceros
BAZ	Aepyceros_melampus
BAZ	Aonyx_capensis
BAZ	Atilax_paludinosus
BAZ	Canis_adustus
BAZ	Caracal_caracal
BAZ	Chlorocebus_aethiops
BAZ	Civettictis_civetta
BAZ	Felis_silvestris
BAZ	Galago_moholi
BAZ	Galago_zanzibaricus
BAZ	Galerella_sanguinea
BAZ	Genetta_tigrina
BAZ	Helogale_parvula
BAZ	Herpestes_ichneumon
BAZ	Hystrix_africaeaustralis
BAZ	Ichneumia_albicauda
BAZ	Ictonyx_striatus
BAZ	Leptailurus_serval
BAZ	Lepus_capensis
BAZ	Lepus_victoriae
BAZ	Lycaon_pictus
BAZ	Manis_temminckii
BAZ	Mellivora_capensis
BAZ	Mungos_mungo
BAZ	Neotragus_moschatus
BAZ	Orycteropus_afer
BAZ	Otolemur_crassicaudatus
BAZ	Panthera_pardus
BAZ	Papio_ursinus
BAZ	Pedetes_capensis
BAZ	Phacochoerus_africanus
BAZ	Procavia_capensis
BAZ	Raphicerus_campestris
BAZ	Raphicerus_sharpei
BAZ	Redunca_arundinum
BAZ	Sylvicapra_grimmia
BAZ	Tragelaphus_scriptus
BBN	Aonyx_congicus
BBN	Arctocebus_aureus
BBN	Atherurus_africanus
BBN	Atilax_paludinosus
BBN	Bdeogale_nigripes
BBN	Cephalophus_callipygus
BBN	Cephalophus_dorsalis
BBN	Cephalophus_leucogaster
BBN	Cephalophus_monticola
BBN	Cephalophus_nigrifrons
BBN	Cephalophus_silvicultor
BBN	Cercocebus_galeritus
BBN	Cercopithecus_cephus
BBN	Cercopithecus_neglectus
BBN	Cercopithecus_nictitans
BBN	Cercopithecus_pogonias
BBN	Civettictis_civetta
BBN	Colobus_guereza
BBN	Colobus_satanas
BBN	Dendrohyrax_dorsalis
BBN	Euoticus_elegantulus
BBN	Galagoides_demidoff
BBN	Galagoides_thomasi
BBN	Galerella_sanguinea
BBN	Genetta_servalina
BBN	Genetta_tigrina
BBN	Gorilla_gorilla
BBN	Herpestes_naso
BBN	Hyemoschus_aquaticus
BBN	Hylochoerus_meinertzhageni
BBN	Hystrix_cristata
BBN	Lophocebus_albigena
BBN	Loxodonta_africana
BBN	Lutra_maculicollis
BBN	Manis_gigantea
BBN	Manis_tetradactyla
BBN	Manis_tricuspis
BBN	Mellivora_capensis
BBN	Miopithecus_talapoin
BBN	Nandinia_binotata
BBN	Neotragus_batesi
BBN	Pan_troglodytes
BBN	Panthera_pardus
BBN	Perodicticus_potto
BBN	Piliocolobus_badius
BBN	Poiana_richardsonii
BBN	Potamochoerus_porcus
BBN	Potamogale_velox
BBN	Profelis_aurata
BBN	Syncerus_caffer
BBN	Tragelaphus_eurycerus
BBN	Tragelaphus_spekii
BELZ	Atelerix_algirus
BELZ	Canis_aureus
BELZ	Caracal_caracal
BELZ	Felis_silvestris
BELZ	Gazella_cuvieri
BELZ	Genetta_genetta
BELZ	Hyaena_hyaena
BELZ	Hystrix_cristata
BELZ	Sus_scrofa
BELZ	Vulpes_vulpes
BEN	Acinonyx_jubatus
BEN	Alcelaphus_buselaphus
BEN	Aonyx_capensis
BEN	Aonyx_congicus
BEN	Atilax_paludinosus
BEN	Canis_adustus
BEN	Canis_aureus
BEN	Caracal_caracal
BEN	Cephalophus_rufilatus
BEN	Chlorocebus_aethiops
BEN	Civettictis_civetta
BEN	Colobus_guereza
BEN	Crocuta_crocuta
BEN	Damaliscus_lunatus
BEN	Erythrocebus_patas
BEN	Felis_silvestris
BEN	Galago_senegalensis
BEN	Galerella_sanguinea
BEN	Genetta_genetta
BEN	Genetta_tigrina
BEN	Giraffa_camelopardalis
BEN	Herpestes_ichneumon
BEN	Hippotragus_equinus
BEN	Hystrix_cristata
BEN	Ichneumia_albicauda
BEN	Ictonyx_striatus
BEN	Kobus_ellipsiprymnus
BEN	Kobus_kob
BEN	Leptailurus_serval
BEN	Lepus_capensis
BEN	Lepus_victoriae
BEN	Loxodonta_africana
BEN	Lutra_maculicollis
BEN	Lycaon_pictus
BEN	Manis_tricuspis
BEN	Mellivora_capensis
BEN	Mungos_mungo
BEN	Orycteropus_afer
BEN	Ourebia_ourebi
BEN	Panthera_leo
BEN	Panthera_pardus
BEN	Papio_anubis
BEN	Phacochoerus_africanus
BEN	Potamochoerus_porcus
BEN	Procavia_capensis
BEN	Redunca_redunca
BEN	Sylvicapra_grimmia
BEN	Syncerus_caffer
BEN	Taurotragus_derbianus
BEN	Tragelaphus_scriptus
BF	Atherurus_africanus
BF	Canis_adustus
BF	Cephalophus_monticola
BF	Cephalophus_nigrifrons
BF	Cephalophus_weynsi
BF	Cercopithecus_ascanius
BF	Cercopithecus_mitis
BF	Chlorocebus_aethiops
BF	Civettictis_civetta
BF	Colobus_angolensis
BF	Crocuta_crocuta
BF	Dendrohyrax_arboreus
BF	Equus_burchellii
BF	Felis_silvestris
BF	Galago_moholi
BF	Galago_senegalensis
BF	Galerella_sanguinea
BF	Genetta_servalina
BF	Genetta_tigrina
BF	Herpestes_ichneumon
BF	Heterohyrax_brucei
BF	Hippopotamus_amphibius
BF	Hystrix_africaeaustralis
BF	Hystrix_cristata
BF	Ichneumia_albicauda
BF	Ictonyx_striatus
BF	Kobus_ellipsiprymnus
BF	Leptailurus_serval
BF	Lepus_capensis
BF	Lepus_victoriae
BF	Manis_tricuspis
BF	Mellivora_capensis
BF	Mungos_mungo
BF	Oreotragus_oreotragus
BF	Orycteropus_afer
BF	Otolemur_crassicaudatus
BF	Ourebia_ourebi
BF	Pan_troglodytes
BF	Panthera_leo
BF	Panthera_pardus
BF	Papio_anubis
BF	Perodicticus_potto
BF	Phacochoerus_africanus
BF	Piliocolobus_badius
BF	Poecilogale_albinucha
BF	Potamochoerus_larvatus
BF	Procavia_capensis
BF	Profelis_aurata
BF	Redunca_redunca
BF	Sylvicapra_grimmia
BF	Syncerus_caffer
BF	Tragelaphus_scriptus
BHINE	Acinonyx_jubatus
BHINE	Aepyceros_melampus
BHINE	Aonyx_capensis
BHINE	Atilax_paludinosus
BHINE	Canis_adustus
BHINE	Canis_mesomelas
BHINE	Caracal_caracal
BHINE	Chlorocebus_aethiops
BHINE	Civettictis_civetta
BHINE	Connochaetes_taurinus
BHINE	Crocuta_crocuta
BHINE	Equus_burchellii
BHINE	Felis_silvestris
BHINE	Galago_moholi
BHINE	Galago_zanzibaricus
BHINE	Galerella_sanguinea
BHINE	Genetta_genetta
BHINE	Genetta_tigrina
BHINE	Giraffa_camelopardalis
BHINE	Helogale_parvula
BHINE	Herpestes_ichneumon
BHINE	Hippopotamus_amphibius
BHINE	Hystrix_africaeaustralis
BHINE	Ichneumia_albicauda
BHINE	Ictonyx_striatus
BHINE	Leptailurus_serval
BHINE	Lepus_capensis
BHINE	Lepus_victoriae
BHINE	Loxodonta_africana
BHINE	Lutra_maculicollis
BHINE	Lycaon_pictus
BHINE	Manis_temminckii
BHINE	Mellivora_capensis
BHINE	Mungos_mungo
BHINE	Neotragus_moschatus
BHINE	Orycteropus_afer
BHINE	Otocyon_megalotis
BHINE	Otolemur_crassicaudatus
BHINE	Ourebia_ourebi
BHINE	Panthera_leo
BHINE	Panthera_pardus
BHINE	Papio_ursinus
BHINE	Parahyaena_brunnea
BHINE	Pedetes_capensis
BHINE	Phacochoerus_africanus
BHINE	Potamochoerus_larvatus
BHINE	Procavia_capensis
BHINE	Proteles_cristatus
BHINE	Raphicerus_campestris
BHINE	Raphicerus_sharpei
BHINE	Redunca_arundinum
BHINE	Sylvicapra_grimmia
BHINE	Syncerus_caffer
BHINE	Taurotragus_oryx
BHINE	Tragelaphus_angasii
BHINE	Tragelaphus_scriptus
BHINE	Tragelaphus_strepsiceros
BIK	Acinonyx_jubatus
BIK	Aepyceros_melampus
BIK	Aonyx_capensis
BIK	Atelerix_frontalis
BIK	Atilax_paludinosus
BIK	Canis_adustus
BIK	Canis_mesomelas
BIK	Caracal_caracal
BIK	Chlorocebus_aethiops
BIK	Civettictis_civetta
BIK	Connochaetes_taurinus
BIK	Crocuta_crocuta
BIK	Equus_burchellii
BIK	Felis_silvestris
BIK	Galago_moholi
BIK	Galerella_flavescens
BIK	Galerella_sanguinea
BIK	Genetta_genetta
BIK	Genetta_tigrina
BIK	Helogale_parvula
BIK	Herpestes_ichneumon
BIK	Heterohyrax_brucei
BIK	Hippopotamus_amphibius
BIK	Hystrix_africaeaustralis
BIK	Ichneumia_albicauda
BIK	Ictonyx_striatus
BIK	Kobus_ellipsiprymnus
BIK	Leptailurus_serval
BIK	Lepus_capensis
BIK	Lepus_victoriae
BIK	Lycaon_pictus
BIK	Madoqua_kirkii
BIK	Manis_temminckii
BIK	Mellivora_capensis
BIK	Mungos_mungo
BIK	Oreotragus_oreotragus
BIK	Orycteropus_afer
BIK	Otocyon_megalotis
BIK	Otolemur_crassicaudatus
BIK	Ourebia_ourebi
BIK	Panthera_leo
BIK	Panthera_pardus
BIK	Papio_ursinus
BIK	Paracynictis_selousi
BIK	Pedetes_capensis
BIK	Phacochoerus_africanus
BIK	Poecilogale_albinucha
BIK	Potamochoerus_larvatus
BIK	Procavia_capensis
BIK	Proteles_cristatus
BIK	Raphicerus_campestris
BIK	Redunca_arundinum
BIK	Sylvicapra_grimmia
BIK	Syncerus_caffer
BIK	Taurotragus_oryx
BIK	Tragelaphus_scriptus
BIK	Tragelaphus_strepsiceros
BIN	Acinonyx_jubatus
BIN	Alcelaphus_buselaphus
BIN	Aonyx_capensis
BIN	Atelerix_albiventris
BIN	Atilax_paludinosus
BIN	Canis_adustus
BIN	Canis_aureus
BIN	Caracal_caracal
BIN	Chlorocebus_aethiops
BIN	Civettictis_civetta
BIN	Colobus_guereza
BIN	Crocuta_crocuta
BIN	Damaliscus_lunatus
BIN	Erythrocebus_patas
BIN	Felis_silvestris
BIN	Galago_senegalensis
BIN	Galerella_sanguinea
BIN	Genetta_genetta
BIN	Genetta_tigrina
BIN	Herpestes_ichneumon
BIN	Hippotragus_equinus
BIN	Hystrix_cristata
BIN	Ichneumia_albicauda
BIN	Ictonyx_striatus
BIN	Kobus_ellipsiprymnus
BIN	Kobus_kob
BIN	Leptailurus_serval
BIN	Lepus_capensis
BIN	Lepus_victoriae
BIN	Lutra_maculicollis
BIN	Lycaon_pictus
BIN	Mellivora_capensis
BIN	Mungos_mungo
BIN	Orycteropus_afer
BIN	Ourebia_ourebi
BIN	Panthera_leo
BIN	Panthera_pardus
BIN	Papio_anubis
BIN	Phacochoerus_africanus
BIN	Potamochoerus_porcus
BIN	Procavia_capensis
BIN	Redunca_redunca
BIN	Sylvicapra_grimmia
BIN	Syncerus_caffer
BIN	Tragelaphus_scriptus
BON	Alcelaphus_buselaphus
BON	Aonyx_capensis
BON	Atelerix_albiventris
BON	Atilax_paludinosus
BON	Canis_adustus
BON	Caracal_caracal
BON	Cephalophus_rufilatus
BON	Chlorocebus_aethiops
BON	Civettictis_civetta
BON	Crocuta_crocuta
BON	Erythrocebus_patas
BON	Felis_silvestris
BON	Galago_senegalensis
BON	Galerella_sanguinea
BON	Genetta_genetta
BON	Genetta_maculata
BON	Genetta_thierryi
BON	Herpestes_ichneumon
BON	Hippotragus_equinus
BON	Hystrix_cristata
BON	Ichneumia_albicauda
BON	Ictonyx_striatus
BON	Kobus_ellipsiprymnus
BON	Kobus_kob
BON	Leptailurus_serval
BON	Lepus_capensis
BON	Lepus_victoriae
BON	Loxodonta_africana
BON	Lutra_maculicollis
BON	Lycaon_pictus
BON	Mellivora_capensis
BON	Mungos_mungo
BON	Orycteropus_afer
BON	Ourebia_ourebi
BON	Panthera_leo
BON	Panthera_pardus
BON	Papio_anubis
BON	Phacochoerus_africanus
BON	Procavia_capensis
BON	Redunca_redunca
BON	Sylvicapra_grimmia
BON	Tragelaphus_scriptus
BOUH	Ammotragus_lervia
BOUH	Atelerix_algirus
BOUH	Canis_aureus
BOUH	Caracal_caracal
BOUH	Felis_silvestris
BOUH	Gazella_cuvieri
BOUH	Gazella_dorcas
BOUH	Genetta_genetta
BOUH	Hyaena_hyaena
BOUH	Hystrix_cristata
BOUH	Ictonyx_libyca
BOUH	Lepus_capensis
BOUH	Sus_scrofa
BOUH	Vulpes_rueppellii
BOUH	Vulpes_vulpes
BUD	Cephalophus_nigrifrons
BUD	Civettictis_civetta
BUD	Colobus_guereza
BUD	Dendrohyrax_dorsalis
BUD	Hippopotamus_amphibius
BUD	Loxodonta_africana
BUD	Panthera_leo
BUD	Panthera_pardus
BUD	Perodicticus_potto
BUD	Phacochoerus_aethiopicus
BUD	Potamochoerus_larvatus
BUD	Syncerus_caffer
BUD	Tragelaphus_scriptus
BUF	Antidorcas_marsupialis
BUF	Aonyx_capensis
BUF	Atelerix_frontalis
BUF	Atilax_paludinosus
BUF	Canis_adustus
BUF	Canis_mesomelas
BUF	Caracal_caracal
BUF	Cephalophus_monticola
BUF	Chlorocebus_aethiops
BUF	Civettictis_civetta
BUF	Crocuta_crocuta
BUF	Felis_silvestris
BUF	Galago_moholi
BUF	Galerella_sanguinea
BUF	Genetta_genetta
BUF	Helogale_parvula
BUF	Herpestes_ichneumon
BUF	Heterohyrax_brucei
BUF	Hystrix_cristata
BUF	Ichneumia_albicauda
BUF	Ictonyx_striatus
BUF	Leptailurus_serval
BUF	Lepus_capensis
BUF	Lepus_victoriae
BUF	Lycaon_pictus
BUF	Manis_temminckii
BUF	Mellivora_capensis
BUF	Mungos_mungo
BUF	Oreotragus_oreotragus
BUF	Otolemur_crassicaudatus
BUF	Ourebia_ourebi
BUF	Panthera_leo
BUF	Panthera_pardus
BUF	Papio_cynocephalus
BUF	Paracynictis_selousi
BUF	Pedetes_capensis
BUF	Phacochoerus_africanus
BUF	Poecilogale_albinucha
BUF	Potamochoerus_larvatus
BUF	Procavia_capensis
BUF	Raphicerus_campestris
BUF	Sylvicapra_grimmia
BUF	Syncerus_caffer
BUF	Taurotragus_oryx
BUF	Tragelaphus_scriptus
BUF	Tragelaphus_strepsiceros
CHAM	Ammotragus_lervia
CHAM	Atelerix_algirus
CHAM	Canis_aureus
CHAM	Caracal_caracal
CHAM	Felis_silvestris
CHAM	Gazella_cuvieri
CHAM	Gazella_dorcas
CHAM	Genetta_genetta
CHAM	Herpestes_ichneumon
CHAM	Hyaena_hyaena
CHAM	Hystrix_cristata
CHAM	Ictonyx_libyca
CHAM	Lepus_capensis
CHAM	Lutra_lutra
CHAM	Sus_scrofa
CHAM	Vulpes_rueppellii
CHAM	Vulpes_vulpes
CHO	Acinonyx_jubatus
CHO	Aepyceros_melampus
CHO	Aonyx_capensis
CHO	Canis_adustus
CHO	Canis_mesomelas
CHO	Caracal_caracal
CHO	Ceratotherium_simum
CHO	Chlorocebus_aethiops
CHO	Civettictis_civetta
CHO	Connochaetes_taurinus
CHO	Crocuta_crocuta
CHO	Cynictis_penicillata
CHO	Damaliscus_lunatus
CHO	Diceros_bicornis
CHO	Equus_burchellii
CHO	Felis_silvestris
CHO	Galago_moholi
CHO	Galerella_sanguinea
CHO	Genetta_tigrina
CHO	Giraffa_camelopardalis
CHO	Hippopotamus_amphibius
CHO	Hippotragus_equinus
CHO	Hippotragus_niger
CHO	Hystrix_africaeaustralis
CHO	Ictonyx_striatus
CHO	Kobus_ellipsiprymnus
CHO	Kobus_leche
CHO	Kobus_vardonii
CHO	Leptailurus_serval
CHO	Lepus_saxatilis
CHO	Loxodonta_africana
CHO	Lutra_maculicollis
CHO	Lycaon_pictus
CHO	Manis_temminckii
CHO	Mellivora_capensis
CHO	Mungos_mungo
CHO	Orycteropus_afer
CHO	Oryx_gazella
CHO	Otocyon_megalotis
CHO	Ourebia_ourebi
CHO	Panthera_leo
CHO	Panthera_pardus
CHO	Papio_ursinus
CHO	Pedetes_capensis
CHO	Phacochoerus_africanus
CHO	Potamochoerus_larvatus
CHO	Proteles_cristatus
CHO	Raphicerus_campestris
CHO	Redunca_arundinum
CHO	Sylvicapra_grimmia
CHO	Syncerus_caffer
CHO	Taurotragus_oryx
CHO	Thryonomys_swinderianus
CHO	Tragelaphus_scriptus
CHO	Tragelaphus_spekii
CHO	Tragelaphus_strepsiceros
CLB	Aonyx_capensis
CLB	Atelerix_albiventris
CLB	Atilax_paludinosus
CLB	Canis_adustus
CLB	Caracal_caracal
CLB	Chlorocebus_aethiops
CLB	Civettictis_civetta
CLB	Crocuta_crocuta
CLB	Erythrocebus_patas
CLB	Felis_silvestris
CLB	Galago_senegalensis
CLB	Gazella_rufifrons
CLB	Genetta_genetta
CLB	Herpestes_ichneumon
CLB	Hippotragus_equinus
CLB	Hyaena_hyaena
CLB	Hystrix_cristata
CLB	Ichneumia_albicauda
CLB	Ictonyx_striatus
CLB	Kobus_ellipsiprymnus
CLB	Leptailurus_serval
CLB	Lepus_capensis
CLB	Lepus_victoriae
CLB	Mellivora_capensis
CLB	Mungos_mungo
CLB	Orycteropus_afer
CLB	Papio_anubis
CLB	Procavia_capensis
CLB	Sylvicapra_grimmia
CLB	Vulpes_pallida
CMA	Aonyx_congicus
CMA	Arctocebus_aureus
CMA	Atherurus_africanus
CMA	Atilax_paludinosus
CMA	Bdeogale_nigripes
CMA	Cephalophus_callipygus
CMA	Cephalophus_dorsalis
CMA	Cephalophus_leucogaster
CMA	Cephalophus_monticola
CMA	Cephalophus_nigrifrons
CMA	Cephalophus_silvicultor
CMA	Cercocebus_torquatus
CMA	Cercopithecus_cephus
CMA	Cercopithecus_neglectus
CMA	Cercopithecus_nictitans
CMA	Cercopithecus_pogonias
CMA	Civettictis_civetta
CMA	Colobus_satanas
CMA	Crossarchus_obscurus
CMA	Dendrohyrax_dorsalis
CMA	Euoticus_elegantulus
CMA	Galago_alleni
CMA	Galagoides_demidoff
CMA	Galagoides_thomasi
CMA	Genetta_servalina
CMA	Genetta_tigrina
CMA	Gorilla_gorilla
CMA	Herpestes_naso
CMA	Hippopotamus_amphibius
CMA	Hyemoschus_aquaticus
CMA	Hylochoerus_meinertzhageni
CMA	Hystrix_cristata
CMA	Lophocebus_albigena
CMA	Loxodonta_africana
CMA	Lutra_maculicollis
CMA	Mandrillus_sphinx
CMA	Manis_gigantea
CMA	Manis_tetradactyla
CMA	Manis_tricuspis
CMA	Mellivora_capensis
CMA	Miopithecus_talapoin
CMA	Nandinia_binotata
CMA	Neotragus_batesi
CMA	Pan_troglodytes
CMA	Panthera_pardus
CMA	Perodicticus_potto
CMA	Poiana_richardsonii
CMA	Potamochoerus_porcus
CMA	Potamogale_velox
CMA	Profelis_aurata
CMA	Syncerus_caffer
CMA	Tragelaphus_scriptus
CMA	Tragelaphus_spekii
COM	Alcelaphus_buselaphus
COM	Aonyx_capensis
COM	Atelerix_albiventris
COM	Atherurus_africanus
COM	Atilax_paludinosus
COM	Canis_adustus
COM	Cephalophus_dorsalis
COM	Cephalophus_niger
COM	Cephalophus_rufilatus
COM	Cephalophus_silvicultor
COM	Cercocebus_torquatus
COM	Cercopithecus_campbelli
COM	Cercopithecus_diana
COM	Cercopithecus_nictitans
COM	Cercopithecus_petaurista
COM	Chlorocebus_aethiops
COM	Civettictis_civetta
COM	Colobus_vellerosus
COM	Cricetomys_gambianus
COM	Crocuta_crocuta
COM	Crossarchus_obscurus
COM	Dendrohyrax_dorsalis
COM	Erythrocebus_patas
COM	Felis_silvestris
COM	Galago_senegalensis
COM	Galagoides_demidoff
COM	Galerella_sanguinea
COM	Genetta_maculata
COM	Herpestes_ichneumon
COM	Hippopotamus_amphibius
COM	Hippotragus_equinus
COM	Hyemoschus_aquaticus
COM	Hylochoerus_meinertzhageni
COM	Hystrix_cristata
COM	Ichneumia_albicauda
COM	Kobus_ellipsiprymnus
COM	Kobus_kob
COM	Leptailurus_serval
COM	Lepus_saxatilis
COM	Loxodonta_africana
COM	Lutra_maculicollis
COM	Manis_gigantea
COM	Manis_tricuspis
COM	Mellivora_capensis
COM	Mungos_gambianus
COM	Nandinia_binotata
COM	Neotragus_pygmaeus
COM	Orycteropus_afer
COM	Ourebia_ourebi
COM	Pan_troglodytes
COM	Panthera_leo
COM	Panthera_pardus
COM	Papio_anubis
COM	Perodicticus_potto
COM	Phacochoerus_africanus
COM	Potamochoerus_porcus
COM	Procavia_capensis
COM	Procolobus_verus
COM	Profelis_aurata
COM	Protoxerus_stangeri
COM	Redunca_redunca
COM	Sylvicapra_grimmia
COM	Syncerus_caffer
COM	Thryonomys_swinderianus
COM	Tragelaphus_eurycerus
COM	Tragelaphus_scriptus
CON	Aonyx_congicus
CON	Arctocebus_aureus
CON	Atherurus_africanus
CON	Atilax_paludinosus
CON	Bdeogale_nigripes
CON	Canis_adustus
CON	Cephalophus_callipygus
CON	Cephalophus_dorsalis
CON	Cephalophus_leucogaster
CON	Cephalophus_monticola
CON	Cephalophus_nigrifrons
CON	Cephalophus_silvicultor
CON	Cercopithecus_cephus
CON	Cercopithecus_nictitans
CON	Cercopithecus_pogonias
CON	Chlorocebus_aethiops
CON	Civettictis_civetta
CON	Crocuta_crocuta
CON	Dendrohyrax_dorsalis
CON	Euoticus_elegantulus
CON	Felis_silvestris
CON	Galago_alleni
CON	Galagoides_demidoff
CON	Galagoides_thomasi
CON	Genetta_servalina
CON	Genetta_tigrina
CON	Gorilla_gorilla
CON	Herpestes_ichneumon
CON	Herpestes_naso
CON	Hyemoschus_aquaticus
CON	Hystrix_africaeaustralis
CON	Kobus_ellipsiprymnus
CON	Leptailurus_serval
CON	Loxodonta_africana
CON	Lutra_maculicollis
CON	Mandrillus_sphinx
CON	Manis_gigantea
CON	Manis_tetradactyla
CON	Manis_tricuspis
CON	Mellivora_capensis
CON	Nandinia_binotata
CON	Pan_troglodytes
CON	Panthera_pardus
CON	Perodicticus_potto
CON	Poecilogale_albinucha
CON	Poiana_richardsonii
CON	Potamochoerus_porcus
CON	Potamogale_velox
CON	Procavia_capensis
CON	Profelis_aurata
CON	Redunca_arundinum
CON	Syncerus_caffer
CON	Tragelaphus_scriptus
CON	Tragelaphus_spekii
CONG	Allenopithecus_nigroviridis
CONG	Aonyx_congicus
CONG	Atherurus_africanus
CONG	Atilax_paludinosus
CONG	Cephalophus_callipygus
CONG	Cephalophus_dorsalis
CONG	Cephalophus_leucogaster
CONG	Cephalophus_monticola
CONG	Cephalophus_nigrifrons
CONG	Cephalophus_silvicultor
CONG	Cercocebus_galeritus
CONG	Cercopithecus_ascanius
CONG	Cercopithecus_mona
CONG	Cercopithecus_neglectus
CONG	Cercopithecus_nictitans
CONG	Chlorocebus_aethiops
CONG	Civettictis_civetta
CONG	Colobus_polykomos
CONG	Cricetomys_emini
CONG	Crossarchus_obscurus
CONG	Dendrohyrax_dorsalis
CONG	Galagoides_demidoff
CONG	Galerella_sanguinea
CONG	Genetta_servalina
CONG	Genetta_tigrina
CONG	Genetta_victoriae
CONG	Gorilla_gorilla
CONG	Herpestes_naso
CONG	Hippopotamus_amphibius
CONG	Hyemoschus_aquaticus
CONG	Ichneumia_albicauda
CONG	Leptailurus_serval
CONG	Lophocebus_albigena
CONG	Lophocebus_aterrimus
CONG	Loxodonta_africana
CONG	Lutra_maculicollis
CONG	Manis_tetradactyla
CONG	Manis_tricuspis
CONG	Mellivora_capensis
CONG	Nandinia_binotata
CONG	Orycteropus_afer
CONG	Pan_paniscus
CONG	Pan_troglodytes
CONG	Panthera_pardus
CONG	Perodicticus_potto
CONG	Piliocolobus_badius
CONG	Potamochoerus_porcus
CONG	Potamogale_velox
CONG	Profelis_aurata
CONG	Syncerus_caffer
CONG	Tragelaphus_eurycerus
CONG	Tragelaphus_scriptus
CONG	Tragelaphus_spekii
CROS	Aonyx_capensis
CROS	Arctocebus_calabarensis
CROS	Atherurus_africanus
CROS	Atilax_paludinosus
CROS	Bdeogale_nigripes
CROS	Cephalophus_dorsalis
CROS	Cephalophus_monticola
CROS	Cephalophus_ogilbyi
CROS	Cephalophus_silvicultor
CROS	Cercocebus_torquatus
CROS	Cercopithecus_erythrotis
CROS	Cercopithecus_mona
CROS	Cercopithecus_nictitans
CROS	Civettictis_civetta
CROS	Cricetomys_emini
CROS	Cricetomys_gambianus
CROS	Crossarchus_obscurus
CROS	Dendrohyrax_dorsalis
CROS	Euoticus_elegantulus
CROS	Galago_alleni
CROS	Galagoides_demidoff
CROS	Genetta_maculata
CROS	Gorilla_gorilla
CROS	Herpestes_naso
CROS	Hippopotamus_amphibius
CROS	Hyemoschus_aquaticus
CROS	Lophocebus_albigena
CROS	Loxodonta_africana
CROS	Mandrillus_leucophaeus
CROS	Manis_tricuspis
CROS	Nandinia_binotata
CROS	Pan_troglodytes
CROS	Panthera_pardus
CROS	Perodicticus_potto
CROS	Potamochoerus_porcus
CROS	Potamogale_velox
CROS	Syncerus_caffer
CROS	Thryonomys_swinderianus
CROS	Tragelaphus_scriptus
CROS	Tragelaphus_spekii
DEUX	Alcelaphus_buselaphus
DEUX	Aonyx_capensis
DEUX	Atelerix_albiventris
DEUX	Atilax_paludinosus
DEUX	Canis_adustus
DEUX	Caracal_caracal
DEUX	Cephalophus_rufilatus
DEUX	Chlorocebus_aethiops
DEUX	Civettictis_civetta
DEUX	Crocuta_crocuta
DEUX	Erythrocebus_patas
DEUX	Felis_silvestris
DEUX	Galago_senegalensis
DEUX	Galerella_sanguinea
DEUX	Gazella_rufifrons
DEUX	Genetta_genetta
DEUX	Genetta_maculata
DEUX	Genetta_thierryi
DEUX	Herpestes_ichneumon
DEUX	Hippotragus_equinus
DEUX	Hystrix_cristata
DEUX	Ichneumia_albicauda
DEUX	Ictonyx_striatus
DEUX	Kobus_ellipsiprymnus
DEUX	Kobus_kob
DEUX	Leptailurus_serval
DEUX	Lepus_capensis
DEUX	Lepus_victoriae
DEUX	Loxodonta_africana
DEUX	Lutra_maculicollis
DEUX	Lycaon_pictus
DEUX	Mellivora_capensis
DEUX	Mungos_mungo
DEUX	Orycteropus_afer
DEUX	Ourebia_ourebi
DEUX	Panthera_leo
DEUX	Panthera_pardus
DEUX	Papio_anubis
DEUX	Phacochoerus_africanus
DEUX	Procavia_capensis
DEUX	Redunca_redunca
DEUX	Sylvicapra_grimmia
DEUX	Tragelaphus_scriptus
DIAW	Aonyx_capensis
DIAW	Atelerix_albiventris
DIAW	Canis_adustus
DIAW	Caracal_caracal
DIAW	Chlorocebus_aethiops
DIAW	Crossarchus_alexandri
DIAW	Erythrocebus_patas
DIAW	Felis_silvestris
DIAW	Galago_senegalensis
DIAW	Gazella_rufifrons
DIAW	Genetta_genetta
DIAW	Genetta_thierryi
DIAW	Herpestes_ichneumon
DIAW	Hyaena_hyaena
DIAW	Hystrix_cristata
DIAW	Ichneumia_albicauda
DIAW	Ictonyx_libyca
DIAW	Ictonyx_striatus
DIAW	Lepus_capensis
DIAW	Lepus_victoriae
DIAW	Mellivora_capensis
DIAW	Mungos_mungo
DIAW	Orycteropus_afer
DIAW	Panthera_pardus
DIAW	Phacochoerus_africanus
DIAW	Procavia_capensis
DIAW	Sylvicapra_grimmia
DIAW	Vulpes_pallida
DJU	Atelerix_algirus
DJU	Canis_aureus
DJU	Caracal_caracal
DJU	Felis_silvestris
DJU	Gazella_cuvieri
DJU	Gazella_dorcas
DJU	Genetta_genetta
DJU	Herpestes_ichneumon
DJU	Hyaena_hyaena
DJU	Hystrix_cristata
DJU	Leptailurus_serval
DJU	Lepus_capensis
DJU	Lutra_lutra
DJU	Macaca_sylvanus
DJU	Sus_scrofa
DJU	Vulpes_vulpes
DVGP	Acinonyx_jubatus
DVGP	Alcelaphus_buselaphus
DVGP	Antidorcas_marsupialis
DVGP	Atelerix_frontalis
DVGP	Canis_mesomelas
DVGP	Caracal_caracal
DVGP	Cynictis_penicillata
DVGP	Felis_nigripes
DVGP	Galerella_sanguinea
DVGP	Genetta_genetta
DVGP	Hystrix_africaeaustralis
DVGP	Ictonyx_striatus
DVGP	Lepus_capensis
DVGP	Lycaon_pictus
DVGP	Madoqua_kirkii
DVGP	Manis_temminckii
DVGP	Mellivora_capensis
DVGP	Mungos_mungo
DVGP	Oreotragus_oreotragus
DVGP	Oryx_gazella
DVGP	Panthera_pardus
DVGP	Papio_ursinus
DVGP	Parahyaena_brunnea
DVGP	Pedetes_capensis
DVGP	Phacochoerus_africanus
DVGP	Procavia_capensis
DVGP	Pronolagus_randensis
DVGP	Proteles_cristatus
DVGP	Raphicerus_campestris
DVGP	Suricata_suricatta
DVGP	Sylvicapra_grimmia
DVGP	Tragelaphus_strepsiceros
DVGP	Vulpes_chama
ELB	Canis_aureus
ELB	Capra_nubiana
ELB	Caracal_caracal
ELB	Felis_margarita
ELB	Felis_silvestris
ELB	Gazella_dorcas
ELB	Genetta_genetta
ELB	Heterohyrax_brucei
ELB	Hystrix_cristata
ELB	Ichneumia_albicauda
ELB	Ictonyx_libyca
ELB	Ictonyx_striatus
ELB	Lepus_capensis
ELB	Orycteropus_afer
ELB	Panthera_pardus
ELB	Procavia_capensis
ELB	Proteles_cristatus
ELB	Vulpes_cana
ELB	Vulpes_rueppellii
ELB	Vulpes_zerda
ENIG	Atelerix_albiventris
ENIG	Atherurus_africanus
ENIG	Atilax_paludinosus
ENIG	Cephalophus_maxwellii
ENIG	Cephalophus_monticola
ENIG	Cephalophus_niger
ENIG	Cephalophus_silvicultor
ENIG	Cercocebus_torquatus
ENIG	Cercopithecus_erythrogaster
ENIG	Cercopithecus_mona
ENIG	Cercopithecus_nictitans
ENIG	Civettictis_civetta
ENIG	Cricetomys_emini
ENIG	Cricetomys_gambianus
ENIG	Crossarchus_obscurus
ENIG	Dendrohyrax_dorsalis
ENIG	Galagoides_demidoff
ENIG	Genetta_maculata
ENIG	Hexaprotodon_liberiensis
ENIG	Hippopotamus_amphibius
ENIG	Hyemoschus_aquaticus
ENIG	Leptailurus_serval
ENIG	Lepus_victoriae
ENIG	Loxodonta_africana
ENIG	Manis_tetradactyla
ENIG	Manis_tricuspis
ENIG	Nandinia_binotata
ENIG	Pan_troglodytes
ENIG	Perodicticus_potto
ENIG	Potamochoerus_porcus
ENIG	Syncerus_caffer
ENIG	Thryonomys_swinderianus
ENIG	Tragelaphus_scriptus
ENIG	Tragelaphus_spekii
ETO	Acinonyx_jubatus
ETO	Aepyceros_melampus
ETO	Alcelaphus_buselaphus
ETO	Antidorcas_marsupialis
ETO	Atelerix_frontalis
ETO	Canis_mesomelas
ETO	Caracal_caracal
ETO	Connochaetes_taurinus
ETO	Crocuta_crocuta
ETO	Cynictis_penicillata
ETO	Equus_burchellii
ETO	Equus_zebra
ETO	Felis_nigripes
ETO	Felis_silvestris
ETO	Galago_moholi
ETO	Galerella_flavescens
ETO	Galerella_sanguinea
ETO	Genetta_genetta
ETO	Giraffa_camelopardalis
ETO	Helogale_parvula
ETO	Hippotragus_equinus
ETO	Hystrix_africaeaustralis
ETO	Ictonyx_striatus
ETO	Lepus_capensis
ETO	Lepus_victoriae
ETO	Loxodonta_africana
ETO	Lycaon_pictus
ETO	Madoqua_kirkii
ETO	Manis_temminckii
ETO	Mellivora_capensis
ETO	Mungos_mungo
ETO	Oreotragus_oreotragus
ETO	Orycteropus_afer
ETO	Oryx_gazella
ETO	Otocyon_megalotis
ETO	Panthera_leo
ETO	Panthera_pardus
ETO	Papio_ursinus
ETO	Pedetes_capensis
ETO	Phacochoerus_africanus
ETO	Procavia_capensis
ETO	Pronolagus_randensis
ETO	Suricata_suricatta
ETO	Sylvicapra_grimmia
ETO	Taurotragus_oryx
ETO	Tragelaphus_strepsiceros
ETO	Vulpes_chama
FADA	Acinonyx_jubatus
FADA	Addax_nasomaculatus
FADA	Canis_aureus
FADA	Caracal_caracal
FADA	Felis_margarita
FADA	Gazella_dama
FADA	Gazella_dorcas
FADA	Gazella_leptoceros
FADA	Genetta_genetta
FADA	Hyaena_hyaena
FADA	Hystrix_cristata
FADA	Ictonyx_libyca
FADA	Ictonyx_striatus
FADA	Lepus_capensis
FADA	Lepus_victoriae
FADA	Manis_temminckii
FADA	Mellivora_capensis
FADA	Papio_anubis
FADA	Procavia_capensis
FADA	Vulpes_pallida
FADA	Vulpes_zerda
GAD	Atelerix_albiventris
GAD	Canis_aureus
GAD	Caracal_caracal
GAD	Erythrocebus_patas
GAD	Felis_margarita
GAD	Felis_silvestris
GAD	Galago_senegalensis
GAD	Gazella_dorcas
GAD	Gazella_rufifrons
GAD	Genetta_genetta
GAD	Giraffa_camelopardalis
GAD	Hyaena_hyaena
GAD	Hystrix_cristata
GAD	Ictonyx_libyca
GAD	Ictonyx_striatus
GAD	Lepus_capensis
GAD	Lepus_victoriae
GAD	Mellivora_capensis
GAD	Mungos_mungo
GAD	Orycteropus_afer
GAD	Panthera_pardus
GAD	Papio_anubis
GAD	Procavia_capensis
GAD	Vulpes_pallida
GAM	Alcelaphus_buselaphus
GAM	Atilax_paludinosus
GAM	Canis_adustus
GAM	Canis_aureus
GAM	Caracal_caracal
GAM	Cercopithecus_mitis
GAM	Chlorocebus_aethiops
GAM	Civettictis_civetta
GAM	Colobus_guereza
GAM	Crocuta_crocuta
GAM	Damaliscus_lunatus
GAM	Erythrocebus_patas
GAM	Felis_silvestris
GAM	Galerella_sanguinea
GAM	Genetta_genetta
GAM	Genetta_maculata
GAM	Giraffa_camelopardalis
GAM	Herpestes_ichneumon
GAM	Heterohyrax_brucei
GAM	Hippopotamus_amphibius
GAM	Hippotragus_equinus
GAM	Hylochoerus_meinertzhageni
GAM	Ichneumia_albicauda
GAM	Ictonyx_striatus
GAM	Kobus_ellipsiprymnus
GAM	Kobus_kob
GAM	Kobus_megaceros
GAM	Leptailurus_serval
GAM	Loxodonta_africana
GAM	Lutra_maculicollis
GAM	Lycaon_pictus
GAM	Mellivora_capensis
GAM	Mungos_mungo
GAM	Orycteropus_afer
GAM	Ourebia_ourebi
GAM	Panthera_leo
GAM	Panthera_pardus
GAM	Papio_anubis
GAM	Phacochoerus_africanus
GAM	Potamochoerus_larvatus
GAM	Redunca_redunca
GAM	Sylvicapra_grimmia
GAM	Syncerus_caffer
GAM	Tragelaphus_scriptus
GAR	Alcelaphus_buselaphus
GAR	Ammotragus_lervia
GAR	Aonyx_capensis
GAR	Aonyx_congicus
GAR	Atelerix_albiventris
GAR	Atherurus_africanus
GAR	Atilax_paludinosus
GAR	Bdeogale_nigripes
GAR	Canis_adustus
GAR	Canis_aureus
GAR	Cephalophus_monticola
GAR	Cephalophus_rufilatus
GAR	Cephalophus_silvicultor
GAR	Ceratotherium_simum
GAR	Cercocebus_galeritus
GAR	Cercopithecus_ascanius
GAR	Cercopithecus_neglectus
GAR	Chlorocebus_aethiops
GAR	Colobus_guereza
GAR	Crossarchus_alexandri
GAR	Dendrohyrax_dorsalis
GAR	Erythrocebus_patas
GAR	Felis_silvestris
GAR	Galago_senegalensis
GAR	Galagoides_demidoff
GAR	Galerella_sanguinea
GAR	Genetta_servalina
GAR	Genetta_tigrina
GAR	Giraffa_camelopardalis
GAR	Herpestes_ichneumon
GAR	Herpestes_naso
GAR	Heterohyrax_brucei
GAR	Hippotragus_equinus
GAR	Hylochoerus_meinertzhageni
GAR	Hystrix_cristata
GAR	Ichneumia_albicauda
GAR	Kobus_kob
GAR	Leptailurus_serval
GAR	Lepus_victoriae
GAR	Lophocebus_albigena
GAR	Loxodonta_africana
GAR	Lutra_maculicollis
GAR	Lycaon_pictus
GAR	Manis_gigantea
GAR	Manis_temminckii
GAR	Manis_tricuspis
GAR	Mellivora_capensis
GAR	Mungos_mungo
GAR	Nandinia_binotata
GAR	Okapia_johnstoni
GAR	Orycteropus_afer
GAR	Ourebia_ourebi
GAR	Pan_troglodytes
GAR	Panthera_leo
GAR	Panthera_pardus
GAR	Papio_cynocephalus
GAR	Phacochoerus_africanus
GAR	Piliocolobus_badius
GAR	Poelagus_marjorita
[truncated: 6,708 more rows]

## Sheet: Carnivore Comm Species Comp
SiteCode	Species
ABER	Aonyx_capensis
ABER	Atilax_paludinosus
ABER	Canis_adustus
ABER	Canis_mesomelas
ABER	Civettictis_civetta
ABER	Crocuta_crocuta
ABER	Felis_silvestris
ABER	Galerella_sanguinea
ABER	Genetta_tigrina
ABER	Ichneumia_albicauda
ABER	Ictonyx_striatus
ABER	Lycaon_pictus
ABER	Nandinia_binotata
ABER	Panthera_pardus
ABI-SHA	Aonyx_capensis
ABI-SHA	Atilax_paludinosus
ABI-SHA	Canis_adustus
ABI-SHA	Canis_aureus
ABI-SHA	Caracal_caracal
ABI-SHA	Civettictis_civetta
ABI-SHA	Crocuta_crocuta
ABI-SHA	Felis_silvestris
ABI-SHA	Galerella_sanguinea
ABI-SHA	Genetta_genetta
ABI-SHA	Genetta_maculata
ABI-SHA	Herpestes_ichneumon
ABI-SHA	Ichneumia_albicauda
ABI-SHA	Ictonyx_striatus
ABI-SHA	Leptailurus_serval
ABI-SHA	Mellivora_capensis
ABI-SHA	Otocyon_megalotis
ABI-SHA	Panthera_pardus
ABTL	Acinonyx_jubatus
ABTL	Canis_aureus
ABTL	Caracal_caracal
ABTL	Crocuta_crocuta
ABTL	Felis_silvestris
ABTL	Galerella_sanguinea
ABTL	Genetta_genetta
ABTL	Hyaena_hyaena
ABTL	Ictonyx_striatus
ABTL	Leptailurus_serval
ABTL	Mellivora_capensis
ABTL	Mungos_mungo
ABTL	Panthera_leo
ABTL	Panthera_pardus
ADX	Acinonyx_jubatus
ADX	Canis_aureus
ADX	Caracal_caracal
ADX	Felis_margarita
ADX	Felis_silvestris
ADX	Hyaena_hyaena
ADX	Ictonyx_libyca
ADX	Panthera_pardus
ADX	Vulpes_rueppellii
ADX	Vulpes_zerda
AIHS	Aonyx_capensis
AIHS	Canis_mesomelas
AIHS	Caracal_caracal
AIHS	Cynictis_penicillata
AIHS	Felis_nigripes
AIHS	Felis_silvestris
AIHS	Galerella_pulverulenta
AIHS	Genetta_genetta
AIHS	Ictonyx_striatus
AIHS	Mellivora_capensis
AIHS	Otocyon_megalotis
AIHS	Panthera_pardus
AIHS	Parahyaena_brunnea
AIHS	Proteles_cristatus
AIHS	Suricata_suricatta
AIHS	Vulpes_chama
AKA	Aonyx_capensis
AKA	Atilax_paludinosus
AKA	Canis_adustus
AKA	Canis_aureus
AKA	Canis_mesomelas
AKA	Civettictis_civetta
AKA	Crocuta_crocuta
AKA	Felis_silvestris
AKA	Galerella_sanguinea
AKA	Genetta_genetta
AKA	Genetta_servalina
AKA	Genetta_tigrina
AKA	Helogale_parvula
AKA	Herpestes_ichneumon
AKA	Hyaena_hyaena
AKA	Ichneumia_albicauda
AKA	Ictonyx_striatus
AKA	Leptailurus_serval
AKA	Lutra_maculicollis
AKA	Mellivora_capensis
AKA	Mungos_mungo
AKA	Nandinia_binotata
AKA	Panthera_leo
AKA	Panthera_pardus
AKA	Poecilogale_albinucha
AKA	Potamogale_velox
AKA	Profelis_aurata
AMB	Acinonyx_jubatus
AMB	Atilax_paludinosus
AMB	Canis_aureus
AMB	Canis_mesomelas
AMB	Caracal_caracal
AMB	Civettictis_civetta
AMB	Crocuta_crocuta
AMB	Felis_silvestris
AMB	Genetta_genetta
AMB	Hyaena_hyaena
AMB	Ichneumia_albicauda
AMB	Ictonyx_striatus
AMB	Leptailurus_serval
AMB	Mellivora_capensis
AMB	Otocyon_megalotis
AMB	Panthera_leo
AMB	Panthera_pardus
AMB	Proteles_cristatus
ANG	Acinonyx_jubatus
ANG	Caracal_caracal
ANG	Civettictis_civetta
ANG	Crocuta_crocuta
ANG	Felis_silvestris
ANG	Galerella_sanguinea
ANG	Genetta_angolensis
ANG	Genetta_genetta
ANG	Helogale_parvula
ANG	Herpestes_ichneumon
ANG	Ichneumia_albicauda
ANG	Ictonyx_striatus
ANG	Leptailurus_serval
ANG	Lycaon_pictus
ANG	Mellivora_capensis
ANG	Mungos_mungo
ANG	Panthera_leo
ANG	Panthera_pardus
ANG	Paracynictis_selousi
ANG	Parahyaena_brunnea
ANG	Proteles_cristatus
ANME	Aonyx_capensis
ANME	Atilax_paludinosus
ANME	Canis_adustus
ANME	Canis_aureus
ANME	Caracal_caracal
ANME	Crocuta_crocuta
ANME	Felis_silvestris
ANME	Genetta_genetta
ANME	Herpestes_ichneumon
ANME	Hyaena_hyaena
ANME	Ictonyx_striatus
ANME	Lutra_maculicollis
ANME	Mellivora_capensis
ANME	Mungos_mungo
ANME	Vulpes_pallida
APFR	Acinonyx_jubatus
APFR	Aonyx_capensis
APFR	Atilax_paludinosus
APFR	Canis_adustus
APFR	Caracal_caracal
APFR	Civettictis_civetta
APFR	Crocuta_crocuta
APFR	Felis_silvestris
APFR	Galerella_sanguinea
APFR	Genetta_genetta
APFR	Genetta_thierryi
APFR	Herpestes_ichneumon
APFR	Ichneumia_albicauda
APFR	Ictonyx_striatus
APFR	Leptailurus_serval
APFR	Lutra_maculicollis
APFR	Lycaon_pictus
APFR	Mellivora_capensis
APFR	Mungos_mungo
APFR	Panthera_leo
APFR	Panthera_pardus
ARAW	Acinonyx_jubatus
ARAW	Canis_mesomelas
ARAW	Caracal_caracal
ARAW	Crocuta_crocuta
ARAW	Lycaon_pictus
ARAW	Mellivora_capensis
ARAW	Panthera_leo
ARU	Atilax_paludinosus
ARU	Canis_adustus
ARU	Canis_mesomelas
ARU	Civettictis_civetta
ARU	Crocuta_crocuta
ARU	Galerella_sanguinea
ARU	Genetta_tigrina
ARU	Ictonyx_striatus
ARU	Leptailurus_serval
ARU	Nandinia_binotata
ARU	Panthera_pardus
ATFR	Acinonyx_jubatus
ATFR	Aonyx_capensis
ATFR	Atilax_paludinosus
ATFR	Canis_adustus
ATFR	Caracal_caracal
ATFR	Civettictis_civetta
ATFR	Crocuta_crocuta
ATFR	Felis_silvestris
ATFR	Galerella_sanguinea
ATFR	Genetta_genetta
ATFR	Genetta_thierryi
ATFR	Herpestes_ichneumon
ATFR	Ichneumia_albicauda
ATFR	Ictonyx_striatus
ATFR	Leptailurus_serval
ATFR	Lutra_maculicollis
ATFR	Lycaon_pictus
ATFR	Mellivora_capensis
ATFR	Mungos_mungo
ATFR	Panthera_leo
ATFR	Panthera_pardus
ATNR	Acinonyx_jubatus
ATNR	Canis_aureus
ATNR	Caracal_caracal
ATNR	Felis_margarita
ATNR	Felis_silvestris
ATNR	Genetta_genetta
ATNR	Hyaena_hyaena
ATNR	Ictonyx_libyca
ATNR	Ictonyx_striatus
ATNR	Lycaon_pictus
ATNR	Mellivora_capensis
ATNR	Panthera_pardus
ATNR	Vulpes_pallida
ATNR	Vulpes_rueppellii
ATNR	Vulpes_zerda
AWA	Acinonyx_jubatus
AWA	Canis_aureus
AWA	Canis_mesomelas
AWA	Caracal_caracal
AWA	Civettictis_civetta
AWA	Crocuta_crocuta
AWA	Felis_silvestris
AWA	Galerella_sanguinea
AWA	Genetta_abyssinica
AWA	Genetta_maculata
AWA	Helogale_parvula
AWA	Herpestes_ichneumon
AWA	Hyaena_hyaena
AWA	Ichneumia_albicauda
AWA	Ictonyx_striatus
AWA	Leptailurus_serval
AWA	Lutra_maculicollis
AWA	Lycaon_pictus
AWA	Mellivora_capensis
AWA	Otocyon_megalotis
AWA	Panthera_leo
AWA	Panthera_pardus
AWA	Proteles_cristatus
BAD	Aonyx_capensis
BAD	Atilax_paludinosus
BAD	Canis_adustus
BAD	Caracal_caracal
BAD	Civettictis_civetta
BAD	Crocuta_crocuta
BAD	Felis_silvestris
BAD	Galerella_sanguinea
BAD	Genetta_genetta
BAD	Genetta_maculata
BAD	Genetta_thierryi
BAD	Herpestes_ichneumon
BAD	Ichneumia_albicauda
BAD	Ictonyx_striatus
BAD	Leptailurus_serval
BAD	Lycaon_pictus
BAD	Mellivora_capensis
BAD	Mungos_gambianus
BAD	Mungos_mungo
BAD	Nandinia_binotata
BAD	Panthera_leo
BAD	Panthera_pardus
BAIE	Canis_adustus
BAIE	Caracal_caracal
BAIE	Genetta_genetta
BAIE	Hyaena_hyaena
BAIE	Ictonyx_libyca
BAIE	Mellivora_capensis
BALE	Atilax_paludinosus
BALE	Canis_aureus
BALE	Canis_simensis
BALE	Caracal_caracal
BALE	Civettictis_civetta
BALE	Crocuta_crocuta
BALE	Felis_silvestris
BALE	Genetta_maculata
BALE	Herpestes_ichneumon
BALE	Ichneumia_albicauda
BALE	Ictonyx_striatus
BALE	Leptailurus_serval
BALE	Lycaon_pictus
BALE	Mellivora_capensis
BALE	Panthera_leo
BALE	Panthera_pardus
BAN	Acinonyx_jubatus
BAN	Aonyx_capensis
BAN	Atilax_paludinosus
BAN	Canis_adustus
BAN	Caracal_caracal
BAN	Civettictis_civetta
BAN	Crocuta_crocuta
BAN	Felis_silvestris
BAN	Galerella_sanguinea
BAN	Genetta_angolensis
BAN	Genetta_tigrina
BAN	Helogale_parvula
BAN	Herpestes_ichneumon
BAN	Ichneumia_albicauda
BAN	Ictonyx_striatus
BAN	Leptailurus_serval
BAN	Lutra_maculicollis
BAN	Mellivora_capensis
BAN	Mungos_mungo
BAN	Panthera_leo
BAN	Panthera_pardus
BAN	Poecilogale_albinucha
BAN	Potamogale_velox
BAN	Rhynchogale_melleri
BANC	Canis_aureus
BANC	Caracal_caracal
BANC	Felis_silvestris
BANC	Hyaena_hyaena
BANC	Ictonyx_libyca
BANC	Mellivora_capensis
BASA	Acinonyx_jubatus
BASA	Aonyx_capensis
BASA	Atilax_paludinosus
BASA	Canis_aureus
BASA	Caracal_caracal
BASA	Civettictis_civetta
BASA	Crocuta_crocuta
BASA	Felis_silvestris
BASA	Galerella_sanguinea
BASA	Genetta_genetta
BASA	Genetta_tigrina
BASA	Herpestes_ichneumon
BASA	Hyaena_hyaena
BASA	Ichneumia_albicauda
BASA	Ictonyx_striatus
BASA	Leptailurus_serval
BASA	Lutra_maculicollis
BASA	Lycaon_pictus
BASA	Mellivora_capensis
BASA	Mungos_mungo
BASA	Panthera_leo
BASA	Panthera_pardus
BAZ	Aonyx_capensis
BAZ	Atilax_paludinosus
BAZ	Canis_adustus
BAZ	Caracal_caracal
BAZ	Civettictis_civetta
BAZ	Felis_silvestris
BAZ	Galerella_sanguinea
BAZ	Genetta_tigrina
BAZ	Helogale_parvula
BAZ	Herpestes_ichneumon
BAZ	Ichneumia_albicauda
BAZ	Ictonyx_striatus
BAZ	Leptailurus_serval
BAZ	Lycaon_pictus
BAZ	Mellivora_capensis
BAZ	Mungos_mungo
BAZ	Panthera_pardus
BBN	Aonyx_congicus
BBN	Atilax_paludinosus
BBN	Bdeogale_nigripes
BBN	Civettictis_civetta
BBN	Galerella_sanguinea
BBN	Genetta_servalina
BBN	Genetta_tigrina
BBN	Herpestes_naso
BBN	Lutra_maculicollis
BBN	Mellivora_capensis
BBN	Nandinia_binotata
BBN	Panthera_pardus
BBN	Poiana_richardsonii
BBN	Potamogale_velox
BBN	Profelis_aurata
BELZ	Canis_aureus
BELZ	Caracal_caracal
BELZ	Felis_silvestris
BELZ	Genetta_genetta
BELZ	Hyaena_hyaena
BELZ	Vulpes_vulpes
BEN	Acinonyx_jubatus
BEN	Aonyx_capensis
BEN	Aonyx_congicus
BEN	Atilax_paludinosus
BEN	Canis_adustus
BEN	Canis_aureus
BEN	Caracal_caracal
BEN	Civettictis_civetta
BEN	Crocuta_crocuta
BEN	Felis_silvestris
BEN	Galerella_sanguinea
BEN	Genetta_genetta
BEN	Genetta_tigrina
BEN	Herpestes_ichneumon
BEN	Ichneumia_albicauda
BEN	Ictonyx_striatus
BEN	Leptailurus_serval
BEN	Lutra_maculicollis
BEN	Lycaon_pictus
BEN	Mellivora_capensis
BEN	Mungos_mungo
BEN	Panthera_leo
BEN	Panthera_pardus
BF	Canis_adustus
BF	Civettictis_civetta
BF	Crocuta_crocuta
BF	Felis_silvestris
BF	Galerella_sanguinea
BF	Genetta_servalina
BF	Genetta_tigrina
BF	Herpestes_ichneumon
BF	Ichneumia_albicauda
BF	Ictonyx_striatus
BF	Leptailurus_serval
BF	Mellivora_capensis
BF	Mungos_mungo
BF	Panthera_leo
BF	Panthera_pardus
BF	Poecilogale_albinucha
BF	Profelis_aurata
BHINE	Acinonyx_jubatus
BHINE	Aonyx_capensis
BHINE	Atilax_paludinosus
BHINE	Canis_adustus
BHINE	Canis_mesomelas
BHINE	Caracal_caracal
BHINE	Civettictis_civetta
BHINE	Crocuta_crocuta
BHINE	Felis_silvestris
BHINE	Galerella_sanguinea
BHINE	Genetta_genetta
BHINE	Genetta_tigrina
BHINE	Helogale_parvula
BHINE	Herpestes_ichneumon
BHINE	Ichneumia_albicauda
BHINE	Ictonyx_striatus
BHINE	Leptailurus_serval
BHINE	Lutra_maculicollis
BHINE	Lycaon_pictus
BHINE	Mellivora_capensis
BHINE	Mungos_mungo
BHINE	Otocyon_megalotis
BHINE	Panthera_leo
BHINE	Panthera_pardus
BHINE	Parahyaena_brunnea
BHINE	Proteles_cristatus
BIK	Acinonyx_jubatus
BIK	Aonyx_capensis
BIK	Atilax_paludinosus
BIK	Canis_adustus
BIK	Canis_mesomelas
BIK	Caracal_caracal
BIK	Civettictis_civetta
BIK	Crocuta_crocuta
BIK	Felis_silvestris
BIK	Galerella_flavescens
BIK	Galerella_sanguinea
BIK	Genetta_genetta
BIK	Genetta_tigrina
BIK	Helogale_parvula
BIK	Herpestes_ichneumon
BIK	Ichneumia_albicauda
BIK	Ictonyx_striatus
BIK	Leptailurus_serval
BIK	Lycaon_pictus
BIK	Mellivora_capensis
BIK	Mungos_mungo
BIK	Otocyon_megalotis
BIK	Panthera_leo
BIK	Panthera_pardus
BIK	Paracynictis_selousi
BIK	Poecilogale_albinucha
BIK	Proteles_cristatus
BIN	Acinonyx_jubatus
BIN	Aonyx_capensis
BIN	Atilax_paludinosus
BIN	Canis_adustus
BIN	Canis_aureus
BIN	Caracal_caracal
BIN	Civettictis_civetta
BIN	Crocuta_crocuta
BIN	Felis_silvestris
BIN	Galerella_sanguinea
BIN	Genetta_genetta
BIN	Genetta_tigrina
BIN	Herpestes_ichneumon
BIN	Ichneumia_albicauda
BIN	Ictonyx_striatus
BIN	Leptailurus_serval
BIN	Lutra_maculicollis
BIN	Lycaon_pictus
BIN	Mellivora_capensis
BIN	Mungos_mungo
BIN	Panthera_leo
BIN	Panthera_pardus
BON	Aonyx_capensis
BON	Atilax_paludinosus
BON	Canis_adustus
BON	Caracal_caracal
BON	Civettictis_civetta
BON	Crocuta_crocuta
BON	Felis_silvestris
BON	Galerella_sanguinea
BON	Genetta_genetta
BON	Genetta_maculata
BON	Genetta_thierryi
BON	Herpestes_ichneumon
BON	Ichneumia_albicauda
BON	Ictonyx_striatus
BON	Leptailurus_serval
BON	Lutra_maculicollis
BON	Lycaon_pictus
BON	Mellivora_capensis
BON	Mungos_mungo
BON	Panthera_leo
BON	Panthera_pardus
BOUH	Canis_aureus
BOUH	Caracal_caracal
BOUH	Felis_silvestris
BOUH	Genetta_genetta
BOUH	Hyaena_hyaena
BOUH	Ictonyx_libyca
BOUH	Vulpes_rueppellii
BOUH	Vulpes_vulpes
BUF	Aonyx_capensis
BUF	Atilax_paludinosus
BUF	Canis_adustus
BUF	Canis_mesomelas
BUF	Caracal_caracal
BUF	Civettictis_civetta
BUF	Crocuta_crocuta
BUF	Felis_silvestris
BUF	Galerella_sanguinea
BUF	Genetta_genetta
BUF	Helogale_parvula
BUF	Herpestes_ichneumon
BUF	Ichneumia_albicauda
BUF	Ictonyx_striatus
BUF	Leptailurus_serval
BUF	Lycaon_pictus
BUF	Mellivora_capensis
BUF	Mungos_mungo
BUF	Panthera_leo
BUF	Panthera_pardus
BUF	Paracynictis_selousi
BUF	Poecilogale_albinucha
CHAM	Canis_aureus
CHAM	Caracal_caracal
CHAM	Felis_silvestris
CHAM	Genetta_genetta
CHAM	Herpestes_ichneumon
CHAM	Hyaena_hyaena
CHAM	Ictonyx_libyca
CHAM	Lutra_lutra
CHAM	Vulpes_rueppellii
CHAM	Vulpes_vulpes
CHO	Acinonyx_jubatus
CHO	Aonyx_capensis
CHO	Canis_adustus
CHO	Canis_mesomelas
CHO	Caracal_caracal
CHO	Civettictis_civetta
CHO	Crocuta_crocuta
CHO	Cynictis_penicillata
CHO	Felis_silvestris
CHO	Galerella_sanguinea
CHO	Genetta_tigrina
CHO	Ictonyx_striatus
CHO	Leptailurus_serval
CHO	Lutra_maculicollis
CHO	Lycaon_pictus
CHO	Mellivora_capensis
CHO	Mungos_mungo
CHO	Otocyon_megalotis
CHO	Panthera_leo
CHO	Panthera_pardus
CHO	Proteles_cristatus
CLB	Aonyx_capensis
CLB	Atilax_paludinosus
CLB	Canis_adustus
CLB	Caracal_caracal
CLB	Civettictis_civetta
CLB	Crocuta_crocuta
CLB	Felis_silvestris
CLB	Genetta_genetta
CLB	Herpestes_ichneumon
CLB	Hyaena_hyaena
CLB	Ichneumia_albicauda
CLB	Ictonyx_striatus
CLB	Leptailurus_serval
CLB	Mellivora_capensis
CLB	Mungos_mungo
CLB	Vulpes_pallida
CMA	Aonyx_congicus
CMA	Atilax_paludinosus
CMA	Bdeogale_nigripes
CMA	Civettictis_civetta
CMA	Crossarchus_obscurus
CMA	Genetta_servalina
CMA	Genetta_tigrina
CMA	Herpestes_naso
CMA	Lutra_maculicollis
CMA	Mellivora_capensis
CMA	Nandinia_binotata
CMA	Panthera_pardus
CMA	Poiana_richardsonii
CMA	Potamogale_velox
CMA	Profelis_aurata
COM	Aonyx_capensis
COM	Atilax_paludinosus
COM	Canis_adustus
COM	Civettictis_civetta
COM	Crocuta_crocuta
COM	Crossarchus_obscurus
COM	Felis_silvestris
COM	Galerella_sanguinea
COM	Genetta_maculata
COM	Herpestes_ichneumon
COM	Ichneumia_albicauda
COM	Leptailurus_serval
COM	Lutra_maculicollis
COM	Mellivora_capensis
COM	Mungos_gambianus
COM	Nandinia_binotata
COM	Panthera_leo
COM	Panthera_pardus
COM	Profelis_aurata
CON	Aonyx_congicus
CON	Atilax_paludinosus
CON	Bdeogale_nigripes
CON	Canis_adustus
CON	Civettictis_civetta
CON	Crocuta_crocuta
CON	Felis_silvestris
CON	Genetta_servalina
CON	Genetta_tigrina
CON	Herpestes_ichneumon
CON	Herpestes_naso
CON	Leptailurus_serval
CON	Lutra_maculicollis
CON	Mellivora_capensis
CON	Nandinia_binotata
CON	Panthera_pardus
CON	Poecilogale_albinucha
CON	Poiana_richardsonii
CON	Potamogale_velox
CON	Profelis_aurata
CONG	Aonyx_congicus
CONG	Atilax_paludinosus
CONG	Civettictis_civetta
CONG	Crossarchus_obscurus
CONG	Galerella_sanguinea
CONG	Genetta_servalina
CONG	Genetta_tigrina
CONG	Genetta_victoriae
CONG	Herpestes_naso
CONG	Ichneumia_albicauda
CONG	Leptailurus_serval
CONG	Lutra_maculicollis
CONG	Mellivora_capensis
CONG	Nandinia_binotata
CONG	Panthera_pardus
CONG	Potamogale_velox
CONG	Profelis_aurata
CROS	Aonyx_capensis
CROS	Atilax_paludinosus
CROS	Bdeogale_nigripes
CROS	Civettictis_civetta
CROS	Crossarchus_obscurus
CROS	Genetta_maculata
CROS	Herpestes_naso
CROS	Nandinia_binotata
CROS	Panthera_pardus
CROS	Potamogale_velox
DEUX	Aonyx_capensis
DEUX	Atilax_paludinosus
DEUX	Canis_adustus
DEUX	Caracal_caracal
DEUX	Civettictis_civetta
DEUX	Crocuta_crocuta
DEUX	Felis_silvestris
DEUX	Galerella_sanguinea
DEUX	Genetta_genetta
DEUX	Genetta_maculata
DEUX	Genetta_thierryi
DEUX	Herpestes_ichneumon
DEUX	Ichneumia_albicauda
DEUX	Ictonyx_striatus
DEUX	Leptailurus_serval
DEUX	Lutra_maculicollis
DEUX	Lycaon_pictus
DEUX	Mellivora_capensis
DEUX	Mungos_mungo
DEUX	Panthera_leo
DEUX	Panthera_pardus
DIAW	Aonyx_capensis
DIAW	Canis_adustus
DIAW	Caracal_caracal
DIAW	Crossarchus_alexandri
DIAW	Felis_silvestris
DIAW	Genetta_genetta
DIAW	Genetta_thierryi
DIAW	Herpestes_ichneumon
DIAW	Hyaena_hyaena
DIAW	Ichneumia_albicauda
DIAW	Ictonyx_libyca
DIAW	Ictonyx_striatus
DIAW	Mellivora_capensis
DIAW	Mungos_mungo
DIAW	Panthera_pardus
DIAW	Vulpes_pallida
DJU	Canis_aureus
DJU	Caracal_caracal
DJU	Felis_silvestris
DJU	Genetta_genetta
DJU	Herpestes_ichneumon
DJU	Hyaena_hyaena
DJU	Leptailurus_serval
DJU	Lutra_lutra
DJU	Vulpes_vulpes
DVGP	Acinonyx_jubatus
DVGP	Canis_mesomelas
DVGP	Caracal_caracal
DVGP	Cynictis_penicillata
DVGP	Felis_nigripes
DVGP	Galerella_sanguinea
DVGP	Genetta_genetta
DVGP	Ictonyx_striatus
DVGP	Lycaon_pictus
DVGP	Mellivora_capensis
DVGP	Mungos_mungo
DVGP	Panthera_pardus
DVGP	Parahyaena_brunnea
DVGP	Proteles_cristatus
DVGP	Suricata_suricatta
DVGP	Vulpes_chama
ELB	Canis_aureus
ELB	Caracal_caracal
ELB	Felis_margarita
ELB	Felis_silvestris
ELB	Genetta_genetta
ELB	Ichneumia_albicauda
ELB	Ictonyx_libyca
ELB	Ictonyx_striatus
ELB	Panthera_pardus
ELB	Proteles_cristatus
ELB	Vulpes_cana
ELB	Vulpes_rueppellii
ELB	Vulpes_zerda
ENIG	Atilax_paludinosus
ENIG	Civettictis_civetta
ENIG	Crossarchus_obscurus
ENIG	Genetta_maculata
ENIG	Leptailurus_serval
ENIG	Nandinia_binotata
ETO	Acinonyx_jubatus
ETO	Canis_mesomelas
ETO	Caracal_caracal
ETO	Crocuta_crocuta
ETO	Cynictis_penicillata
ETO	Felis_nigripes
ETO	Felis_silvestris
ETO	Galerella_flavescens
ETO	Galerella_sanguinea
ETO	Genetta_genetta
ETO	Helogale_parvula
ETO	Ictonyx_striatus
ETO	Lycaon_pictus
ETO	Mellivora_capensis
ETO	Mungos_mungo
ETO	Otocyon_megalotis
ETO	Panthera_leo
ETO	Panthera_pardus
ETO	Suricata_suricatta
ETO	Vulpes_chama
FADA	Acinonyx_jubatus
FADA	Canis_aureus
FADA	Caracal_caracal
FADA	Felis_margarita
FADA	Genetta_genetta
FADA	Hyaena_hyaena
FADA	Ictonyx_libyca
FADA	Ictonyx_striatus
FADA	Mellivora_capensis
FADA	Vulpes_pallida
FADA	Vulpes_zerda
GAD	Canis_aureus
GAD	Caracal_caracal
GAD	Felis_margarita
GAD	Felis_silvestris
GAD	Genetta_genetta
GAD	Hyaena_hyaena
GAD	Ictonyx_libyca
GAD	Ictonyx_striatus
GAD	Mellivora_capensis
GAD	Mungos_mungo
GAD	Panthera_pardus
GAD	Vulpes_pallida
GAM	Atilax_paludinosus
GAM	Canis_adustus
GAM	Canis_aureus
GAM	Caracal_caracal
GAM	Civettictis_civetta
GAM	Crocuta_crocuta
GAM	Felis_silvestris
GAM	Galerella_sanguinea
GAM	Genetta_genetta
GAM	Genetta_maculata
GAM	Herpestes_ichneumon
GAM	Ichneumia_albicauda
GAM	Ictonyx_striatus
GAM	Leptailurus_serval
GAM	Lutra_maculicollis
GAM	Lycaon_pictus
GAM	Mellivora_capensis
GAM	Mungos_mungo
GAM	Panthera_leo
GAM	Panthera_pardus
GAR	Aonyx_capensis
GAR	Aonyx_congicus
GAR	Atilax_paludinosus
GAR	Bdeogale_nigripes
GAR	Canis_adustus
GAR	Canis_aureus
GAR	Crossarchus_alexandri
GAR	Felis_silvestris
GAR	Galerella_sanguinea
GAR	Genetta_servalina
GAR	Genetta_tigrina
GAR	Herpestes_ichneumon
GAR	Herpestes_naso
GAR	Ichneumia_albicauda
GAR	Leptailurus_serval
GAR	Lutra_maculicollis
GAR	Lycaon_pictus
GAR	Mellivora_capensis
GAR	Mungos_mungo
GAR	Nandinia_binotata
GAR	Panthera_leo
GAR	Panthera_pardus
GAR	Potamogale_velox
GAR	Profelis_aurata
GEM	Acinonyx_jubatus
GEM	Canis_mesomelas
GEM	Caracal_caracal
GEM	Crocuta_crocuta
GEM	Cynictis_penicillata
GEM	Felis_nigripes
GEM	Felis_silvestris
GEM	Galerella_sanguinea
GEM	Genetta_genetta
GEM	Ictonyx_striatus
GEM	Lycaon_pictus
GEM	Mellivora_capensis
GEM	Otocyon_megalotis
GEM	Panthera_leo
GEM	Panthera_pardus
GEM	Parahyaena_brunnea
GEM	Proteles_cristatus
GEM	Suricata_suricatta
GEM	Vulpes_chama
GHO	Acinonyx_jubatus
GHO	Aonyx_capensis
GHO	Atilax_paludinosus
GHO	Canis_adustus
GHO	Canis_mesomelas
GHO	Caracal_caracal
GHO	Civettictis_civetta
GHO	Crocuta_crocuta
GHO	Felis_silvestris
GHO	Galerella_sanguinea
GHO	Genetta_genetta
GHO	Genetta_tigrina
GHO	Helogale_parvula
GHO	Ichneumia_albicauda
GHO	Ictonyx_striatus
GHO	Leptailurus_serval
GHO	Lycaon_pictus
GHO	Mellivora_capensis
GHO	Mungos_mungo
GHO	Nandinia_binotata
GHO	Otocyon_megalotis
GHO	Panthera_leo
GHO	Panthera_pardus
GHO	Paracynictis_selousi
GHO	Parahyaena_brunnea
GHO	Poecilogale_albinucha
GHO	Rhynchogale_melleri
GILE	Aonyx_capensis
GILE	Atilax_paludinosus
GILE	Bdeogale_crassicauda
GILE	Canis_adustus
GILE	Caracal_caracal
GILE	Civettictis_civetta
GILE	Crocuta_crocuta
GILE	Felis_silvestris
GILE	Galerella_sanguinea
GILE	Genetta_tigrina
GILE	Helogale_parvula
GILE	Herpestes_ichneumon
GILE	Ichneumia_albicauda
GILE	Ictonyx_striatus
GILE	Leptailurus_serval
GILE	Lutra_maculicollis
GILE	Lycaon_pictus
GILE	Mellivora_capensis
GILE	Mungos_mungo
GILE	Panthera_leo
GILE	Panthera_pardus
GILE	Poecilogale_albinucha
GILE	Rhynchogale_melleri
GISH	Aonyx_congicus
GISH	Atilax_paludinosus
GISH	Canis_adustus
GISH	Canis_aureus
GISH	Civettictis_civetta
GISH	Crocuta_crocuta
GISH	Felis_silvestris
GISH	Galerella_sanguinea
GISH	Genetta_servalina
GISH	Genetta_tigrina
GISH	Herpestes_ichneumon
GISH	Hyaena_hyaena
GISH	Ichneumia_albicauda
GISH	Ictonyx_striatus
GISH	Leptailurus_serval
GISH	Lutra_maculicollis
GISH	Mellivora_capensis
GISH	Mungos_mungo
GISH	Nandinia_binotata
GISH	Panthera_leo
GISH	Panthera_pardus
GISH	Poecilogale_albinucha
GISH	Potamogale_velox
GISH	Profelis_aurata
GOLD	Aonyx_capensis
GOLD	Atilax_paludinosus
GOLD	Canis_mesomelas
GOLD	Caracal_caracal
GOLD	Cynictis_penicillata
GOLD	Felis_silvestris
GOLD	Galerella_pulverulenta
GOLD	Genetta_tigrina
GOLD	Ichneumia_albicauda
GOLD	Ictonyx_striatus
GOLD	Lutra_maculicollis
GOLD	Proteles_cristatus
GOMB	Aonyx_capensis
GOMB	Atilax_paludinosus
GOMB	Canis_aureus
GOMB	Canis_mesomelas
GOMB	Civettictis_civetta
GOMB	Crocuta_crocuta
GOMB	Felis_silvestris
GOMB	Galerella_sanguinea
GOMB	Genetta_genetta
GOMB	Genetta_servalina
GOMB	Genetta_tigrina
GOMB	Helogale_parvula
GOMB	Herpestes_ichneumon
GOMB	Ichneumia_albicauda
GOMB	Ictonyx_striatus
GOMB	Leptailurus_serval
GOMB	Lutra_maculicollis
GOMB	Lycaon_pictus
GOMB	Mellivora_capensis
GOMB	Mungos_mungo
GOMB	Nandinia_binotata
GOMB	Panthera_leo
GOMB	Panthera_pardus
GOMB	Poecilogale_albinucha
GOMB	Profelis_aurata
GOR	Aonyx_capensis
GOR	Atilax_paludinosus
GOR	Bdeogale_crassicauda
GOR	Canis_adustus
GOR	Caracal_caracal
GOR	Civettictis_civetta
GOR	Crocuta_crocuta
GOR	Felis_silvestris
GOR	Galerella_sanguinea
GOR	Genetta_tigrina
GOR	Helogale_parvula
GOR	Herpestes_ichneumon
GOR	Ichneumia_albicauda
GOR	Ictonyx_striatus
GOR	Leptailurus_serval
GOR	Lutra_maculicollis
GOR	Lycaon_pictus
GOR	Mellivora_capensis
GOR	Mungos_mungo
GOR	Panthera_leo
GOR	Panthera_pardus
GOR	Rhynchogale_melleri
GUS	Aonyx_capensis
GUS	Atilax_paludinosus
GUS	Canis_adustus
GUS	Caracal_caracal
GUS	Civettictis_civetta
GUS	Crocuta_crocuta
GUS	Felis_silvestris
GUS	Galerella_sanguinea
GUS	Genetta_maculata
GUS	Genetta_thierryi
GUS	Herpestes_ichneumon
GUS	Ichneumia_albicauda
GUS	Ictonyx_striatus
GUS	Leptailurus_serval
GUS	Lutra_maculicollis
GUS	Lycaon_pictus
GUS	Mellivora_capensis
GUS	Mungos_gambianus
GUS	Panthera_leo
GUS	Panthera_pardus
GUS	Vulpes_pallida
HAD	Canis_aureus
HAD	Canis_mesomelas
HAD	Caracal_caracal
HAD	Civettictis_civetta
HAD	Crocuta_crocuta
HAD	Felis_silvestris
HAD	Galerella_sanguinea
HAD	Hyaena_hyaena
HAD	Ictonyx_striatus
HAD	Leptailurus_serval
HAD	Mellivora_capensis
HAD	Mungos_mungo
HAD	Panthera_leo
HAD	Panthera_pardus
HAD	Proteles_cristatus
HLU	Acinonyx_jubatus
HLU	Aonyx_capensis
HLU	Atilax_paludinosus
HLU	Canis_adustus
HLU	Canis_mesomelas
HLU	Civettictis_civetta
HLU	Crocuta_crocuta
HLU	Felis_silvestris
HLU	Galerella_sanguinea
HLU	Genetta_tigrina
HLU	Herpestes_ichneumon
HLU	Ichneumia_albicauda
HLU	Ictonyx_striatus
HLU	Leptailurus_serval
HLU	Lutra_maculicollis
HLU	Lycaon_pictus
HLU	Mellivora_capensis
HLU	Mungos_mungo
HLU	Panthera_leo
HLU	Panthera_pardus
HLU	Paracynictis_selousi
HLU	Proteles_cristatus
HWA	Acinonyx_jubatus
HWA	Canis_adustus
HWA	Canis_mesomelas
HWA	Caracal_caracal
HWA	Civettictis_civetta
HWA	Crocuta_crocuta
HWA	Cynictis_penicillata
HWA	Felis_silvestris
HWA	Galerella_sanguinea
HWA	Genetta_genetta
HWA	Genetta_tigrina
HWA	Helogale_parvula
HWA	Herpestes_ichneumon
HWA	Ichneumia_albicauda
HWA	Ictonyx_striatus
HWA	Leptailurus_serval
HWA	Lycaon_pictus
HWA	Mellivora_capensis
HWA	Mungos_mungo
HWA	Otocyon_megalotis
HWA	Panthera_leo
HWA	Panthera_pardus
HWA	Paracynictis_selousi
HWA	Parahyaena_brunnea
HWA	Poecilogale_albinucha
HWA	Proteles_cristatus
ILES	Aonyx_capensis
ILES	Atilax_paludinosus
ILES	Canis_adustus
ILES	Civettictis_civetta
ILES	Crocuta_crocuta
ILES	Felis_silvestris
ILES	Galerella_sanguinea
ILES	Genetta_maculata
ILES	Genetta_thierryi
ILES	Herpestes_ichneumon
ILES	Ichneumia_albicauda
ILES	Ictonyx_striatus
ILES	Leptailurus_serval
ILES	Mellivora_capensis
ILES	Mungos_gambianus
ILES	Mungos_mungo
ILES	Nandinia_binotata
ILES	Panthera_pardus
ILES	Profelis_aurata
IONA	Acinonyx_jubatus
IONA	Aonyx_capensis
IONA	Atilax_paludinosus
IONA	Canis_adustus
IONA	Canis_mesomelas
IONA	Caracal_caracal
IONA	Crocuta_crocuta
IONA	Cynictis_penicillata
IONA	Felis_nigripes
IONA	Felis_silvestris
IONA	Galerella_flavescens
IONA	Galerella_sanguinea
IONA	Genetta_genetta
IONA	Helogale_parvula
IONA	Ictonyx_striatus
IONA	Mellivora_capensis
IONA	Mungos_mungo
IONA	Otocyon_megalotis
IONA	Panthera_leo
IONA	Panthera_pardus
IONA	Parahyaena_brunnea
IONA	Proteles_cristatus
IONA	Suricata_suricatta
IONA	Vulpes_chama
ITG	Atilax_paludinosus
ITG	Bdeogale_crassicauda
ITG	Canis_adustus
ITG	Crocuta_crocuta
ITG	Helogale_parvula
ITG	Ichneumia_albicauda
ITG	Lycaon_pictus
ITG	Mungos_mungo
ITG	Panthera_leo
ITG	Panthera_pardus
KAB	Aonyx_capensis
KAB	Atilax_paludinosus
KAB	Canis_adustus
KAB	Caracal_caracal
KAB	Civettictis_civetta
KAB	Crocuta_crocuta
KAB	Felis_silvestris
KAB	Galerella_sanguinea
KAB	Genetta_genetta
KAB	Genetta_thierryi
KAB	Herpestes_ichneumon
KAB	Ichneumia_albicauda
KAB	Ictonyx_striatus
KAB	Leptailurus_serval
KAB	Lutra_maculicollis
KAB	Lycaon_pictus
KAB	Mellivora_capensis
KAB	Mungos_mungo
KAB	Panthera_leo
KAB	Panthera_pardus
KAFF	Acinonyx_jubatus
KAFF	Aonyx_capensis
KAFF	Atilax_paludinosus
KAFF	Canis_adustus
KAFF	Civettictis_civetta
KAFF	Crocuta_crocuta
KAFF	Felis_silvestris
KAFF	Genetta_genetta
KAFF	Genetta_tigrina
KAFF	Herpestes_ichneumon
KAFF	Ictonyx_striatus
KAFF	Leptailurus_serval
KAFF	Lutra_maculicollis
KAFF	Lycaon_pictus
KAFF	Panthera_leo
KAK	Canis_adustus
KAK	Civettictis_civetta
KAK	Crocuta_crocuta
KAK	Genetta_tigrina
KAK	Herpestes_ichneumon
KAK	Leptailurus_serval
KAK	Nandinia_binotata
KAK	Panthera_pardus
KALT	Canis_mesomelas
KALT	Cynictis_penicillata
KALT	Genetta_genetta
KALT	Otocyon_megalotis
KALT	Parahyaena_brunnea
KALT	Suricata_suricatta
KALT	Vulpes_chama
KAM	Aonyx_capensis
KAM	Aonyx_congicus
KAM	Atilax_paludinosus
KAM	Canis_adustus
KAM	Caracal_caracal
KAM	Civettictis_civetta
KAM	Crocuta_crocuta
KAM	Felis_silvestris
KAM	Galerella_sanguinea
KAM	Genetta_angolensis
KAM	Genetta_genetta
KAM	Genetta_tigrina
KAM	Helogale_parvula
KAM	Herpestes_ichneumon
KAM	Ichneumia_albicauda
KAM	Ictonyx_striatus
KAM	Leptailurus_serval
KAM	Lutra_maculicollis
KAM	Lycaon_pictus
KAM	Mellivora_capensis
KAM	Mungos_mungo
KAM	Panthera_leo
KAM	Panthera_pardus
KAM	Paracynictis_selousi
KAM	Poecilogale_albinucha
KAM	Potamogale_velox
KAM	Rhynchogale_melleri
KANG	Aonyx_capensis
KANG	Aonyx_congicus
KANG	Atilax_paludinosus
KANG	Civettictis_civetta
KANG	Crocuta_crocuta
KANG	Felis_silvestris
KANG	Galerella_sanguinea
KANG	Genetta_angolensis
KANG	Genetta_genetta
KANG	Genetta_tigrina
KANG	Helogale_parvula
KANG	Herpestes_ichneumon
KANG	Ichneumia_albicauda
KANG	Ictonyx_striatus
KANG	Leptailurus_serval
KANG	Lutra_maculicollis
KANG	Lycaon_pictus
KANG	Mellivora_capensis
KANG	Mungos_mungo
KANG	Nandinia_binotata
KANG	Panthera_leo
KANG	Panthera_pardus
KANG	Poecilogale_albinucha
KANG	Potamogale_velox
KANG	Profelis_aurata
KAP	Acinonyx_jubatus
KAP	Aonyx_capensis
KAP	Canis_mesomelas
KAP	Caracal_caracal
KAP	Civettictis_civetta
KAP	Crocuta_crocuta
KAP	Felis_silvestris
KAP	Galerella_sanguinea
KAP	Genetta_genetta
KAP	Genetta_tigrina
KAP	Helogale_parvula
KAP	Herpestes_ichneumon
KAP	Ichneumia_albicauda
KAP	Ictonyx_striatus
KAP	Leptailurus_serval
KAP	Mellivora_capensis
KAP	Mungos_mungo
KAP	Panthera_leo
KAP	Panthera_pardus
KAP	Parahyaena_brunnea
KAP	Proteles_cristatus
KAS	Acinonyx_jubatus
KAS	Aonyx_capensis
KAS	Atilax_paludinosus
KAS	Bdeogale_crassicauda
KAS	Canis_adustus
KAS	Caracal_caracal
KAS	Civettictis_civetta
KAS	Crocuta_crocuta
KAS	Felis_silvestris
KAS	Galerella_sanguinea
KAS	Genetta_angolensis
KAS	Genetta_tigrina
KAS	Helogale_parvula
KAS	Herpestes_ichneumon
KAS	Ichneumia_albicauda
KAS	Ictonyx_striatus
KAS	Leptailurus_serval
KAS	Lutra_maculicollis
KAS	Lycaon_pictus
KAS	Mellivora_capensis
KAS	Mungos_mungo
KAS	Panthera_leo
KAS	Panthera_pardus
KAS	Paracynictis_selousi
KAS	Poecilogale_albinucha
KAS	Rhynchogale_melleri
KBIR	Aonyx_congicus
KBIR	Atilax_paludinosus
KBIR	Canis_adustus
KBIR	Civettictis_civetta
KBIR	Crocuta_crocuta
KBIR	Felis_silvestris
KBIR	Galerella_sanguinea
KBIR	Genetta_servalina
KBIR	Genetta_tigrina
KBIR	Herpestes_ichneumon
KBIR	Hyaena_hyaena
KBIR	Ichneumia_albicauda
KBIR	Ictonyx_striatus
KBIR	Leptailurus_serval
KBIR	Lutra_maculicollis
KBIR	Mellivora_capensis
KBIR	Mungos_mungo
KBIR	Nandinia_binotata
KBIR	Panthera_leo
KBIR	Panthera_pardus
KBIR	Poecilogale_albinucha
KBIR	Potamogale_velox
KBIR	Profelis_aurata
KFAL	Atilax_paludinosus
KFAL	Canis_mesomelas
KFAL	Civettictis_civetta
KFAL	Crocuta_crocuta
KFAL	Felis_silvestris
KFAL	Galerella_sanguinea
KFAL	Genetta_tigrina
KFAL	Herpestes_ichneumon
KFAL	Ichneumia_albicauda
KFAL	Ictonyx_striatus
KFAL	Leptailurus_serval
KFAL	Lutra_maculicollis
KFAL	Lycaon_pictus
KFAL	Mellivora_capensis
KFAL	Mungos_mungo
KFAL	Panthera_leo
KFAL	Panthera_pardus
KFNP	Acinonyx_jubatus
KFNP	Aonyx_capensis
KFNP	Atilax_paludinosus
KFNP	Canis_adustus
KFNP	Caracal_caracal
KFNP	Civettictis_civetta
KFNP	Crocuta_crocuta
KFNP	Felis_silvestris
KFNP	Galerella_sanguinea
KFNP	Genetta_genetta
KFNP	Genetta_tigrina
KFNP	Herpestes_ichneumon
KFNP	Ichneumia_albicauda
KFNP	Ictonyx_striatus
KFNP	Leptailurus_serval
KFNP	Lutra_maculicollis
KFNP	Lycaon_pictus
KFNP	Mellivora_capensis
KFNP	Mungos_mungo
KFNP	Panthera_leo
KFNP	Panthera_pardus
KFNP	Proteles_cristatus
KHA	Acinonyx_jubatus
KHA	Canis_adustus
KHA	Canis_mesomelas
KHA	Caracal_caracal
KHA	Civettictis_civetta
KHA	Crocuta_crocuta
KHA	Cynictis_penicillata
KHA	Felis_silvestris
KHA	Galerella_sanguinea
KHA	Genetta_genetta
KHA	Genetta_tigrina
KHA	Helogale_parvula
KHA	Ichneumia_albicauda
KHA	Ictonyx_striatus
KHA	Leptailurus_serval
KHA	Lycaon_pictus
KHA	Mellivora_capensis
KHA	Mungos_mungo
KHA	Otocyon_megalotis
KHA	Panthera_leo
KHA	Panthera_pardus
KHA	Paracynictis_selousi
KHA	Proteles_cristatus
KIB	Aonyx_capensis
KIB	Atilax_paludinosus
KIB	Bdeogale_nigripes
KIB	Canis_adustus
KIB	Canis_aureus
KIB	Canis_mesomelas
KIB	Civettictis_civetta
KIB	Crocuta_crocuta
KIB	Crossarchus_alexandri
KIB	Felis_silvestris
KIB	Galerella_sanguinea
KIB	Genetta_genetta
KIB	Genetta_servalina
KIB	Genetta_tigrina
KIB	Herpestes_ichneumon
KIB	Ichneumia_albicauda
KIB	Ictonyx_striatus
KIB	Leptailurus_serval
KIB	Lutra_maculicollis
KIB	Mellivora_capensis
KIB	Mungos_mungo
KIB	Nandinia_binotata
KIB	Panthera_leo
KIB	Panthera_pardus
KIB	Poecilogale_albinucha
KIB	Potamogale_velox
KIB	Profelis_aurata
KID	Acinonyx_jubatus
KID	Canis_adustus
KID	Canis_mesomelas
KID	Caracal_caracal
KID	Crocuta_crocuta
KID	Felis_silvestris
KID	Genetta_genetta
KID	Genetta_tigrina
KID	Herpestes_ichneumon
KID	Hyaena_hyaena
KID	Ichneumia_albicauda
KID	Mungos_mungo
KID	Otocyon_megalotis
KID	Panthera_leo
KID	Panthera_pardus
KID	Proteles_cristatus
KIS	Acinonyx_jubatus
KIS	Aonyx_capensis
KIS	Bdeogale_crassicauda
KIS	Civettictis_civetta
KIS	Crocuta_crocuta
KIS	Felis_silvestris
KIS	Galerella_sanguinea
KIS	Genetta_genetta
KIS	Genetta_tigrina
KIS	Helogale_parvula
KIS	Herpestes_ichneumon
KIS	Ichneumia_albicauda
KIS	Ictonyx_striatus
KIS	Leptailurus_serval
KIS	Lutra_maculicollis
KIS	Lycaon_pictus
KIS	Mellivora_capensis
KIS	Mungos_mungo
KIS	Panthera_leo
KIS	Panthera_pardus
KIS	Poecilogale_albinucha
KIZ	Acinonyx_jubatus
KIZ	Aonyx_capensis
KIZ	Atilax_paludinosus
KIZ	Canis_adustus
KIZ	Canis_mesomelas
KIZ	Caracal_caracal
KIZ	Civettictis_civetta
KIZ	Crocuta_crocuta
KIZ	Felis_silvestris
KIZ	Galerella_sanguinea
KIZ	Genetta_genetta
KIZ	Genetta_tigrina
KIZ	Helogale_parvula
KIZ	Herpestes_ichneumon
KIZ	Hyaena_hyaena
KIZ	Ichneumia_albicauda
KIZ	Ictonyx_striatus
KIZ	Leptailurus_serval
KIZ	Lycaon_pictus
KIZ	Mellivora_capensis
KIZ	Mungos_mungo
KIZ	Nandinia_binotata
KIZ	Otocyon_megalotis
KIZ	Panthera_leo
KIZ	Panthera_pardus
KIZ	Poecilogale_albinucha
KIZ	Proteles_cristatus
KIZ	Rhynchogale_melleri
KNYS	Atilax_paludinosus
KNYS	Galerella_sanguinea
KNYS	Genetta_tigrina
KNYS	Nandinia_binotata
KNYS	Panthera_pardus
KNYS	Rhynchogale_melleri
KOR	Aonyx_capensis
KOR	Atilax_paludinosus
KOR	Bdeogale_nigripes
KOR	Civettictis_civetta
KOR	Crossarchus_obscurus
KOR	Genetta_servalina
KOR	Genetta_thierryi
KOR	Genetta_tigrina
KOR	Herpestes_naso
KOR	Lutra_maculicollis
KOR	Mellivora_capensis
KOR	Mungos_mungo
KOR	Nandinia_binotata
KOR	Panthera_pardus
KOR	Potamogale_velox
KOR	Profelis_aurata
KOU	Acinonyx_jubatus
KOU	Aonyx_capensis
KOU	Atilax_paludinosus
KOU	Canis_adustus
KOU	Caracal_caracal
KOU	Civettictis_civetta
KOU	Crocuta_crocuta
KOU	Felis_silvestris
KOU	Galerella_sanguinea
KOU	Genetta_genetta
KOU	Genetta_thierryi
KOU	Herpestes_ichneumon
KOU	Ichneumia_albicauda
KOU	Ictonyx_striatus
KOU	Leptailurus_serval
KOU	Lutra_maculicollis
KOU	Lycaon_pictus
KOU	Mellivora_capensis
KOU	Mungos_mungo
KOU	Panthera_leo
KOU	Panthera_pardus
LACA	Canis_aureus
LACA	Caracal_caracal
LACA	Felis_silvestris
LACA	Genetta_genetta
LACA	Herpestes_ichneumon
LACA	Leptailurus_serval
LACA	Vulpes_vulpes
LACF	Acinonyx_jubatus
LACF	Canis_aureus
LACF	Caracal_caracal
LACF	Crocuta_crocuta
LACF	Felis_silvestris
LACF	Herpestes_ichneumon
LACF	Hyaena_hyaena
LACF	Ictonyx_libyca
LACF	Ictonyx_striatus
LACF	Leptailurus_serval
LACF	Mellivora_capensis
LACF	Mungos_mungo
LACF	Panthera_leo
LACF	Panthera_pardus
LACF	Vulpes_pallida
LACO	Canis_aureus
LACO	Caracal_caracal
LACO	Felis_silvestris
LACO	Genetta_genetta
LACO	Herpestes_ichneumon
LACO	Hyaena_hyaena
LACO	Lutra_lutra
LACO	Vulpes_vulpes
LACT	Canis_aureus
LACT	Caracal_caracal
LACT	Felis_silvestris
LACT	Herpestes_ichneumon
LACT	Lutra_lutra
LACT	Vulpes_vulpes
LCHIL	Aonyx_capensis
LCHIL	Atilax_paludinosus
LCHIL	Bdeogale_crassicauda
LCHIL	Canis_adustus
LCHIL	Caracal_caracal
LCHIL	Civettictis_civetta
LCHIL	Crocuta_crocuta
LCHIL	Felis_silvestris
LCHIL	Galerella_sanguinea
LCHIL	Genetta_angolensis
LCHIL	Genetta_genetta
LCHIL	Genetta_tigrina
LCHIL	Helogale_parvula
LCHIL	Herpestes_ichneumon
LCHIL	Ichneumia_albicauda
LCHIL	Ictonyx_striatus
LCHIL	Leptailurus_serval
LCHIL	Lutra_maculicollis
LCHIL	Lycaon_pictus
LCHIL	Mellivora_capensis
LCHIL	Mungos_mungo
LCHIL	Nandinia_binotata
LCHIL	Panthera_leo
LCHIL	Panthera_pardus
LCHIL	Paracynictis_selousi
LCHIL	Poecilogale_albinucha
LCHIL	Rhynchogale_melleri
LEF	Aonyx_congicus
LEF	Atilax_paludinosus
LEF	Bdeogale_nigripes
LEF	Civettictis_civetta
LEF	Crocuta_crocuta
LEF	Felis_silvestris
LEF	Genetta_servalina
LEF	Genetta_tigrina
LEF	Herpestes_ichneumon
LEF	Herpestes_naso
LEF	Hyaena_hyaena
LEF	Leptailurus_serval
LEF	Lutra_maculicollis
LEF	Mellivora_capensis
LEF	Mungos_mungo
LEF	Nandinia_binotata
LEF	Panthera_leo
LEF	Panthera_pardus
LEF	Poecilogale_albinucha
LEF	Poiana_richardsonii
LEF	Potamogale_velox
LEF	Profelis_aurata
LEN	Aonyx_capensis
LEN	Atilax_paludinosus
LEN	Bdeogale_crassicauda
LEN	Canis_adustus
LEN	Caracal_caracal
LEN	Civettictis_civetta
LEN	Crocuta_crocuta
LEN	Felis_silvestris
LEN	Galerella_sanguinea
LEN	Genetta_angolensis
LEN	Genetta_tigrina
LEN	Helogale_parvula
LEN	Herpestes_ichneumon
LEN	Ichneumia_albicauda
LEN	Ictonyx_striatus
LEN	Leptailurus_serval
LEN	Lutra_maculicollis
LEN	Lycaon_pictus
LEN	Mellivora_capensis
LEN	Mungos_mungo
LEN	Nandinia_binotata
LEN	Panthera_leo
LEN	Panthera_pardus
LEN	Paracynictis_selousi
LEN	Poecilogale_albinucha
LEN	Rhynchogale_melleri
LIN	Acinonyx_jubatus
LIN	Aonyx_capensis
LIN	Canis_adustus
LIN	Caracal_caracal
LIN	Civettictis_civetta
LIN	Crocuta_crocuta
LIN	Galerella_sanguinea
LIN	Genetta_tigrina
LIN	Lutra_maculicollis
LIN	Mungos_mungo
LIN	Panthera_leo
LIW	Aonyx_capensis
LIW	Crocuta_crocuta
LIW	Felis_silvestris
LIW	Galerella_sanguinea
LIW	Herpestes_ichneumon
LIW	Lutra_maculicollis
LIW	Lycaon_pictus
LIW	Mungos_mungo
LIW	Panthera_leo
LIW	Panthera_pardus
LMAG	Acinonyx_jubatus
LMAG	Caracal_caracal
LMAG	Civettictis_civetta
LMAG	Crocuta_crocuta
LMAG	Felis_silvestris
LMAG	Genetta_genetta
LMAG	Hyaena_hyaena
LMAG	Ictonyx_striatus
LMAG	Otocyon_megalotis
LMAG	Panthera_leo
LMAG	Panthera_pardus
LMAG	Proteles_cristatus
LMNY	Aonyx_capensis
LMNY	Atilax_paludinosus
LMNY	Canis_adustus
LMNY	Canis_mesomelas
LMNY	Civettictis_civetta
LMNY	Crocuta_crocuta
LMNY	Genetta_genetta
LMNY	Genetta_tigrina
LMNY	Helogale_parvula
LMNY	Ictonyx_striatus
LMNY	Mellivora_capensis
LMNY	Mungos_mungo
LMNY	Nandinia_binotata
LMNY	Otocyon_megalotis
LMNY	Panthera_leo
LMNY	Panthera_pardus
LNAK	Acinonyx_jubatus
LNAK	Atilax_paludinosus
LNAK	Canis_adustus
LNAK	Canis_mesomelas
LNAK	Civettictis_civetta
LNAK	Crocuta_crocuta
LNAK	Felis_silvestris
LNAK	Galerella_sanguinea
LNAK	Genetta_genetta
LNAK	Genetta_tigrina
LNAK	Helogale_parvula
LNAK	Ichneumia_albicauda
LNAK	Ictonyx_striatus
LNAK	Leptailurus_serval
LNAK	Mellivora_capensis
LNAK	Otocyon_megalotis
LNAK	Panthera_pardus
LNHG	Aonyx_capensis
LNHG	Atilax_paludinosus
LNHG	Canis_adustus
LNHG	Canis_mesomelas
LNHG	Civettictis_civetta
LNHG	Genetta_genetta
LNHG	Genetta_tigrina
LNHG	Ichneumia_albicauda
LNHG	Ictonyx_striatus
LNHG	Leptailurus_serval
LNHG	Otocyon_megalotis
LNHG	Proteles_cristatus
LOP	Aonyx_congicus
LOP	Atilax_paludinosus
LOP	Bdeogale_nigripes
LOP	Civettictis_civetta
LOP	Genetta_servalina
LOP	Genetta_tigrina
LOP	Herpestes_naso
LOP	Lutra_maculicollis
LOP	Mellivora_capensis
LOP	Nandinia_binotata
LOP	Panthera_pardus
LOP	Poiana_richardsonii
LOP	Potamogale_velox
LOP	Profelis_aurata
LTCR	Aonyx_congicus
LTCR	Atilax_paludinosus
LTCR	Bdeogale_nigripes
LTCR	Civettictis_civetta
LTCR	Genetta_servalina
LTCR	Genetta_tigrina
LTCR	Herpestes_naso
LTCR	Lutra_maculicollis
LTCR	Mellivora_capensis
LTCR	Nandinia_binotata
LTCR	Panthera_pardus
LTCR	Poiana_richardsonii
LTCR	Potamogale_velox
LTCR	Profelis_aurata
LUA	Acinonyx_jubatus
LUA	Aonyx_capensis
LUA	Atilax_paludinosus
LUA	Canis_adustus
LUA	Caracal_caracal
LUA	Civettictis_civetta
LUA	Crocuta_crocuta
LUA	Felis_silvestris
LUA	Galerella_sanguinea
LUA	Genetta_angolensis
LUA	Genetta_genetta
LUA	Genetta_tigrina
LUA	Helogale_parvula
LUA	Herpestes_ichneumon
LUA	Ichneumia_albicauda
LUA	Ictonyx_striatus
LUA	Leptailurus_serval
LUA	Lutra_maculicollis
LUA	Lycaon_pictus
LUA	Mellivora_capensis
LUA	Mungos_mungo
LUA	Nandinia_binotata
LUA	Panthera_leo
LUA	Panthera_pardus
LUA	Paracynictis_selousi
LUA	Potamogale_velox
MAD	Acinonyx_jubatus
MAD	Aonyx_capensis
MAD	Atilax_paludinosus
MAD	Canis_adustus
MAD	Caracal_caracal
MAD	Civettictis_civetta
MAD	Crocuta_crocuta
MAD	Felis_silvestris
MAD	Galerella_sanguinea
MAD	Genetta_genetta
MAD	Genetta_thierryi
MAD	Herpestes_ichneumon
MAD	Ichneumia_albicauda
MAD	Ictonyx_striatus
MAD	Leptailurus_serval
MAD	Lutra_maculicollis
MAD	Lycaon_pictus
MAD	Mellivora_capensis
MAD	Mungos_mungo
MAD	Panthera_leo
MAD	Panthera_pardus
MAGO	Acinonyx_jubatus
MAGO	Canis_aureus
MAGO	Canis_mesomelas
MAGO	Caracal_caracal
MAGO	Civettictis_civetta
MAGO	Crocuta_crocuta
MAGO	Felis_silvestris
MAGO	Galerella_sanguinea
MAGO	Genetta_genetta
MAGO	Herpestes_ichneumon
MAGO	Hyaena_hyaena
MAGO	Ichneumia_albicauda
MAGO	Ictonyx_striatus
MAGO	Leptailurus_serval
MAGO	Lycaon_pictus
MAGO	Mellivora_capensis
MAGO	Otocyon_megalotis
MAGO	Panthera_leo
MAGO	Panthera_pardus
MAH	Aonyx_capensis
MAH	Bdeogale_crassicauda
MAH	Canis_adustus
MAH	Civettictis_civetta
MAH	Cricetomys_gambianus
MAH	Crocuta_crocuta
MAH	Felis_silvestris
MAH	Galerella_sanguinea
MAH	Genetta_genetta
MAH	Genetta_tigrina
MAH	Helogale_parvula
MAH	Ichneumia_albicauda
MAH	Ictonyx_striatus
MAH	Leptailurus_serval
MAH	Lutra_maculicollis
MAH	Lycaon_pictus
MAH	Mellivora_capensis
MAH	Mungos_mungo
MAH	Panthera_leo
MAH	Panthera_pardus
MAJ	Aonyx_capensis
MAJ	Atilax_paludinosus
MAJ	Bdeogale_crassicauda
MAJ	Canis_adustus
MAJ	Caracal_caracal
MAJ	Civettictis_civetta
MAJ	Crocuta_crocuta
MAJ	Felis_silvestris
MAJ	Galerella_sanguinea
MAJ	Genetta_angolensis
MAJ	Genetta_tigrina
MAJ	Helogale_parvula
MAJ	Herpestes_ichneumon
MAJ	Ichneumia_albicauda
MAJ	Ictonyx_striatus
MAJ	Leptailurus_serval
MAJ	Lutra_maculicollis
MAJ	Lycaon_pictus
MAJ	Mellivora_capensis
MAJ	Mungos_mungo
MAJ	Nandinia_binotata
MAJ	Panthera_leo
MAJ	Panthera_pardus
MAJ	Paracynictis_selousi
MAJ	Poecilogale_albinucha
MAJ	Rhynchogale_melleri
MAK	Civettictis_civetta
MAK	Genetta_servalina
MAK	Genetta_tigrina
MAK	Genetta_victoriae
MAK	Nandinia_binotata
MAK	Panthera_pardus
MAK	Profelis_aurata
MAM	Acinonyx_jubatus
MAM	Atilax_paludinosus
MAM	Canis_adustus
MAM	Canis_mesomelas
MAM	Caracal_caracal
MAM	Civettictis_civetta
MAM	Crocuta_crocuta
MAM	Felis_silvestris
MAM	Galerella_sanguinea
MAM	Genetta_genetta
MAM	Genetta_tigrina
MAM	Helogale_parvula
MAM	Herpestes_ichneumon
MAM	Ichneumia_albicauda
MAM	Ictonyx_striatus
MAM	Leptailurus_serval
MAM	Lutra_maculicollis
MAM	Lycaon_pictus
MAM	Mellivora_capensis
MAM	Mungos_mungo
MAM	Otocyon_megalotis
MAM	Panthera_leo
MAM	Panthera_pardus
MAM	Paracynictis_selousi
MAM	Proteles_cristatus
MAN	Acinonyx_jubatus
MAN	Aonyx_capensis
MAN	Bdeogale_crassicauda
MAN	Canis_adustus
MAN	Caracal_caracal
MAN	Civettictis_civetta
MAN	Crocuta_crocuta
MAN	Felis_silvestris
MAN	Galerella_sanguinea
MAN	Genetta_tigrina
MAN	Helogale_parvula
MAN	Herpestes_ichneumon
MAN	Ichneumia_albicauda
MAN	Ictonyx_striatus
MAN	Leptailurus_serval
MAN	Lutra_maculicollis
MAN	Lycaon_pictus
MAN	Mellivora_capensis
MAN	Mungos_mungo
MAN	Panthera_leo
MAN	Panthera_pardus
MAN	Paracynictis_selousi
MAN	Poecilogale_albinucha
MAN	Proteles_cristatus
MAN	Rhynchogale_melleri
MAND	Acinonyx_jubatus
MAND	Aonyx_capensis
MAND	Atilax_paludinosus
MAND	Canis_adustus
MAND	Canis_aureus
MAND	Caracal_caracal
MAND	Civettictis_civetta
MAND	Crocuta_crocuta
MAND	Felis_silvestris
MAND	Galerella_sanguinea
MAND	Genetta_genetta
MAND	Genetta_tigrina
MAND	Herpestes_ichneumon
MAND	Hyaena_hyaena
MAND	Ichneumia_albicauda
MAND	Ictonyx_striatus
MAND	Leptailurus_serval
MAND	Lutra_maculicollis
MAND	Lycaon_pictus
MAND	Mellivora_capensis
MAND	Mungos_mungo
MAND	Panthera_leo
MAND	Panthera_pardus
MAP	Aonyx_capensis
MAP	Atilax_paludinosus
MAP	Canis_adustus
MAP	Canis_mesomelas
MAP	Caracal_caracal
MAP	Civettictis_civetta
MAP	Crocuta_crocuta
MAP	Felis_silvestris
MAP	Galerella_sanguinea
MAP	Genetta_tigrina
MAP	Helogale_parvula
MAP	Herpestes_ichneumon
MAP	Ichneumia_albicauda
MAP	Ictonyx_striatus
MAP	Leptailurus_serval
MAP	Lutra_maculicollis
MAP	Lycaon_pictus
MAP	Mellivora_capensis
MAP	Mungos_mungo
MAP	Panthera_pardus
MAP	Paracynictis_selousi
MAP	Poecilogale_albinucha
MAP	Proteles_cristatus
MAP	Rhynchogale_melleri
MARE	Aonyx_capensis
MARE	Atilax_paludinosus
MARE	Canis_adustus
MARE	Caracal_caracal
MARE	Civettictis_civetta
MARE	Crocuta_crocuta
MARE	Felis_silvestris
MARE	Galerella_sanguinea
MARE	Genetta_genetta
MARE	Genetta_maculata
MARE	Genetta_thierryi
MARE	Herpestes_ichneumon
MARE	Ichneumia_albicauda
MARE	Ictonyx_striatus
MARE	Leptailurus_serval
MARE	Lutra_maculicollis
MARE	Lycaon_pictus
MARE	Mellivora_capensis
MARE	Mungos_mungo
MARE	Panthera_leo
MARE	Panthera_pardus
MARO	Aonyx_capensis
MARO	Atilax_paludinosus
MARO	Bdeogale_crassicauda
MARO	Canis_adustus
MARO	Caracal_caracal
MARO	Civettictis_civetta
MARO	Crocuta_crocuta
MARO	Felis_silvestris
MARO	Galerella_sanguinea
MARO	Genetta_tigrina
MARO	Helogale_parvula
MARO	Herpestes_ichneumon
MARO	Ichneumia_albicauda
MARO	Ictonyx_striatus
MARO	Leptailurus_serval
MARO	Lutra_maculicollis
MARO	Lycaon_pictus
MARO	Mellivora_capensis
MARO	Mungos_mungo
MARO	Panthera_leo
MARO	Panthera_pardus
MARS	Acinonyx_jubatus
MARS	Canis_adustus
MARS	Canis_aureus
MARS	Canis_mesomelas
MARS	Caracal_caracal
MARS	Civettictis_civetta
MARS	Crocuta_crocuta
MARS	Felis_silvestris
MARS	Galerella_sanguinea
MARS	Genetta_genetta
MARS	Genetta_tigrina
MARS	Helogale_parvula
MARS	Herpestes_ichneumon
MARS	Hyaena_hyaena
MARS	Ichneumia_albicauda
MARS	Ictonyx_striatus
MARS	Leptailurus_serval
MARS	Lycaon_pictus
MARS	Mellivora_capensis
[truncated: 1,577 more rows]

## Sheet: Primate Comm Species Comp
SiteCode	Species
ABER	Cercopithecus_mitis
ABER	Chlorocebus_aethiops
ABER	Colobus_guereza
ABER	Otolemur_crassicaudatus
ABER	Papio_anubis
ABTL	Chlorocebus_aethiops
ABTL	Erythrocebus_patas
ABTL	Galago_senegalensis
ABTL	Papio_anubis
AKA	Cercopithecus_ascanius
AKA	Cercopithecus_mitis
AKA	Chlorocebus_aethiops
AKA	Colobus_angolensis
AKA	Colobus_guereza
AKA	Galago_moholi
AKA	Galago_senegalensis
AKA	Galagoides_demidoff
AKA	Galagoides_thomasi
AKA	Otolemur_crassicaudatus
AKA	Pan_troglodytes
AKA	Papio_anubis
AKA	Perodicticus_potto
AKA	Piliocolobus_badius
ANG	Chlorocebus_aethiops
ANG	Galago_moholi
ANG	Otolemur_crassicaudatus
ANG	Papio_ursinus
APFR	Chlorocebus_aethiops
APFR	Erythrocebus_patas
APFR	Galago_senegalensis
APFR	Papio_anubis
ARU	Cercopithecus_mitis
ARU	Chlorocebus_aethiops
ARU	Colobus_polykomos
ARU	Galago_senegalensis
ARU	Otolemur_crassicaudatus
ARU	Papio_anubis
ATFR	Chlorocebus_aethiops
ATFR	Erythrocebus_patas
ATFR	Galago_senegalensis
ATFR	Papio_anubis
AWA	Chlorocebus_aethiops
AWA	Colobus_guereza
AWA	Papio_anubis
AWA	Papio_hamadryas
BAD	Chlorocebus_aethiops
BAD	Colobus_polykomos
BAD	Erythrocebus_patas
BAD	Galago_senegalensis
BAD	Pan_troglodytes
BAD	Papio_papio
BAD	Piliocolobus_badius
BAN	Cercopithecus_mitis
BAN	Chlorocebus_aethiops
BAN	Galago_moholi
BAN	Otolemur_crassicaudatus
BAN	Papio_cynocephalus
BASA	Chlorocebus_aethiops
BASA	Colobus_guereza
BASA	Erythrocebus_patas
BASA	Galago_moholi
BASA	Papio_anubis
BAZ	Chlorocebus_aethiops
BAZ	Galago_moholi
BAZ	Galago_zanzibaricus
BAZ	Otolemur_crassicaudatus
BAZ	Papio_ursinus
BBN	Arctocebus_aureus
BBN	Cercocebus_galeritus
BBN	Cercopithecus_cephus
BBN	Cercopithecus_neglectus
BBN	Cercopithecus_nictitans
BBN	Cercopithecus_pogonias
BBN	Colobus_guereza
BBN	Colobus_satanas
BBN	Euoticus_elegantulus
BBN	Galagoides_demidoff
BBN	Galagoides_thomasi
BBN	Gorilla_gorilla
BBN	Lophocebus_albigena
BBN	Miopithecus_talapoin
BBN	Pan_troglodytes
BBN	Perodicticus_potto
BBN	Piliocolobus_badius
BEN	Chlorocebus_aethiops
BEN	Colobus_guereza
BEN	Erythrocebus_patas
BEN	Galago_senegalensis
BEN	Papio_anubis
BF	Cercopithecus_ascanius
BF	Cercopithecus_mitis
BF	Chlorocebus_aethiops
BF	Colobus_angolensis
BF	Galago_moholi
BF	Galago_senegalensis
BF	Otolemur_crassicaudatus
BF	Pan_troglodytes
BF	Papio_anubis
BF	Perodicticus_potto
BF	Piliocolobus_badius
BHINE	Chlorocebus_aethiops
BHINE	Galago_moholi
BHINE	Galago_zanzibaricus
BHINE	Otolemur_crassicaudatus
BHINE	Papio_ursinus
BIK	Chlorocebus_aethiops
BIK	Galago_moholi
BIK	Otolemur_crassicaudatus
BIK	Papio_ursinus
BIN	Chlorocebus_aethiops
BIN	Colobus_guereza
BIN	Erythrocebus_patas
BIN	Galago_senegalensis
BIN	Papio_anubis
BON	Chlorocebus_aethiops
BON	Erythrocebus_patas
BON	Galago_senegalensis
BON	Papio_anubis
BUF	Chlorocebus_aethiops
BUF	Galago_moholi
BUF	Otolemur_crassicaudatus
BUF	Papio_cynocephalus
CLB	Chlorocebus_aethiops
CLB	Erythrocebus_patas
CLB	Galago_senegalensis
CLB	Papio_anubis
CMA	Arctocebus_aureus
CMA	Cercocebus_torquatus
CMA	Cercopithecus_cephus
CMA	Cercopithecus_neglectus
CMA	Cercopithecus_nictitans
CMA	Cercopithecus_pogonias
CMA	Colobus_satanas
CMA	Euoticus_elegantulus
CMA	Galago_alleni
CMA	Galagoides_demidoff
CMA	Galagoides_thomasi
CMA	Gorilla_gorilla
CMA	Lophocebus_albigena
CMA	Mandrillus_sphinx
CMA	Miopithecus_talapoin
CMA	Pan_troglodytes
CMA	Perodicticus_potto
COM	Cercocebus_torquatus
COM	Cercopithecus_campbelli
COM	Cercopithecus_diana
COM	Cercopithecus_nictitans
COM	Cercopithecus_petaurista
COM	Chlorocebus_aethiops
COM	Colobus_vellerosus
COM	Erythrocebus_patas
COM	Galago_senegalensis
COM	Galagoides_demidoff
COM	Pan_troglodytes
COM	Papio_anubis
COM	Perodicticus_potto
COM	Procolobus_verus
CON	Arctocebus_aureus
CON	Cercopithecus_cephus
CON	Cercopithecus_nictitans
CON	Cercopithecus_pogonias
CON	Chlorocebus_aethiops
CON	Euoticus_elegantulus
CON	Galago_alleni
CON	Galagoides_demidoff
CON	Galagoides_thomasi
CON	Gorilla_gorilla
CON	Mandrillus_sphinx
CON	Pan_troglodytes
CON	Perodicticus_potto
CONG	Allenopithecus_nigroviridis
CONG	Cercocebus_galeritus
CONG	Cercopithecus_ascanius
CONG	Cercopithecus_mona
CONG	Cercopithecus_neglectus
CONG	Cercopithecus_nictitans
CONG	Chlorocebus_aethiops
CONG	Colobus_polykomos
CONG	Galagoides_demidoff
CONG	Gorilla_gorilla
CONG	Lophocebus_albigena
CONG	Lophocebus_aterrimus
CONG	Pan_paniscus
CONG	Pan_troglodytes
CONG	Perodicticus_potto
CONG	Piliocolobus_badius
CROS	Arctocebus_calabarensis
CROS	Cercocebus_torquatus
CROS	Cercopithecus_erythrotis
CROS	Cercopithecus_mona
CROS	Cercopithecus_nictitans
CROS	Euoticus_elegantulus
CROS	Galago_alleni
CROS	Galagoides_demidoff
CROS	Gorilla_gorilla
CROS	Lophocebus_albigena
CROS	Mandrillus_leucophaeus
CROS	Pan_troglodytes
CROS	Perodicticus_potto
DEUX	Chlorocebus_aethiops
DEUX	Erythrocebus_patas
DEUX	Galago_senegalensis
DEUX	Papio_anubis
ENIG	Cercocebus_torquatus
ENIG	Cercopithecus_erythrogaster
ENIG	Cercopithecus_mona
ENIG	Cercopithecus_nictitans
ENIG	Galagoides_demidoff
ENIG	Pan_troglodytes
ENIG	Perodicticus_potto
GAM	Cercopithecus_mitis
GAM	Chlorocebus_aethiops
GAM	Colobus_guereza
GAM	Erythrocebus_patas
GAM	Papio_anubis
GAR	Cercocebus_galeritus
GAR	Cercopithecus_ascanius
GAR	Cercopithecus_neglectus
GAR	Chlorocebus_aethiops
GAR	Colobus_guereza
GAR	Erythrocebus_patas
GAR	Galago_senegalensis
GAR	Galagoides_demidoff
GAR	Lophocebus_albigena
GAR	Pan_troglodytes
GAR	Papio_cynocephalus
GAR	Piliocolobus_badius
GHO	Cercopithecus_mitis
GHO	Chlorocebus_aethiops
GHO	Galago_moholi
GHO	Otolemur_crassicaudatus
GHO	Papio_ursinus
GILE	Cercopithecus_mitis
GILE	Chlorocebus_aethiops
GILE	Galago_moholi
GILE	Galago_zanzibaricus
GILE	Otolemur_crassicaudatus
GILE	Papio_cynocephalus
GISH	Cercopithecus_ascanius
GISH	Cercopithecus_hamlyni
GISH	Cercopithecus_lhoesti
GISH	Cercopithecus_mitis
GISH	Chlorocebus_aethiops
GISH	Colobus_angolensis
GISH	Colobus_guereza
GISH	Galago_moholi
GISH	Galago_senegalensis
GISH	Galagoides_demidoff
GISH	Galagoides_thomasi
GISH	Gorilla_gorilla
GISH	Lophocebus_albigena
GISH	Otolemur_crassicaudatus
GISH	Pan_troglodytes
GISH	Papio_anubis
GISH	Perodicticus_potto
GISH	Piliocolobus_badius
GOMB	Cercopithecus_ascanius
GOMB	Cercopithecus_mitis
GOMB	Chlorocebus_aethiops
GOMB	Colobus_angolensis
GOMB	Euoticus_elegantulus
GOMB	Galago_moholi
GOMB	Galago_senegalensis
GOMB	Otolemur_crassicaudatus
GOMB	Papio_anubis
GOMB	Papio_anubis
GOMB	Perodicticus_potto
GOMB	Piliocolobus_rufomitratus
GOR	Cercopithecus_mitis
GOR	Chlorocebus_aethiops
GOR	Galago_moholi
GOR	Galago_zanzibaricus
GOR	Otolemur_crassicaudatus
GOR	Papio_ursinus
GUS	Cercopithecus_mona
GUS	Cercopithecus_nictitans
GUS	Chlorocebus_aethiops
GUS	Colobus_vellerosus
GUS	Erythrocebus_patas
GUS	Galago_senegalensis
GUS	Papio_anubis
GUS	Procolobus_verus
HLU	Cercopithecus_mitis
HLU	Chlorocebus_aethiops
HLU	Otolemur_crassicaudatus
HLU	Papio_ursinus
HWA	Chlorocebus_aethiops
HWA	Galago_moholi
HWA	Otolemur_crassicaudatus
HWA	Papio_ursinus
ILES	Cercocebus_torquatus
ILES	Cercopithecus_campbelli
ILES	Cercopithecus_petaurista
ILES	Chlorocebus_aethiops
ILES	Colobus_polykomos
ILES	Erythrocebus_patas
ILES	Galago_senegalensis
ILES	Pan_troglodytes
ILES	Papio_papio
ILES	Perodicticus_potto
ILES	Piliocolobus_badius
ITG	Chlorocebus_aethiops
ITG	Colobus_angolensis
ITG	Otolemur_crassicaudatus
ITG	Papio_cynocephalus
KAB	Chlorocebus_aethiops
KAB	Erythrocebus_patas
KAB	Galago_moholi
KAB	Papio_anubis
KAK	Cercopithecus_ascanius
KAK	Cercopithecus_mitis
KAK	Colobus_guereza
KAK	Papio_anubis
KAM	Chlorocebus_aethiops
KAM	Colobus_angolensis
KAM	Galago_moholi
KAM	Otolemur_crassicaudatus
KAM	Papio_cynocephalus
KANG	Cercopithecus_ascanius
KANG	Chlorocebus_aethiops
KANG	Colobus_angolensis
KANG	Galago_moholi
KANG	Galagoides_thomasi
KANG	Otolemur_crassicaudatus
KANG	Papio_cynocephalus
KAS	Cercopithecus_mitis
KAS	Chlorocebus_aethiops
KAS	Galago_moholi
KAS	Galago_zanzibaricus
KAS	Otolemur_crassicaudatus
KAS	Papio_cynocephalus
KBIR	Cercopithecus_ascanius
KBIR	Cercopithecus_lhoesti
KBIR	Cercopithecus_mitis
KBIR	Chlorocebus_aethiops
KBIR	Colobus_angolensis
KBIR	Galago_moholi
KBIR	Galago_senegalensis
KBIR	Galagoides_demidoff
KBIR	Galagoides_thomasi
KBIR	Lophocebus_albigena
KBIR	Otolemur_crassicaudatus
KBIR	Pan_troglodytes
KBIR	Papio_anubis
KBIR	Perodicticus_potto
KBIR	Piliocolobus_badius
KFAL	Cercopithecus_ascanius
KFAL	Chlorocebus_aethiops
KFAL	Colobus_polykomos
KFAL	Erythrocebus_patas
KFAL	Pan_troglodytes
KFAL	Papio_anubis
KFNP	Cercopithecus_mitis
KFNP	Chlorocebus_aethiops
KFNP	Galago_moholi
KFNP	Otolemur_crassicaudatus
KFNP	Papio_ursinus
KIB	Cercopithecus_ascanius
KIB	Cercopithecus_lhoesti
KIB	Cercopithecus_mitis
KIB	Cercopithecus_neglectus
KIB	Chlorocebus_aethiops
KIB	Colobus_angolensis
KIB	Colobus_guereza
KIB	Euoticus_elegantulus
KIB	Galago_senegalensis
KIB	Galagoides_demidoff
KIB	Galagoides_thomasi
KIB	Lophocebus_albigena
KIB	Papio_anubis
KIB	Papio_anubis
KIB	Perodicticus_potto
KIB	Piliocolobus_badius
KIB	Piliocolobus_rufomitratus
KID	Chlorocebus_aethiops
KID	Erythrocebus_patas
KID	Galago_senegalensis
KID	Papio_anubis
KILI	Cercopithecus_mitis
KILI	Colobus_guereza
KILI	Galago_senegalensis
KILI	Otolemur_crassicaudatus
KIS	Cercopithecus_mitis
KIS	Chlorocebus_aethiops
KIS	Galago_moholi
KIS	Galagoides_thomasi
KIS	Miopithecus_talapoin
KIS	Otolemur_crassicaudatus
KIS	Papio_cynocephalus
KIZ	Chlorocebus_aethiops
KIZ	Galago_moholi
KIZ	Galago_senegalensis
KIZ	Galago_zanzibaricus
KIZ	Otolemur_crassicaudatus
KIZ	Otolemur_garnettii
KIZ	Papio_cynocephalus
KNYS	Cercopithecus_mitis
KNYS	Chlorocebus_aethiops
KNYS	Galago_moholi
KNYS	Otolemur_crassicaudatus
KNYS	Papio_ursinus
KOR	Arctocebus_calabarensis
KOR	Cercocebus_torquatus
KOR	Cercopithecus_erythrotis
KOR	Cercopithecus_mona
KOR	Cercopithecus_nictitans
KOR	Cercopithecus_pogonias
KOR	Cercopithecus_preussi
KOR	Colobus_vellerosus
KOR	Euoticus_pallidus
KOR	Galago_alleni
KOR	Galagoides_demidoff
KOR	Galagoides_thomasi
KOR	Lophocebus_albigena
KOR	Mandrillus_leucophaeus
KOR	Pan_troglodytes
KOR	Perodicticus_potto
KOR	Piliocolobus_badius
KOU	Chlorocebus_aethiops
KOU	Erythrocebus_patas
KOU	Galago_senegalensis
KOU	Papio_anubis
LACF	Chlorocebus_aethiops
LACF	Erythrocebus_patas
LACF	Galago_senegalensis
LACF	Papio_anubis
LCHIL	Cercopithecus_mitis
LCHIL	Chlorocebus_aethiops
LCHIL	Galago_moholi
LCHIL	Galago_zanzibaricus
LCHIL	Otolemur_crassicaudatus
LCHIL	Papio_cynocephalus
LEF	Arctocebus_aureus
LEF	Cercopithecus_cephus
LEF	Cercopithecus_nictitans
LEF	Cercopithecus_pogonias
LEF	Euoticus_elegantulus
LEF	Galagoides_demidoff
LEF	Galagoides_thomasi
LEF	Lophocebus_albigena
LEF	Perodicticus_potto
LEF	Piliocolobus_badius
LEN	Cercopithecus_mitis
LEN	Chlorocebus_aethiops
LEN	Galago_moholi
LEN	Galago_zanzibaricus
LEN	Otolemur_crassicaudatus
LEN	Papio_cynocephalus
LMNY	Cercopithecus_mitis
LMNY	Chlorocebus_aethiops
LMNY	Galago_senegalensis
LMNY	Lophocebus_albigena
LMNY	Otolemur_crassicaudatus
LMNY	Papio_anubis
LNAK	Cercopithecus_mitis
LNAK	Chlorocebus_aethiops
LNAK	Colobus_polykomos
LNAK	Galago_senegalensis
LNAK	Papio_anubis
LOP	Arctocebus_aureus
LOP	Cercocebus_torquatus
LOP	Cercopithecus_cephus
LOP	Cercopithecus_nictitans
LOP	Cercopithecus_pogonias
LOP	Cercopithecus_solatus
LOP	Colobus_satanas
LOP	Euoticus_elegantulus
LOP	Galago_alleni
LOP	Galagoides_demidoff
LOP	Galagoides_thomasi
LOP	Gorilla_gorilla
LOP	Lophocebus_albigena
LOP	Mandrillus_sphinx
LOP	Miopithecus_talapoin
LOP	Pan_troglodytes
LOP	Perodicticus_potto
LTCR	Allenopithecus_nigroviridis
LTCR	Arctocebus_aureus
LTCR	Cercocebus_galeritus
LTCR	Cercopithecus_ascanius
LTCR	Cercopithecus_cephus
LTCR	Cercopithecus_neglectus
LTCR	Cercopithecus_nictitans
LTCR	Cercopithecus_pogonias
LTCR	Colobus_guereza
LTCR	Euoticus_elegantulus
LTCR	Galagoides_demidoff
LTCR	Galagoides_thomasi
LTCR	Gorilla_gorilla
LTCR	Lophocebus_albigena
LTCR	Pan_troglodytes
LTCR	Perodicticus_potto
LTCR	Piliocolobus_badius
LUA	Cercopithecus_ascanius
LUA	Cercopithecus_mitis
LUA	Chlorocebus_aethiops
LUA	Galago_moholi
LUA	Galagoides_thomasi
LUA	Otolemur_crassicaudatus
LUA	Papio_cynocephalus
MAD	Chlorocebus_aethiops
MAD	Erythrocebus_patas
MAD	Galago_senegalensis
MAD	Papio_anubis
MAGO	Cercopithecus_mitis
MAGO	Cercopithecus_neglectus
MAGO	Chlorocebus_aethiops
MAGO	Colobus_guereza
MAGO	Erythrocebus_patas
MAGO	Papio_anubis
MAH	Cercopithecus_ascanius
MAH	Cercopithecus_mitis
MAH	Chlorocebus_aethiops
MAH	Colobus_angolensis
MAH	Galago_moholi
MAH	Galagoides_demidoff
MAH	Otolemur_crassicaudatus
MAH	Pan_troglodytes
MAH	Papio_cynocephalus
MAH	Piliocolobus_badius
MAJ	Cercopithecus_mitis
MAJ	Chlorocebus_aethiops
MAJ	Galago_moholi
MAJ	Galago_zanzibaricus
MAJ	Otolemur_crassicaudatus
MAJ	Papio_cynocephalus
MAK	Arctocebus_calabarensis
MAK	Cercocebus_galeritus
MAK	Cercopithecus_cephus
MAK	Cercopithecus_neglectus
MAK	Cercopithecus_nictitans
MAK	Cercopithecus_pogonias
MAK	Colobus_guereza
MAK	Euoticus_elegantulus
MAK	Galago_alleni
MAK	Galagoides_demidoff
MAK	Gorilla_gorilla
MAK	Lophocebus_albigena
MAK	Mandrillus_sphinx
MAK	Miopithecus_talapoin
MAK	Pan_troglodytes
MAK	Perodicticus_potto
MAN	Cercopithecus_mitis
MAN	Chlorocebus_aethiops
MAN	Galago_moholi
MAN	Otolemur_crassicaudatus
MAN	Papio_ursinus
MAND	Chlorocebus_aethiops
MAND	Colobus_guereza
MAND	Erythrocebus_patas
MAND	Galago_senegalensis
MAND	Papio_anubis
MAP	Cercopithecus_mitis
MAP	Chlorocebus_aethiops
MAP	Otolemur_crassicaudatus
MAP	Papio_ursinus
MARE	Chlorocebus_aethiops
MARE	Erythrocebus_patas
MARE	Galago_moholi
MARE	Papio_anubis
MARO	Cercopithecus_mitis
MARO	Chlorocebus_aethiops
MARO	Galago_moholi
MARO	Galago_zanzibaricus
MARO	Otolemur_crassicaudatus
MARO	Papio_cynocephalus
MARS	Cercopithecus_erythrotis
MARS	Chlorocebus_aethiops
MARS	Colobus_polykomos
MARS	Erythrocebus_patas
MARS	Papio_anubis
MASF	Cercocebus_torquatus
MASF	Cercopithecus_campbelli
MASF	Cercopithecus_nictitans
MASF	Cercopithecus_petaurista
MASF	Chlorocebus_aethiops
MASF	Colobus_polykomos
MASF	Galago_senegalensis
MASF	Galagoides_demidoff
MASF	Galagoides_thomasi
MASF	Pan_troglodytes
MASF	Papio_anubis
MASF	Perodicticus_potto
MASF	Piliocolobus_badius
MASF	Procolobus_verus
MASM	Cercopithecus_mitis
MASM	Cercopithecus_nictitans
MASM	Chlorocebus_aethiops
MASM	Colobus_polykomos
MASM	Erythrocebus_patas
MASM	Galago_senegalensis
MASM	Otolemur_crassicaudatus
MASM	Papio_anubis
MATO	Chlorocebus_aethiops
MATO	Galago_moholi
MATO	Otolemur_crassicaudatus
MATO	Papio_ursinus
MAV	Chlorocebus_aethiops
MAV	Galago_moholi
MAV	Otolemur_crassicaudatus
MAV	Papio_ursinus
MED	Cercopithecus_mona
MED	Cercopithecus_nictitans
MED	Cercopithecus_pogonias
MED	Chlorocebus_aethiops
MED	Colobus_guereza
MED	Euoticus_pallidus
MED	Galago_senegalensis
MED	Galagoides_demidoff
MED	Galagoides_thomasi
MED	Papio_anubis
MED	Perodicticus_potto
MER	Cercopithecus_erythrotis
MER	Chlorocebus_aethiops
MER	Erythrocebus_patas
MER	Galago_senegalensis
MER	Otolemur_crassicaudatus
MER	Papio_anubis
MGSF	Cercocebus_galeritus
MGSF	Cercopithecus_neglectus
MGSF	Cercopithecus_nictitans
MGSF	Cercopithecus_pogonias
MGSF	Chlorocebus_aethiops
MGSF	Colobus_guereza
MGSF	Erythrocebus_patas
MGSF	Galago_senegalensis
MGSF	Papio_anubis
MHA	Arctocebus_calabarensis
MHA	Cercocebus_galeritus
MHA	Cercopithecus_cephus
MHA	Cercopithecus_neglectus
MHA	Cercopithecus_nictitans
MHA	Cercopithecus_pogonias
MHA	Colobus_guereza
MHA	Euoticus_elegantulus
MHA	Galagoides_demidoff
MHA	Gorilla_gorilla
MHA	Lophocebus_albigena
MHA	Miopithecus_talapoin
MHA	Pan_troglodytes
MHA	Piliocolobus_badius
MNDL	Chlorocebus_aethiops
MNDL	Erythrocebus_patas
MNDL	Galago_senegalensis
MNDL	Papio_anubis
MNIM	Cercocebus_torquatus
MNIM	Cercopithecus_campbelli
MNIM	Cercopithecus_nictitans
MNIM	Cercopithecus_petaurista
MNIM	Chlorocebus_aethiops
MNIM	Colobus_polykomos
MNIM	Galagoides_demidoff
MNIM	Galagoides_thomasi
MNIM	Pan_troglodytes
MNIM	Perodicticus_potto
MNIM	Procolobus_verus
MTAS	Chlorocebus_aethiops
MTAS	Colobus_polykomos
MTAS	Erythrocebus_patas
MTAS	Galago_moholi
MTAS	Pan_troglodytes
MTAS	Papio_cynocephalus
MTAS	Piliocolobus_badius
MTE	Cercopithecus_erythrotis
MTE	Cercopithecus_mona
MTE	Colobus_polykomos
MTE	Papio_anubis
MTFO	Arctocebus_aureus
MTFO	Cercopithecus_cephus
MTFO	Cercopithecus_nictitans
MTFO	Cercopithecus_pogonias
MTFO	Euoticus_elegantulus
MTFO	Galagoides_demidoff
MTFO	Galagoides_thomasi
MTFO	Gorilla_gorilla
MTFO	Miopithecus_talapoin
MTFO	Pan_troglodytes
MTFO	Perodicticus_potto
MUPA	Chlorocebus_aethiops
MUPA	Galago_moholi
MUPA	Otolemur_crassicaudatus
MUPA	Papio_ursinus
MUSH	Chlorocebus_aethiops
MUSH	Galago_moholi
MUSH	Otolemur_crassicaudatus
MUSH	Papio_ursinus
MWA	Cercopithecus_mitis
MWA	Chlorocebus_aethiops
MWA	Colobus_angolensis
MWA	Galago_moholi
MWA	Otolemur_crassicaudatus
MWA	Pan_troglodytes
MWA	Papio_cynocephalus
MWAB	Cercopithecus_mitis
MWAB	Chlorocebus_aethiops
MWAB	Galago_moholi
MWAB	Galago_zanzibaricus
MWAB	Otolemur_crassicaudatus
MWAB	Papio_cynocephalus
NAI	Cercopithecus_erythrotis
NAI	Chlorocebus_aethiops
NAI	Colobus_polykomos
NAI	Galago_senegalensis
NAI	Otolemur_crassicaudatus
NAT	Cercopithecus_mitis
NAT	Chlorocebus_aethiops
NAT	Galago_moholi
NAT	Otolemur_crassicaudatus
NAT	Papio_ursinus
NGO	Arctocebus_aureus
NGO	Cercocebus_galeritus
NGO	Cercopithecus_ascanius
NGO	Cercopithecus_cephus
NGO	Cercopithecus_neglectus
NGO	Cercopithecus_nictitans
NGO	Cercopithecus_pogonias
NGO	Chlorocebus_aethiops
NGO	Colobus_guereza
NGO	Euoticus_elegantulus
NGO	Galago_senegalensis
NGO	Galagoides_demidoff
NGO	Galagoides_thomasi
NGO	Lophocebus_albigena
NGO	Pan_troglodytes
NGO	Perodicticus_potto
NGO	Piliocolobus_badius
NIA	Chlorocebus_aethiops
NIA	Galago_moholi
NIA	Otolemur_crassicaudatus
NIA	Otolemur_garnettii
NIA	Papio_cynocephalus
NKK	Cercopithecus_mitis
NKK	Chlorocebus_aethiops
NKK	Galago_moholi
NKK	Galago_zanzibaricus
NKK	Otolemur_crassicaudatus
NKK	Papio_cynocephalus
NOU	Arctocebus_aureus
NOU	Cercocebus_galeritus
NOU	Cercopithecus_ascanius
NOU	Cercopithecus_cephus
NOU	Cercopithecus_neglectus
NOU	Cercopithecus_nictitans
NOU	Cercopithecus_pogonias
NOU	Colobus_guereza
NOU	Euoticus_elegantulus
NOU	Galagoides_demidoff
NOU	Galagoides_thomasi
NOU	Gorilla_gorilla
NOU	Lophocebus_albigena
NOU	Pan_troglodytes
NOU	Perodicticus_potto
NOU	Piliocolobus_badius
NYG	Arctocebus_aureus
NYG	Cercopithecus_cephus
NYG	Cercopithecus_nictitans
NYG	Cercopithecus_pogonias
NYG	Euoticus_elegantulus
NYG	Galagoides_demidoff
NYG	Gorilla_gorilla
NYG	Mandrillus_sphinx
NYG	Miopithecus_talapoin
NYG	Pan_troglodytes
NYG	Perodicticus_potto
NYU	Cercopithecus_ascanius
NYU	Cercopithecus_lhoesti
NYU	Cercopithecus_mitis
NYU	Chlorocebus_aethiops
NYU	Colobus_angolensis
NYU	Colobus_guereza
NYU	Galago_moholi
NYU	Galago_senegalensis
NYU	Galagoides_demidoff
NYU	Galagoides_thomasi
NYU	Gorilla_gorilla
NYU	Lophocebus_albigena
NYU	Otolemur_crassicaudatus
NYU	Pan_troglodytes
NYU	Papio_anubis
NYU	Perodicticus_potto
NYU	Piliocolobus_badius
ODZ	Arctocebus_aureus
ODZ	Cercocebus_galeritus
ODZ	Cercopithecus_cephus
ODZ	Cercopithecus_neglectus
ODZ	Cercopithecus_nictitans
ODZ	Cercopithecus_pogonias
ODZ	Colobus_guereza
ODZ	Colobus_satanas
ODZ	Euoticus_elegantulus
ODZ	Galago_alleni
ODZ	Galagoides_demidoff
ODZ	Gorilla_gorilla
ODZ	Lophocebus_albigena
ODZ	Miopithecus_talapoin
ODZ	Pan_troglodytes
ODZ	Perodicticus_potto
ODZ	Piliocolobus_badius
OLI	Chlorocebus_aethiops
OLI	Galago_moholi
OLI	Otolemur_crassicaudatus
OLI	Papio_ursinus
OMO	Cercopithecus_mitis
OMO	Cercopithecus_neglectus
OMO	Colobus_guereza
OMO	Erythrocebus_patas
OMO	Papio_anubis
PAMA	Chlorocebus_aethiops
PAMA	Erythrocebus_patas
PAMA	Galago_moholi
PAMA	Papio_anubis
RPON	Cercocebus_torquatus
RPON	Cercopithecus_campbelli
RPON	Cercopithecus_petaurista
RPON	Chlorocebus_aethiops
RPON	Colobus_polykomos
RPON	Galago_senegalensis
RPON	Pan_troglodytes
RPON	Papio_papio
RPON	Perodicticus_potto
RUA	Cercopithecus_mitis
RUA	Chlorocebus_aethiops
RUA	Galago_senegalensis
RUA	Otolemur_crassicaudatus
RUA	Papio_cynocephalus
RUK	Cercopithecus_mitis
RUK	Chlorocebus_aethiops
RUK	Galago_senegalensis
RUK	Otolemur_crassicaudatus
RUK	Papio_cynocephalus
RUS	Cercopithecus_ascanius
RUS	Chlorocebus_aethiops
RUS	Colobus_guereza
RUS	Galago_moholi
RUS	Galago_senegalensis
RUS	Otolemur_crassicaudatus
RUS	Pan_troglodytes
RUS	Papio_anubis
RUS	Piliocolobus_badius
RUV	Cercopithecus_ascanius
RUV	Cercopithecus_mitis
RUV	Chlorocebus_aethiops
RUV	Galago_moholi
RUV	Galago_senegalensis
RUV	Otolemur_crassicaudatus
RUV	Papio_anubis
RUV	Perodicticus_potto
RUV	Piliocolobus_badius
RWEN	Cercopithecus_ascanius
RWEN	Cercopithecus_mitis
RWEN	Chlorocebus_aethiops
RWEN	Colobus_guereza
RWEN	Galago_senegalensis
RWEN	Galagoides_demidoff
RWEN	Pan_troglodytes
RWEN	Papio_anubis
RWEN	Perodicticus_potto
RWEN	Piliocolobus_badius
SAHB	Chlorocebus_aethiops
SAHB	Erythrocebus_patas
SAHB	Galago_senegalensis
SAHB	Papio_anubis
SALO	Allenopithecus_nigroviridis
SALO	Cercocebus_galeritus
SALO	Cercopithecus_ascanius
SALO	Cercopithecus_neglectus
SALO	Cercopithecus_pogonias
SALO	Chlorocebus_aethiops
SALO	Colobus_angolensis
SALO	Galagoides_demidoff
SALO	Galagoides_thomasi
SALO	Lophocebus_albigena
SALO	Pan_paniscus
SALO	Piliocolobus_badius
SBS	Cercopithecus_mitis
SBS	Chlorocebus_aethiops
SBS	Colobus_guereza
SBS	Erythrocebus_patas
SBS	Galago_senegalensis
SBS	Otolemur_crassicaudatus
SBS	Papio_cynocephalus
SELO	Cercocebus_galeritus
SELO	Cercopithecus_mitis
SELO	Chlorocebus_aethiops
SELO	Colobus_angolensis
SELO	Galago_moholi
SELO	Galago_senegalensis
SELO	Galago_zanzibaricus
SELO	Galagoides_demidoff
SELO	Otolemur_crassicaudatus
SELO	Otolemur_garnettii
SELO	Papio_cynocephalus
SELO	Piliocolobus_badius
SHIM	Cercopithecus_erythrotis
SHIM	Chlorocebus_aethiops
SHIM	Colobus_polykomos
SHIM	Galago_senegalensis
SHIM	Otolemur_crassicaudatus
SIM	Chlorocebus_aethiops
SIM	Colobus_guereza
SIM	Papio_anubis
SIM	Papio_anubis
SIM	Theropithecus_gelada
SINM	Chlorocebus_aethiops
SINM	Erythrocebus_patas
SINM	Galago_senegalensis
SINM	Papio_anubis
SOK	Cercopithecus_mitis
SOK	Chlorocebus_aethiops
SOK	Galago_senegalensis
SOK	Papio_cynocephalus
SUD	Chlorocebus_aethiops
SUD	Erythrocebus_patas
SUD	Galago_senegalensis
SUD	Papio_anubis
TAI	Cercocebus_torquatus
TAI	Cercopithecus_diana
TAI	Cercopithecus_mona
TAI	Cercopithecus_nictitans
TAI	Cercopithecus_petaurista
TAI	Colobus_polykomos
TAI	Galagoides_demidoff
TAI	Pan_troglodytes
TAI	Perodicticus_potto
TAI	Piliocolobus_badius
TAI	Procolobus_verus
TAM	Chlorocebus_aethiops
TAM	Erythrocebus_patas
TAM	Galago_senegalensis
TAM	Papio_anubis
TON	Cercopithecus_ascanius
TON	Cercopithecus_mitis
TON	Chlorocebus_aethiops
TON	Galago_senegalensis
TON	Otolemur_crassicaudatus
TON	Pan_troglodytes
TON	Papio_anubis
TON	Papio_cynocephalus
TSA	Cercopithecus_mitis
TSA	Chlorocebus_aethiops
TSA	Galago_senegalensis
TSA	Otolemur_crassicaudatus
TSA	Papio_cynocephalus
TSO	Arctocebus_aureus
TSO	Cercopithecus_cephus
TSO	Cercopithecus_nictitans
TSO	Cercopithecus_pogonias
TSO	Euoticus_elegantulus
TSO	Galagoides_demidoff
TSO	Galagoides_thomasi
TSO	Gorilla_gorilla
TSO	Miopithecus_talapoin
TSO	Pan_troglodytes
TSO	Perodicticus_potto
VOL	Cercopithecus_ascanius
VOL	Cercopithecus_hamlyni
VOL	Cercopithecus_lhoesti
VOL	Cercopithecus_mitis
VOL	Cercopithecus_pogonias
VOL	Chlorocebus_aethiops
VOL	Colobus_angolensis
VOL	Colobus_guereza
VOL	Galago_matschiei
VOL	Galago_moholi
VOL	Galago_senegalensis
VOL	Galagoides_demidoff
VOL	Galagoides_thomasi
VOL	Gorilla_gorilla
VOL	Lophocebus_albigena
VOL	Otolemur_crassicaudatus
VOL	Pan_troglodytes
VOL	Papio_anubis
VOL	Perodicticus_potto
VOL	Piliocolobus_badius
VWA	Cercopithecus_mitis
VWA	Chlorocebus_aethiops
VWA	Galago_moholi
VWA	Galago_zanzibaricus
VWA	Otolemur_crassicaudatus
VWA	Papio_cynocephalus
WAZ	Chlorocebus_aethiops
WAZ	Erythrocebus_patas
WAZ	Galago_senegalensis
WAZ	Papio_anubis
WBKF	Chlorocebus_aethiops
WBKF	Erythrocebus_patas
WBKF	Galago_senegalensis
WBKF	Papio_anubis
WLU	Cercopithecus_mitis
WLU	Chlorocebus_aethiops
WLU	Otolemur_crassicaudatus
WLU	Papio_cynocephalus
WNI	Arctocebus_calabarensis
WNI	Cercocebus_torquatus
WNI	Cercopithecus_erythrotis
WNI	Cercopithecus_mona
WNI	Cercopithecus_nictitans
WNI	Euoticus_elegantulus
WNI	Galago_alleni
WNI	Galagoides_demidoff
WNI	Pan_troglodytes
WNI	Perodicticus_potto
WNIG	Chlorocebus_aethiops
WNIG	Erythrocebus_patas
WNIG	Galago_senegalensis
WNIG	Papio_anubis
ZAK	Chlorocebus_aethiops
ZAK	Erythrocebus_patas
ZAK	Galago_senegalensis
ZAK	Papio_anubis
ZEM	Cercopithecus_ascanius
ZEM	Cercopithecus_neglectus
ZEM	Cercopithecus_nictitans
ZEM	Chlorocebus_aethiops
ZEM	Colobus_guereza
ZEM	Erythrocebus_patas
ZEM	Galago_senegalensis
ZEM	Lophocebus_albigena
ZEM	Pan_troglodytes
ZEM	Papio_anubis
ZIN	Cercopithecus_mitis
ZIN	Chlorocebus_aethiops
ZIN	Galago_moholi
ZIN	Galago_zanzibaricus
ZIN	Otolemur_crassicaudatus
ZIN	Papio_anubis

## Sheet: Ungulate Comm Species Comp
SiteCode	Species
ABER	Aepyceros_melampus
ABER	Cephalophus_monticola
ABER	Diceros_bicornis
ABER	Hylochoerus_meinertzhageni
ABER	Kobus_ellipsiprymnus
ABER	Neotragus_moschatus
ABER	Oreotragus_oreotragus
ABER	Potamochoerus_larvatus
ABER	Raphicerus_campestris
ABER	Redunca_fulvorufula
ABER	Redunca_redunca
ABER	Sylvicapra_grimmia
ABER	Syncerus_caffer
ABER	Taurotragus_oryx
ABER	Tragelaphus_eurycerus
ABER	Tragelaphus_scriptus
ABI-SHA	Gazella_granti
ABI-SHA	Oreotragus_oreotragus
ABI-SHA	Ourebia_ourebi
ABI-SHA	Phacochoerus_africanus
ABI-SHA	Redunca_fulvorufula
ABI-SHA	Redunca_redunca
ABI-SHA	Sylvicapra_grimmia
ABI-SHA	Tragelaphus_scriptus
ABI-SHA	Tragelaphus_strepsiceros
ABTL	Alcelaphus_buselaphus
ABTL	Damaliscus_lunatus
ABTL	Gazella_rufifrons
ABTL	Giraffa_camelopardalis
ABTL	Hippotragus_equinus
ABTL	Phacochoerus_africanus
ABTL	Redunca_redunca
ABTL	Sylvicapra_grimmia
ABTL	Tragelaphus_scriptus
ABTL	Tragelaphus_strepsiceros
ADX	Addax_nasomaculatus
ADX	Gazella_dama
ADX	Gazella_dorcas
ADX	Gazella_leptoceros
AIHS	Antidorcas_marsupialis
AIHS	Equus_zebra
AIHS	Oreotragus_oreotragus
AIHS	Raphicerus_campestris
AIHS	Sylvicapra_grimmia
AKA	Aepyceros_melampus
AKA	Cephalophus_monticola
AKA	Cephalophus_nigrifrons
AKA	Damaliscus_lunatus
AKA	Equus_burchellii
AKA	Giraffa_camelopardalis
AKA	Hippopotamus_amphibius
AKA	Hippotragus_equinus
AKA	Kobus_ellipsiprymnus
AKA	Oreotragus_oreotragus
AKA	Ourebia_ourebi
AKA	Phacochoerus_africanus
AKA	Potamochoerus_larvatus
AKA	Redunca_redunca
AKA	Sylvicapra_grimmia
AKA	Syncerus_caffer
AKA	Taurotragus_oryx
AKA	Tragelaphus_scriptus
AKA	Tragelaphus_spekii
AKA	Tragelaphus_strepsiceros
AMB	Aepyceros_melampus
AMB	Alcelaphus_buselaphus
AMB	Connochaetes_taurinus
AMB	Diceros_bicornis
AMB	Equus_burchellii
AMB	Gazella_granti
AMB	Gazella_thomsonii
AMB	Giraffa_camelopardalis
AMB	Hippopotamus_amphibius
AMB	Kobus_ellipsiprymnus
AMB	Litocranius_walleri
AMB	Madoqua_kirkii
AMB	Oryx_gazella
AMB	Phacochoerus_africanus
AMB	Raphicerus_campestris
AMB	Redunca_redunca
AMB	Syncerus_caffer
AMB	Taurotragus_oryx
AMB	Tragelaphus_imberbis
AMB	Tragelaphus_scriptus
ANG	Aepyceros_melampus
ANG	Alcelaphus_buselaphus
ANG	Ceratotherium_simum
ANG	Connochaetes_taurinus
ANG	Damaliscus_lunatus
ANG	Diceros_bicornis
ANG	Equus_burchellii
ANG	Giraffa_camelopardalis
ANG	Hippopotamus_amphibius
ANG	Hippotragus_equinus
ANG	Hippotragus_niger
ANG	Kobus_ellipsiprymnus
ANG	Kobus_leche
ANG	Kobus_vardonii
ANG	Ourebia_ourebi
ANG	Phacochoerus_africanus
ANG	Potamochoerus_larvatus
ANG	Raphicerus_campestris
ANG	Redunca_arundinum
ANG	Sigmoceros_lichtensteinii
ANG	Sylvicapra_grimmia
ANG	Syncerus_caffer
ANG	Taurotragus_oryx
ANG	Tragelaphus_scriptus
ANG	Tragelaphus_spekii
ANG	Tragelaphus_strepsiceros
ANME	Gazella_dama
ANME	Gazella_dorcas
ANME	Gazella_rufifrons
ANME	Giraffa_camelopardalis
APFR	Alcelaphus_buselaphus
APFR	Cephalophus_rufilatus
APFR	Damaliscus_lunatus
APFR	Gazella_rufifrons
APFR	Hippotragus_equinus
APFR	Kobus_ellipsiprymnus
APFR	Kobus_kob
APFR	Ourebia_ourebi
APFR	Phacochoerus_africanus
APFR	Redunca_redunca
APFR	Sylvicapra_grimmia
APFR	Syncerus_caffer
APFR	Tragelaphus_scriptus
ARAW	Damaliscus_hunteri
ARAW	Damaliscus_lunatus
ARAW	Diceros_bicornis
ARAW	Equus_burchellii
ARAW	Equus_grevyi
ARAW	Gazella_granti
ARAW	Giraffa_camelopardalis
ARAW	Litocranius_walleri
ARAW	Madoqua_kirkii
ARAW	Oryx_gazella
ARAW	Phacochoerus_aethiopicus
ARAW	Sylvicapra_grimmia
ARAW	Syncerus_caffer
ARAW	Taurotragus_oryx
ARAW	Tragelaphus_imberbis
ARU	Aepyceros_melampus
ARU	Cephalophus_monticola
ARU	Diceros_bicornis
ARU	Equus_burchellii
ARU	Giraffa_camelopardalis
ARU	Hippopotamus_amphibius
ARU	Hylochoerus_meinertzhageni
ARU	Kobus_ellipsiprymnus
ARU	Madoqua_kirkii
ARU	Neotragus_moschatus
ARU	Phacochoerus_africanus
ARU	Potamochoerus_larvatus
ARU	Redunca_redunca
ARU	Sylvicapra_grimmia
ARU	Syncerus_caffer
ARU	Tragelaphus_scriptus
ATFR	Alcelaphus_buselaphus
ATFR	Cephalophus_rufilatus
ATFR	Damaliscus_lunatus
ATFR	Gazella_rufifrons
ATFR	Hippotragus_equinus
ATFR	Kobus_ellipsiprymnus
ATFR	Kobus_kob
ATFR	Ourebia_ourebi
ATFR	Phacochoerus_africanus
ATFR	Redunca_redunca
ATFR	Sylvicapra_grimmia
ATFR	Syncerus_caffer
ATFR	Tragelaphus_scriptus
ATNR	Addax_nasomaculatus
ATNR	Gazella_dorcas
ATNR	Gazella_leptoceros
ATNR	Phacochoerus_africanus
AWA	Alcelaphus_buselaphus
AWA	Gazella_soemmerringii
AWA	Hippopotamus_amphibius
AWA	Kobus_ellipsiprymnus
AWA	Madoqua_saltiana
AWA	Oreotragus_oreotragus
AWA	Oryx_gazella
AWA	Phacochoerus_africanus
AWA	Potamochoerus_larvatus
AWA	Redunca_redunca
AWA	Sylvicapra_grimmia
AWA	Tragelaphus_buxtoni
AWA	Tragelaphus_imberbis
AWA	Tragelaphus_scriptus
AWA	Tragelaphus_strepsiceros
BAD	Alcelaphus_buselaphus
BAD	Cephalophus_maxwellii
BAD	Cephalophus_rufilatus
BAD	Hippotragus_equinus
BAD	Kobus_ellipsiprymnus
BAD	Kobus_kob
BAD	Ourebia_ourebi
BAD	Phacochoerus_africanus
BAD	Potamochoerus_porcus
BAD	Redunca_redunca
BAD	Sylvicapra_grimmia
BAD	Syncerus_caffer
BAD	Taurotragus_derbianus
BAD	Tragelaphus_scriptus
BAD	Tragelaphus_spekii
BALE	Hylochoerus_meinertzhageni
BALE	Oreotragus_oreotragus
BALE	Phacochoerus_africanus
BALE	Potamochoerus_larvatus
BALE	Redunca_redunca
BALE	Sylvicapra_grimmia
BALE	Tragelaphus_scriptus
BAN	Aepyceros_melampus
BAN	Cephalophus_monticola
BAN	Cephalophus_silvicultor
BAN	Damaliscus_lunatus
BAN	Equus_burchellii
BAN	Hippopotamus_amphibius
BAN	Hippotragus_equinus
BAN	Hippotragus_niger
BAN	Kobus_ellipsiprymnus
BAN	Kobus_leche
BAN	Kobus_vardonii
BAN	Oreotragus_oreotragus
BAN	Ourebia_ourebi
BAN	Phacochoerus_africanus
BAN	Potamochoerus_larvatus
BAN	Raphicerus_sharpei
BAN	Redunca_arundinum
BAN	Sigmoceros_lichtensteinii
BAN	Sylvicapra_grimmia
BAN	Syncerus_caffer
BAN	Taurotragus_oryx
BAN	Tragelaphus_scriptus
BAN	Tragelaphus_spekii
BASA	Alcelaphus_buselaphus
BASA	Damaliscus_lunatus
BASA	Gazella_rufifrons
BASA	Giraffa_camelopardalis
BASA	Hippotragus_equinus
BASA	Kobus_ellipsiprymnus
BASA	Kobus_kob
BASA	Ourebia_ourebi
BASA	Phacochoerus_africanus
BASA	Redunca_redunca
BASA	Sylvicapra_grimmia
BASA	Syncerus_caffer
BASA	Tragelaphus_scriptus
BASA	Tragelaphus_strepsiceros
BAZ	Aepyceros_melampus
BAZ	Neotragus_moschatus
BAZ	Phacochoerus_africanus
BAZ	Raphicerus_campestris
BAZ	Raphicerus_sharpei
BAZ	Redunca_arundinum
BAZ	Sylvicapra_grimmia
BAZ	Tragelaphus_scriptus
BBN	Cephalophus_callipygus
BBN	Cephalophus_dorsalis
BBN	Cephalophus_leucogaster
BBN	Cephalophus_monticola
BBN	Cephalophus_nigrifrons
BBN	Cephalophus_silvicultor
BBN	Hyemoschus_aquaticus
BBN	Hylochoerus_meinertzhageni
BBN	Neotragus_batesi
BBN	Potamochoerus_porcus
BBN	Syncerus_caffer
BBN	Tragelaphus_eurycerus
BBN	Tragelaphus_spekii
BEN	Alcelaphus_buselaphus
BEN	Cephalophus_rufilatus
BEN	Damaliscus_lunatus
BEN	Giraffa_camelopardalis
BEN	Hippotragus_equinus
BEN	Kobus_ellipsiprymnus
BEN	Kobus_kob
BEN	Ourebia_ourebi
BEN	Phacochoerus_africanus
BEN	Potamochoerus_porcus
BEN	Redunca_redunca
BEN	Sylvicapra_grimmia
BEN	Syncerus_caffer
BEN	Taurotragus_derbianus
BEN	Tragelaphus_scriptus
BF	Cephalophus_monticola
BF	Cephalophus_nigrifrons
BF	Cephalophus_weynsi
BF	Equus_burchellii
BF	Hippopotamus_amphibius
BF	Kobus_ellipsiprymnus
BF	Oreotragus_oreotragus
BF	Ourebia_ourebi
BF	Phacochoerus_africanus
BF	Potamochoerus_larvatus
BF	Redunca_redunca
BF	Sylvicapra_grimmia
BF	Syncerus_caffer
BF	Tragelaphus_scriptus
BHINE	Aepyceros_melampus
BHINE	Connochaetes_taurinus
BHINE	Equus_burchellii
BHINE	Giraffa_camelopardalis
BHINE	Hippopotamus_amphibius
BHINE	Neotragus_moschatus
BHINE	Ourebia_ourebi
BHINE	Phacochoerus_africanus
BHINE	Potamochoerus_larvatus
BHINE	Raphicerus_campestris
BHINE	Raphicerus_sharpei
BHINE	Redunca_arundinum
BHINE	Sylvicapra_grimmia
BHINE	Syncerus_caffer
BHINE	Taurotragus_oryx
BHINE	Tragelaphus_angasii
BHINE	Tragelaphus_scriptus
BHINE	Tragelaphus_strepsiceros
BIK	Aepyceros_melampus
BIK	Connochaetes_taurinus
BIK	Equus_burchellii
BIK	Hippopotamus_amphibius
BIK	Kobus_ellipsiprymnus
BIK	Madoqua_kirkii
BIK	Oreotragus_oreotragus
BIK	Ourebia_ourebi
BIK	Phacochoerus_africanus
BIK	Potamochoerus_larvatus
BIK	Raphicerus_campestris
BIK	Redunca_arundinum
BIK	Sylvicapra_grimmia
BIK	Syncerus_caffer
BIK	Taurotragus_oryx
BIK	Tragelaphus_scriptus
BIK	Tragelaphus_strepsiceros
BIN	Alcelaphus_buselaphus
BIN	Damaliscus_lunatus
BIN	Hippotragus_equinus
BIN	Kobus_ellipsiprymnus
BIN	Kobus_kob
BIN	Ourebia_ourebi
BIN	Phacochoerus_africanus
BIN	Potamochoerus_porcus
BIN	Redunca_redunca
BIN	Sylvicapra_grimmia
BIN	Syncerus_caffer
BIN	Tragelaphus_scriptus
BON	Alcelaphus_buselaphus
BON	Cephalophus_rufilatus
BON	Hippotragus_equinus
BON	Kobus_ellipsiprymnus
BON	Kobus_kob
BON	Ourebia_ourebi
BON	Phacochoerus_africanus
BON	Redunca_redunca
BON	Sylvicapra_grimmia
BON	Tragelaphus_scriptus
BOUH	Ammotragus_lervia
BOUH	Gazella_cuvieri
BOUH	Gazella_dorcas
BOUH	Sus_scrofa
BUD	Cephalophus_nigrifrons
BUD	Hippopotamus_amphibius
BUD	Phacochoerus_aethiopicus
BUD	Potamochoerus_larvatus
BUD	Syncerus_caffer
BUD	Tragelaphus_scriptus
BUF	Antidorcas_marsupialis
BUF	Cephalophus_monticola
BUF	Oreotragus_oreotragus
BUF	Ourebia_ourebi
BUF	Phacochoerus_africanus
BUF	Potamochoerus_larvatus
BUF	Raphicerus_campestris
BUF	Sylvicapra_grimmia
BUF	Syncerus_caffer
BUF	Taurotragus_oryx
BUF	Tragelaphus_scriptus
BUF	Tragelaphus_strepsiceros
CHAM	Ammotragus_lervia
CHAM	Gazella_cuvieri
CHAM	Gazella_dorcas
CHAM	Sus_scrofa
CHO	Aepyceros_melampus
CHO	Ceratotherium_simum
CHO	Connochaetes_taurinus
CHO	Damaliscus_lunatus
CHO	Diceros_bicornis
CHO	Equus_burchellii
CHO	Giraffa_camelopardalis
CHO	Hippopotamus_amphibius
CHO	Hippotragus_equinus
CHO	Hippotragus_niger
CHO	Kobus_ellipsiprymnus
CHO	Kobus_leche
CHO	Kobus_vardonii
CHO	Oryx_gazella
CHO	Ourebia_ourebi
CHO	Phacochoerus_africanus
CHO	Potamochoerus_larvatus
CHO	Raphicerus_campestris
CHO	Redunca_arundinum
CHO	Sylvicapra_grimmia
CHO	Syncerus_caffer
CHO	Taurotragus_oryx
CHO	Tragelaphus_scriptus
CHO	Tragelaphus_spekii
CHO	Tragelaphus_strepsiceros
CLB	Gazella_rufifrons
CLB	Hippotragus_equinus
CLB	Kobus_ellipsiprymnus
CLB	Sylvicapra_grimmia
CMA	Cephalophus_callipygus
CMA	Cephalophus_dorsalis
CMA	Cephalophus_leucogaster
CMA	Cephalophus_monticola
CMA	Cephalophus_nigrifrons
CMA	Cephalophus_silvicultor
CMA	Hippopotamus_amphibius
CMA	Hyemoschus_aquaticus
CMA	Hylochoerus_meinertzhageni
CMA	Neotragus_batesi
CMA	Potamochoerus_porcus
CMA	Syncerus_caffer
CMA	Tragelaphus_scriptus
CMA	Tragelaphus_spekii
COM	Alcelaphus_buselaphus
COM	Cephalophus_dorsalis
COM	Cephalophus_niger
COM	Cephalophus_rufilatus
COM	Cephalophus_silvicultor
COM	Hippopotamus_amphibius
COM	Hippotragus_equinus
COM	Hyemoschus_aquaticus
COM	Hylochoerus_meinertzhageni
COM	Kobus_ellipsiprymnus
COM	Kobus_kob
COM	Neotragus_pygmaeus
COM	Ourebia_ourebi
COM	Phacochoerus_africanus
COM	Potamochoerus_porcus
COM	Procavia_capensis
COM	Protoxerus_stangeri
COM	Redunca_redunca
COM	Sylvicapra_grimmia
COM	Syncerus_caffer
COM	Tragelaphus_eurycerus
COM	Tragelaphus_scriptus
CON	Cephalophus_callipygus
CON	Cephalophus_dorsalis
CON	Cephalophus_leucogaster
CON	Cephalophus_monticola
CON	Cephalophus_nigrifrons
CON	Cephalophus_silvicultor
CON	Hyemoschus_aquaticus
CON	Kobus_ellipsiprymnus
CON	Potamochoerus_porcus
CON	Redunca_arundinum
CON	Syncerus_caffer
CON	Tragelaphus_scriptus
CON	Tragelaphus_spekii
CONG	Cephalophus_callipygus
CONG	Cephalophus_dorsalis
CONG	Cephalophus_leucogaster
CONG	Cephalophus_monticola
CONG	Cephalophus_nigrifrons
CONG	Cephalophus_silvicultor
CONG	Hippopotamus_amphibius
CONG	Hyemoschus_aquaticus
CONG	Potamochoerus_porcus
CONG	Syncerus_caffer
CONG	Tragelaphus_eurycerus
CONG	Tragelaphus_scriptus
CONG	Tragelaphus_spekii
CROS	Cephalophus_dorsalis
CROS	Cephalophus_monticola
CROS	Cephalophus_ogilbyi
CROS	Cephalophus_silvicultor
CROS	Hippopotamus_amphibius
CROS	Hyemoschus_aquaticus
CROS	Potamochoerus_porcus
CROS	Syncerus_caffer
CROS	Tragelaphus_scriptus
CROS	Tragelaphus_spekii
DEUX	Alcelaphus_buselaphus
DEUX	Cephalophus_rufilatus
DEUX	Gazella_rufifrons
DEUX	Hippotragus_equinus
DEUX	Kobus_ellipsiprymnus
DEUX	Kobus_kob
DEUX	Ourebia_ourebi
DEUX	Phacochoerus_africanus
DEUX	Redunca_redunca
DEUX	Sylvicapra_grimmia
DEUX	Tragelaphus_scriptus
DVGP	Alcelaphus_buselaphus
DVGP	Antidorcas_marsupialis
DVGP	Madoqua_kirkii
DVGP	Oreotragus_oreotragus
DVGP	Oryx_gazella
DVGP	Phacochoerus_africanus
DVGP	Raphicerus_campestris
DVGP	Sylvicapra_grimmia
DVGP	Tragelaphus_strepsiceros
ENIG	Cephalophus_maxwellii
ENIG	Cephalophus_monticola
ENIG	Cephalophus_niger
ENIG	Cephalophus_silvicultor
ENIG	Hexaprotodon_liberiensis
ENIG	Hippopotamus_amphibius
ENIG	Hyemoschus_aquaticus
ENIG	Potamochoerus_porcus
ENIG	Syncerus_caffer
ENIG	Tragelaphus_scriptus
ENIG	Tragelaphus_spekii
ETO	Aepyceros_melampus
ETO	Alcelaphus_buselaphus
ETO	Antidorcas_marsupialis
ETO	Connochaetes_taurinus
ETO	Equus_burchellii
ETO	Equus_zebra
ETO	Giraffa_camelopardalis
ETO	Hippotragus_equinus
ETO	Madoqua_kirkii
ETO	Oreotragus_oreotragus
ETO	Oryx_gazella
ETO	Phacochoerus_africanus
ETO	Sylvicapra_grimmia
ETO	Taurotragus_oryx
ETO	Tragelaphus_strepsiceros
FADA	Addax_nasomaculatus
FADA	Gazella_dama
FADA	Gazella_dorcas
FADA	Gazella_leptoceros
GAM	Alcelaphus_buselaphus
GAM	Damaliscus_lunatus
GAM	Giraffa_camelopardalis
GAM	Hippopotamus_amphibius
GAM	Hippotragus_equinus
GAM	Hylochoerus_meinertzhageni
GAM	Kobus_ellipsiprymnus
GAM	Kobus_kob
GAM	Kobus_megaceros
GAM	Ourebia_ourebi
GAM	Phacochoerus_africanus
GAM	Potamochoerus_larvatus
GAM	Redunca_redunca
GAM	Sylvicapra_grimmia
GAM	Syncerus_caffer
GAM	Tragelaphus_scriptus
GAR	Alcelaphus_buselaphus
GAR	Ammotragus_lervia
GAR	Cephalophus_monticola
GAR	Cephalophus_rufilatus
GAR	Cephalophus_silvicultor
GAR	Ceratotherium_simum
GAR	Giraffa_camelopardalis
GAR	Hippotragus_equinus
GAR	Hylochoerus_meinertzhageni
GAR	Kobus_kob
GAR	Okapia_johnstoni
GAR	Ourebia_ourebi
GAR	Phacochoerus_africanus
GAR	Potamochoerus_larvatus
GAR	Potamochoerus_porcus
GAR	Redunca_redunca
GAR	Sylvicapra_grimmia
GAR	Syncerus_caffer
GAR	Taurotragus_derbianus
GAR	Tragelaphus_eurycerus
GAR	Tragelaphus_scriptus
GAR	Tragelaphus_spekii
GEM	Antidorcas_marsupialis
GEM	Connochaetes_taurinus
GEM	Oreotragus_oreotragus
GEM	Oryx_gazella
GEM	Phacochoerus_aethiopicus
GEM	Raphicerus_campestris
GEM	Sylvicapra_grimmia
GEM	Syncerus_caffer
GEM	Taurotragus_oryx
GEM	Tragelaphus_strepsiceros
GHO	Aepyceros_melampus
GHO	Connochaetes_taurinus
GHO	Damaliscus_lunatus
GHO	Equus_burchellii
GHO	Giraffa_camelopardalis
GHO	Hippopotamus_amphibius
GHO	Hippotragus_equinus
GHO	Hippotragus_niger
GHO	Kobus_ellipsiprymnus
GHO	Neotragus_moschatus
GHO	Oreotragus_oreotragus
GHO	Ourebia_ourebi
GHO	Phacochoerus_africanus
GHO	Potamochoerus_larvatus
GHO	Raphicerus_campestris
GHO	Raphicerus_sharpei
GHO	Redunca_arundinum
GHO	Sigmoceros_lichtensteinii
GHO	Sylvicapra_grimmia
GHO	Syncerus_caffer
GHO	Taurotragus_oryx
GHO	Tragelaphus_angasii
GHO	Tragelaphus_scriptus
GHO	Tragelaphus_strepsiceros
GILE	Connochaetes_taurinus
GILE	Equus_burchellii
GILE	Hippopotamus_amphibius
GILE	Hippotragus_niger
GILE	Kobus_ellipsiprymnus
GILE	Neotragus_moschatus
GILE	Oreotragus_oreotragus
GILE	Phacochoerus_africanus
GILE	Potamochoerus_larvatus
GILE	Raphicerus_sharpei
GILE	Redunca_arundinum
GILE	Sigmoceros_lichtensteinii
GILE	Sylvicapra_grimmia
GILE	Syncerus_caffer
GILE	Taurotragus_oryx
GILE	Tragelaphus_scriptus
GILE	Tragelaphus_strepsiceros
GISH	Aepyceros_melampus
GISH	Cephalophus_monticola
GISH	Cephalophus_nigrifrons
GISH	Cephalophus_weynsi
GISH	Equus_burchellii
GISH	Hyemoschus_aquaticus
GISH	Hylochoerus_meinertzhageni
GISH	Kobus_ellipsiprymnus
GISH	Kobus_kob
GISH	Oreotragus_oreotragus
GISH	Ourebia_ourebi
GISH	Phacochoerus_africanus
GISH	Potamochoerus_larvatus
GISH	Redunca_redunca
GISH	Sylvicapra_grimmia
GISH	Syncerus_caffer
GISH	Taurotragus_oryx
GISH	Tragelaphus_scriptus
GISH	Tragelaphus_spekii
GOLD	Alcelaphus_buselaphus
GOLD	Antidorcas_marsupialis
GOLD	Connochaetes_gnou
GOLD	Damaliscus_pygargus
GOLD	Equus_burchellii
GOLD	Ourebia_ourebi
GOLD	Pelea_capreolus
GOLD	Phacochoerus_aethiopicus
GOLD	Raphicerus_campestris
GOLD	Redunca_arundinum
GOLD	Redunca_fulvorufula
GOLD	Syncerus_caffer
GOLD	Taurotragus_oryx
GOMB	Aepyceros_melampus
GOMB	Cephalophus_monticola
GOMB	Damaliscus_lunatus
GOMB	Equus_burchellii
GOMB	Hippopotamus_amphibius
GOMB	Hippotragus_equinus
GOMB	Hippotragus_niger
GOMB	Kobus_ellipsiprymnus
GOMB	Oreotragus_oreotragus
GOMB	Ourebia_ourebi
GOMB	Phacochoerus_africanus
GOMB	Potamochoerus_larvatus
GOMB	Redunca_redunca
GOMB	Sigmoceros_lichtensteinii
GOMB	Sylvicapra_grimmia
GOMB	Syncerus_caffer
GOMB	Tragelaphus_scriptus
GOMB	Tragelaphus_spekii
GOR	Aepyceros_melampus
GOR	Cephalophus_monticola
GOR	Connochaetes_taurinus
GOR	Equus_burchellii
GOR	Hippotragus_niger
GOR	Kobus_ellipsiprymnus
GOR	Neotragus_moschatus
GOR	Oreotragus_oreotragus
GOR	Ourebia_ourebi
GOR	Phacochoerus_africanus
GOR	Potamochoerus_larvatus
GOR	Raphicerus_campestris
GOR	Raphicerus_sharpei
GOR	Redunca_arundinum
GOR	Sigmoceros_lichtensteinii
GOR	Sylvicapra_grimmia
GOR	Syncerus_caffer
GOR	Taurotragus_oryx
GOR	Tragelaphus_angasii
GOR	Tragelaphus_scriptus
GOR	Tragelaphus_strepsiceros
GUS	Alcelaphus_buselaphus
GUS	Cephalophus_rufilatus
GUS	Diceros_bicornis
GUS	Gazella_rufifrons
GUS	Giraffa_camelopardalis
GUS	Hippopotamus_amphibius
GUS	Hippotragus_equinus
GUS	Hylochoerus_meinertzhageni
GUS	Kobus_ellipsiprymnus
GUS	Kobus_kob
GUS	Kobus_leche
GUS	Oreotragus_oreotragus
GUS	Ourebia_ourebi
GUS	Phacochoerus_africanus
GUS	Potamochoerus_porcus
GUS	Redunca_redunca
GUS	Sylvicapra_grimmia
GUS	Syncerus_caffer
GUS	Taurotragus_derbianus
GUS	Tragelaphus_scriptus
HAD	Equus_asinus
HAD	Gazella_soemmerringii
HAD	Gazella_spekei
HAD	Hippopotamus_amphibius
HAD	Litocranius_walleri
HAD	Madoqua_saltiana
HAD	Oryx_gazella
HAD	Phacochoerus_aethiopicus
HLU	Aepyceros_melampus
HLU	Cephalophus_natalensis
HLU	Ceratotherium_simum
HLU	Connochaetes_taurinus
HLU	Diceros_bicornis
HLU	Equus_burchellii
HLU	Giraffa_camelopardalis
HLU	Hippopotamus_amphibius
HLU	Kobus_ellipsiprymnus
HLU	Neotragus_moschatus
HLU	Oreotragus_oreotragus
HLU	Phacochoerus_africanus
HLU	Potamochoerus_larvatus
HLU	Raphicerus_campestris
HLU	Redunca_arundinum
HLU	Redunca_fulvorufula
HLU	Sylvicapra_grimmia
HLU	Syncerus_caffer
HLU	Taurotragus_oryx
HLU	Tragelaphus_angasii
HLU	Tragelaphus_scriptus
HLU	Tragelaphus_strepsiceros
HWA	Aepyceros_melampus
HWA	Connochaetes_taurinus
HWA	Damaliscus_lunatus
HWA	Equus_burchellii
HWA	Giraffa_camelopardalis
HWA	Hippopotamus_amphibius
HWA	Hippotragus_equinus
HWA	Hippotragus_niger
HWA	Kobus_ellipsiprymnus
HWA	Oreotragus_oreotragus
HWA	Oryx_gazella
HWA	Ourebia_ourebi
HWA	Phacochoerus_africanus
HWA	Potamochoerus_larvatus
HWA	Raphicerus_campestris
HWA	Raphicerus_sharpei
HWA	Redunca_arundinum
HWA	Sylvicapra_grimmia
HWA	Syncerus_caffer
HWA	Taurotragus_oryx
HWA	Tragelaphus_scriptus
HWA	Tragelaphus_strepsiceros
ILES	Cephalophus_maxwellii
ILES	Cephalophus_rufilatus
ILES	Cephalophus_silvicultor
ILES	Kobus_kob
ILES	Phacochoerus_africanus
ILES	Potamochoerus_porcus
ILES	Redunca_redunca
ILES	Sylvicapra_grimmia
ILES	Tragelaphus_scriptus
IONA	Aepyceros_melampus
IONA	Antidorcas_marsupialis
IONA	Connochaetes_taurinus
IONA	Equus_burchellii
IONA	Equus_zebra
IONA	Giraffa_camelopardalis
IONA	Hippopotamus_amphibius
IONA	Madoqua_kirkii
IONA	Oreotragus_oreotragus
IONA	Oryx_gazella
IONA	Phacochoerus_africanus
IONA	Raphicerus_campestris
IONA	Sylvicapra_grimmia
IONA	Tragelaphus_strepsiceros
ITG	Aepyceros_melampus
ITG	Cephalophus_monticola
ITG	Diceros_bicornis
ITG	Equus_burchellii
ITG	Hippopotamus_amphibius
ITG	Hippotragus_equinus
ITG	Hippotragus_niger
ITG	Kobus_ellipsiprymnus
ITG	Kobus_vardonii
ITG	Oreotragus_oreotragus
ITG	Phacochoerus_africanus
ITG	Potamochoerus_porcus
ITG	Raphicerus_sharpei
ITG	Redunca_arundinum
ITG	Sigmoceros_lichtensteinii
ITG	Sylvicapra_grimmia
ITG	Syncerus_caffer
ITG	Taurotragus_oryx
ITG	Tragelaphus_scriptus
ITG	Tragelaphus_spekii
KAB	Alcelaphus_buselaphus
KAB	Cephalophus_rufilatus
KAB	Gazella_rufifrons
KAB	Hippotragus_equinus
KAB	Kobus_ellipsiprymnus
KAB	Kobus_kob
KAB	Ourebia_ourebi
KAB	Phacochoerus_africanus
KAB	Redunca_redunca
KAB	Sylvicapra_grimmia
KAB	Syncerus_caffer
KAB	Tragelaphus_scriptus
KAFF	Aepyceros_melampus
KAFF	Connochaetes_taurinus
KAFF	Equus_burchellii
KAFF	Hippopotamus_amphibius
KAFF	Hippotragus_equinus
KAFF	Hippotragus_niger
KAFF	Kobus_ellipsiprymnus
KAFF	Kobus_leche
KAFF	Kobus_vardonii
KAFF	Ourebia_ourebi
KAFF	Phacochoerus_africanus
KAFF	Potamochoerus_larvatus
KAFF	Raphicerus_sharpei
KAFF	Redunca_arundinum
KAFF	Sigmoceros_lichtensteinii
KAFF	Sylvicapra_grimmia
KAFF	Syncerus_caffer
KAFF	Taurotragus_oryx
KAFF	Tragelaphus_scriptus
KAFF	Tragelaphus_spekii
KAFF	Tragelaphus_strepsiceros
KAK	Cephalophus_callipygus
KAK	Cephalophus_monticola
KAK	Cephalophus_nigrifrons
KAK	Cephalophus_silvicultor
KAK	Potamochoerus_porcus
KAK	Sylvicapra_grimmia
KALT	Antidorcas_marsupialis
KALT	Oryx_gazella
KALT	Raphicerus_campestris
KALT	Sylvicapra_grimmia
KAM	Cephalophus_monticola
KAM	Cephalophus_silvicultor
KAM	Connochaetes_taurinus
KAM	Damaliscus_lunatus
KAM	Equus_burchellii
KAM	Gazella_thomsonii
KAM	Hippotragus_equinus
KAM	Kobus_leche
KAM	Ourebia_ourebi
KAM	Potamochoerus_larvatus
KAM	Raphicerus_campestris
KAM	Redunca_arundinum
KAM	Sigmoceros_lichtensteinii
KAM	Sylvicapra_grimmia
KAM	Syncerus_caffer
KAM	Taurotragus_oryx
KAM	Tragelaphus_scriptus
KAM	Tragelaphus_spekii
KANG	Cephalophus_monticola
KANG	Cephalophus_silvicultor
KANG	Hippotragus_equinus
KANG	Kobus_ellipsiprymnus
KANG	Oreotragus_oreotragus
KANG	Phacochoerus_africanus
KANG	Potamochoerus_larvatus
KANG	Redunca_arundinum
KANG	Sylvicapra_grimmia
KANG	Syncerus_caffer
KANG	Tragelaphus_scriptus
KANG	Tragelaphus_spekii
KAP	Aepyceros_melampus
KAP	Alcelaphus_buselaphus
KAP	Ceratotherium_simum
KAP	Connochaetes_taurinus
KAP	Damaliscus_lunatus
KAP	Equus_burchellii
KAP	Giraffa_camelopardalis
KAP	Hippopotamus_amphibius
KAP	Kobus_ellipsiprymnus
KAP	Oryx_gazella
KAP	Phacochoerus_africanus
KAP	Potamochoerus_larvatus
KAP	Raphicerus_campestris
KAP	Redunca_fulvorufula
KAP	Sylvicapra_grimmia
KAP	Syncerus_caffer
KAP	Taurotragus_oryx
KAP	Tragelaphus_angasii
KAP	Tragelaphus_scriptus
KAP	Tragelaphus_strepsiceros
KAS	Aepyceros_melampus
KAS	Cephalophus_monticola
KAS	Equus_burchellii
KAS	Giraffa_camelopardalis
KAS	Hippotragus_equinus
KAS	Hippotragus_niger
KAS	Kobus_ellipsiprymnus
KAS	Kobus_vardonii
KAS	Oreotragus_oreotragus
KAS	Ourebia_ourebi
KAS	Phacochoerus_africanus
KAS	Potamochoerus_larvatus
KAS	Raphicerus_sharpei
KAS	Redunca_arundinum
KAS	Sigmoceros_lichtensteinii
KAS	Sylvicapra_grimmia
KAS	Syncerus_caffer
KAS	Taurotragus_oryx
KAS	Tragelaphus_scriptus
KAS	Tragelaphus_strepsiceros
KBIR	Aepyceros_melampus
KBIR	Cephalophus_monticola
KBIR	Cephalophus_nigrifrons
KBIR	Cephalophus_weynsi
KBIR	Damaliscus_lunatus
KBIR	Hyemoschus_aquaticus
KBIR	Hylochoerus_meinertzhageni
KBIR	Kobus_ellipsiprymnus
KBIR	Oreotragus_oreotragus
KBIR	Ourebia_ourebi
KBIR	Phacochoerus_africanus
KBIR	Potamochoerus_larvatus
KBIR	Redunca_redunca
KBIR	Sigmoceros_lichtensteinii
KBIR	Sylvicapra_grimmia
KBIR	Syncerus_caffer
KBIR	Taurotragus_oryx
KBIR	Tragelaphus_scriptus
KBIR	Tragelaphus_spekii
KFAL	Alcelaphus_buselaphus
KFAL	Cephalophus_monticola
KFAL	Cephalophus_natalensis
KFAL	Giraffa_camelopardalis
KFAL	Hippopotamus_amphibius
KFAL	Kobus_ellipsiprymnus
KFAL	Kobus_kob
KFAL	Ourebia_ourebi
KFAL	Phacochoerus_africanus
KFAL	Potamochoerus_larvatus
KFAL	Redunca_redunca
KFAL	Sylvicapra_grimmia
KFAL	Syncerus_caffer
KFNP	Aepyceros_melampus
KFNP	Connochaetes_taurinus
KFNP	Equus_burchellii
KFNP	Hippopotamus_amphibius
KFNP	Hippotragus_equinus
KFNP	Hippotragus_niger
KFNP	Kobus_ellipsiprymnus
KFNP	Kobus_leche
KFNP	Kobus_vardonii
KFNP	Ourebia_ourebi
KFNP	Phacochoerus_africanus
KFNP	Potamochoerus_larvatus
KFNP	Raphicerus_sharpei
KFNP	Redunca_arundinum
KFNP	Sigmoceros_lichtensteinii
KFNP	Sylvicapra_grimmia
KFNP	Syncerus_caffer
KFNP	Taurotragus_oryx
KFNP	Tragelaphus_scriptus
KFNP	Tragelaphus_spekii
KFNP	Tragelaphus_strepsiceros
KHA	Connochaetes_taurinus
KHA	Damaliscus_lunatus
KHA	Equus_burchellii
KHA	Giraffa_camelopardalis
KHA	Hippotragus_equinus
KHA	Oryx_gazella
KHA	Phacochoerus_africanus
KHA	Raphicerus_campestris
KHA	Redunca_arundinum
KHA	Sylvicapra_grimmia
KHA	Taurotragus_oryx
KHA	Tragelaphus_scriptus
KHA	Tragelaphus_strepsiceros
KIB	Cephalophus_callipygus
KIB	Cephalophus_dorsalis
KIB	Cephalophus_monticola
KIB	Cephalophus_nigrifrons
KIB	Damaliscus_lunatus
KIB	Equus_burchellii
KIB	Hippopotamus_amphibius
KIB	Hyemoschus_aquaticus
KIB	Hylochoerus_meinertzhageni
KIB	Kobus_ellipsiprymnus
KIB	Kobus_kob
KIB	Neotragus_batesi
KIB	Okapia_johnstoni
KIB	Oreotragus_oreotragus
KIB	Ourebia_ourebi
KIB	Phacochoerus_africanus
KIB	Potamochoerus_larvatus
KIB	Redunca_redunca
KIB	Sylvicapra_grimmia
KIB	Syncerus_caffer
KIB	Tragelaphus_scriptus
KIB	Tragelaphus_spekii
KID	Alcelaphus_buselaphus
KID	Diceros_bicornis
KID	Equus_burchellii
KID	Gazella_granti
KID	Giraffa_camelopardalis
KID	Hippotragus_equinus
KID	Kobus_ellipsiprymnus
KID	Madoqua_guentheri
KID	Madoqua_kirkii
KID	Oreotragus_oreotragus
KID	Ourebia_ourebi
KID	Phacochoerus_africanus
KID	Redunca_fulvorufula
KID	Redunca_redunca
KID	Syncerus_caffer
KID	Taurotragus_oryx
KID	Tragelaphus_imberbis
KID	Tragelaphus_scriptus
KID	Tragelaphus_strepsiceros
KILI	Cephalophus_natalensis
KILI	Cephalophus_spadix
KILI	Diceros_bicornis
KILI	Giraffa_camelopardalis
KILI	Neotragus_moschatus
KILI	Potamochoerus_larvatus
KILI	Syncerus_caffer
KILI	Taurotragus_oryx
KILI	Tragelaphus_scriptus
KIS	Cephalophus_monticola
KIS	Cephalophus_silvicultor
KIS	Hippotragus_equinus
KIS	Ourebia_ourebi
KIS	Phacochoerus_africanus
KIS	Potamochoerus_larvatus
KIS	Redunca_arundinum
KIS	Sylvicapra_grimmia
KIS	Tragelaphus_scriptus
KIZ	Aepyceros_melampus
KIZ	Cephalophus_monticola
KIZ	Damaliscus_lunatus
KIZ	Equus_burchellii
KIZ	Gazella_granti
KIZ	Giraffa_camelopardalis
KIZ	Hippotragus_equinus
KIZ	Hippotragus_niger
KIZ	Kobus_ellipsiprymnus
KIZ	Madoqua_kirkii
KIZ	Neotragus_moschatus
KIZ	Oreotragus_oreotragus
KIZ	Ourebia_ourebi
KIZ	Phacochoerus_africanus
KIZ	Potamochoerus_larvatus
KIZ	Raphicerus_campestris
KIZ	Raphicerus_sharpei
KIZ	Redunca_arundinum
KIZ	Redunca_redunca
KIZ	Sigmoceros_lichtensteinii
KIZ	Sylvicapra_grimmia
KIZ	Syncerus_caffer
KIZ	Taurotragus_oryx
KIZ	Tragelaphus_imberbis
KIZ	Tragelaphus_scriptus
KIZ	Tragelaphus_strepsiceros
KOR	Cephalophus_dorsalis
KOR	Cephalophus_monticola
KOR	Cephalophus_ogilbyi
KOR	Cephalophus_silvicultor
KOR	Hyemoschus_aquaticus
KOR	Potamochoerus_porcus
KOR	Syncerus_caffer
KOR	Tragelaphus_scriptus
KOR	Tragelaphus_spekii
KOU	Alcelaphus_buselaphus
KOU	Cephalophus_rufilatus
KOU	Damaliscus_lunatus
KOU	Gazella_rufifrons
KOU	Hippotragus_equinus
KOU	Kobus_ellipsiprymnus
KOU	Kobus_kob
KOU	Ourebia_ourebi
KOU	Phacochoerus_africanus
KOU	Redunca_redunca
KOU	Sylvicapra_grimmia
KOU	Syncerus_caffer
KOU	Tragelaphus_scriptus
LCHIL	Aepyceros_melampus
LCHIL	Cephalophus_monticola
LCHIL	Equus_burchellii
LCHIL	Hippopotamus_amphibius
LCHIL	Hippotragus_niger
LCHIL	Kobus_ellipsiprymnus
LCHIL	Neotragus_moschatus
LCHIL	Oreotragus_oreotragus
LCHIL	Phacochoerus_africanus
LCHIL	Potamochoerus_larvatus
LCHIL	Raphicerus_sharpei
LCHIL	Redunca_arundinum
LCHIL	Sigmoceros_lichtensteinii
LCHIL	Sylvicapra_grimmia
LCHIL	Syncerus_caffer
LCHIL	Taurotragus_oryx
LCHIL	Tragelaphus_scriptus
LCHIL	Tragelaphus_strepsiceros
LEF	Cephalophus_monticola
LEF	Cephalophus_silvicultor
LEF	Hippopotamus_amphibius
LEF	Hylochoerus_meinertzhageni
LEF	Kobus_ellipsiprymnus
LEF	Phacochoerus_africanus
LEF	Potamochoerus_porcus
LEF	Sylvicapra_grimmia
LEF	Syncerus_caffer
LEF	Tragelaphus_scriptus
LEF	Tragelaphus_spekii
LEN	Aepyceros_melampus
LEN	Equus_burchellii
LEN	Hippotragus_niger
LEN	Kobus_ellipsiprymnus
LEN	Neotragus_moschatus
LEN	Oreotragus_oreotragus
LEN	Phacochoerus_africanus
LEN	Potamochoerus_larvatus
LEN	Raphicerus_sharpei
LEN	Redunca_arundinum
LEN	Sigmoceros_lichtensteinii
LEN	Sylvicapra_grimmia
LEN	Syncerus_caffer
LEN	Taurotragus_oryx
LEN	Tragelaphus_angasii
LEN	Tragelaphus_scriptus
LEN	Tragelaphus_strepsiceros
LIN	Aepyceros_melampus
LIN	Connochaetes_taurinus
LIN	Damaliscus_lunatus
LIN	Equus_burchellii
LIN	Giraffa_camelopardalis
LIN	Hippopotamus_amphibius
LIN	Hippotragus_equinus
LIN	Hippotragus_niger
LIN	Kobus_ellipsiprymnus
LIN	Kobus_leche
LIN	Kobus_vardonii
LIN	Phacochoerus_africanus
LIN	Raphicerus_campestris
LIN	Redunca_arundinum
LIN	Sylvicapra_grimmia
LIN	Syncerus_caffer
LIN	Taurotragus_oryx
LIN	Tragelaphus_scriptus
LIN	Tragelaphus_spekii
LIW	Aepyceros_melampus
LIW	Diceros_bicornis
LIW	Equus_burchellii
LIW	Hippopotamus_amphibius
LIW	Hippotragus_niger
LIW	Kobus_ellipsiprymnus
LIW	Oreotragus_oreotragus
LIW	Ourebia_ourebi
LIW	Phacochoerus_africanus
LIW	Potamochoerus_larvatus
LIW	Redunca_arundinum
LIW	Sigmoceros_lichtensteinii
LIW	Sylvicapra_grimmia
LIW	Syncerus_caffer
LIW	Tragelaphus_scriptus
LIW	Tragelaphus_strepsiceros
LMAG	Aepyceros_melampus
LMAG	Alcelaphus_buselaphus
LMAG	Connochaetes_taurinus
LMAG	Diceros_bicornis
LMAG	Equus_burchellii
LMAG	Gazella_granti
LMAG	Giraffa_camelopardalis
LMAG	Litocranius_walleri
LMAG	Madoqua_kirkii
LMAG	Oreotragus_oreotragus
LMAG	Oryx_gazella
LMAG	Phacochoerus_africanus
LMAG	Raphicerus_campestris
LMAG	Sylvicapra_grimmia
LMNY	Aepyceros_melampus
LMNY	Alcelaphus_buselaphus
LMNY	Cephalophus_natalensis
LMNY	Diceros_bicornis
LMNY	Equus_burchellii
LMNY	Giraffa_camelopardalis
LMNY	Hippopotamus_amphibius
LMNY	Kobus_ellipsiprymnus
LMNY	Madoqua_kirkii
LMNY	Neotragus_moschatus
LMNY	Oreotragus_oreotragus
LMNY	Phacochoerus_africanus
LMNY	Redunca_redunca
LMNY	Sylvicapra_grimmia
LMNY	Syncerus_caffer
LMNY	Tragelaphus_scriptus
LNAK	Aepyceros_melampus
LNAK	Equus_burchellii
LNAK	Gazella_granti
LNAK	Gazella_thomsonii
LNAK	Hippopotamus_amphibius
LNAK	Kobus_ellipsiprymnus
LNAK	Madoqua_kirkii
LNAK	Oreotragus_oreotragus
LNAK	Raphicerus_campestris
LNAK	Redunca_fulvorufula
LNAK	Redunca_redunca
LNAK	Sylvicapra_grimmia
LNAK	Taurotragus_oryx
LNAK	Tragelaphus_scriptus
LNHG	Aepyceros_melampus
LNHG	Alcelaphus_buselaphus
LNHG	Equus_burchellii
LNHG	Gazella_granti
LNHG	Gazella_thomsonii
LNHG	Giraffa_camelopardalis
LNHG	Hippopotamus_amphibius
LNHG	Kobus_ellipsiprymnus
LNHG	Madoqua_kirkii
LNHG	Oreotragus_oreotragus
LNHG	Raphicerus_campestris
LNHG	Redunca_fulvorufula
LNHG	Redunca_redunca
LNHG	Sylvicapra_grimmia
LNHG	Syncerus_caffer
LNHG	Tragelaphus_scriptus
LOP	Cephalophus_callipygus
LOP	Cephalophus_dorsalis
LOP	Cephalophus_leucogaster
LOP	Cephalophus_monticola
LOP	Cephalophus_nigrifrons
LOP	Cephalophus_ogilbyi
LOP	Cephalophus_silvicultor
LOP	Hyemoschus_aquaticus
LOP	Neotragus_batesi
LOP	Potamochoerus_porcus
LOP	Syncerus_caffer
LOP	Tragelaphus_scriptus
LOP	Tragelaphus_spekii
LTCR	Cephalophus_callipygus
LTCR	Cephalophus_dorsalis
LTCR	Cephalophus_leucogaster
LTCR	Cephalophus_monticola
LTCR	Cephalophus_nigrifrons
LTCR	Cephalophus_silvicultor
LTCR	Hyemoschus_aquaticus
LTCR	Hylochoerus_meinertzhageni
LTCR	Neotragus_batesi
LTCR	Potamochoerus_porcus
LTCR	Syncerus_caffer
LTCR	Tragelaphus_eurycerus
LTCR	Tragelaphus_spekii
LUA	Cephalophus_monticola
LUA	Cephalophus_silvicultor
LUA	Connochaetes_taurinus
LUA	Damaliscus_lunatus
LUA	Hippotragus_equinus
LUA	Hippotragus_niger
LUA	Kobus_ellipsiprymnus
LUA	Kobus_leche
LUA	Ourebia_ourebi
LUA	Potamochoerus_larvatus
LUA	Redunca_arundinum
LUA	Sylvicapra_grimmia
LUA	Syncerus_caffer
LUA	Taurotragus_oryx
LUA	Tragelaphus_scriptus
LUA	Tragelaphus_spekii
LUA	Tragelaphus_strepsiceros
MAD	Alcelaphus_buselaphus
MAD	Cephalophus_rufilatus
MAD	Damaliscus_lunatus
MAD	Gazella_rufifrons
MAD	Hippotragus_equinus
MAD	Kobus_ellipsiprymnus
MAD	Kobus_kob
MAD	Ourebia_ourebi
MAD	Phacochoerus_africanus
MAD	Redunca_redunca
MAD	Sylvicapra_grimmia
MAD	Syncerus_caffer
MAD	Tragelaphus_scriptus
MAGO	Alcelaphus_buselaphus
MAGO	Damaliscus_lunatus
MAGO	Equus_burchellii
MAGO	Equus_grevyi
MAGO	Gazella_granti
MAGO	Giraffa_camelopardalis
MAGO	Hippopotamus_amphibius
MAGO	Kobus_ellipsiprymnus
MAGO	Litocranius_walleri
MAGO	Madoqua_guentheri
MAGO	Oreotragus_oreotragus
MAGO	Oryx_gazella
MAGO	Ourebia_ourebi
MAGO	Phacochoerus_africanus
MAGO	Potamochoerus_larvatus
MAGO	Redunca_fulvorufula
MAGO	Redunca_redunca
MAGO	Sylvicapra_grimmia
MAGO	Syncerus_caffer
MAGO	Taurotragus_oryx
MAGO	Tragelaphus_imberbis
MAGO	Tragelaphus_scriptus
MAGO	Tragelaphus_strepsiceros
MAH	Alcelaphus_buselaphus
MAH	Cephalophus_callipygus
MAH	Cephalophus_monticola
MAH	Damaliscus_lunatus
MAH	Diceros_bicornis
MAH	Equus_burchellii
MAH	Giraffa_camelopardalis
MAH	Hippopotamus_amphibius
MAH	Hippotragus_equinus
MAH	Hippotragus_niger
MAH	Kobus_ellipsiprymnus
MAH	Oreotragus_oreotragus
MAH	Phacochoerus_africanus
MAH	Potamochoerus_larvatus
MAH	Sylvicapra_grimmia
MAH	Syncerus_caffer
MAH	Taurotragus_oryx
MAH	Tragelaphus_scriptus
MAJ	Aepyceros_melampus
MAJ	Cephalophus_monticola
MAJ	Equus_burchellii
MAJ	Hippotragus_niger
MAJ	Kobus_ellipsiprymnus
MAJ	Neotragus_moschatus
MAJ	Oreotragus_oreotragus
MAJ	Phacochoerus_africanus
MAJ	Potamochoerus_larvatus
MAJ	Raphicerus_sharpei
MAJ	Redunca_arundinum
MAJ	Sigmoceros_lichtensteinii
MAJ	Sylvicapra_grimmia
MAJ	Syncerus_caffer
MAJ	Taurotragus_oryx
MAJ	Tragelaphus_scriptus
MAJ	Tragelaphus_strepsiceros
MAK	Cephalophus_callipygus
MAK	Cephalophus_dorsalis
MAK	Cephalophus_leucogaster
MAK	Cephalophus_monticola
MAK	Cephalophus_nigrifrons
MAK	Cephalophus_silvicultor
MAK	Hippopotamus_amphibius
MAK	Hyemoschus_aquaticus
MAK	Hylochoerus_meinertzhageni
MAK	Potamochoerus_porcus
MAK	Redunca_arundinum
MAK	Syncerus_caffer
MAK	Tragelaphus_eurycerus
MAK	Tragelaphus_spekii
MAM	Aepyceros_melampus
MAM	Connochaetes_taurinus
MAM	Damaliscus_lunatus
MAM	Equus_burchellii
MAM	Giraffa_camelopardalis
MAM	Hippotragus_equinus
MAM	Hippotragus_niger
MAM	Kobus_ellipsiprymnus
MAM	Kobus_leche
MAM	Phacochoerus_africanus
MAM	Potamochoerus_larvatus
MAM	Raphicerus_campestris
MAM	Redunca_arundinum
MAM	Sylvicapra_grimmia
MAM	Syncerus_caffer
MAM	Taurotragus_oryx
MAM	Tragelaphus_scriptus
MAM	Tragelaphus_spekii
MAM	Tragelaphus_strepsiceros
MAN	Aepyceros_melampus
MAN	Equus_burchellii
MAN	Hippopotamus_amphibius
MAN	Hippotragus_equinus
MAN	Hippotragus_niger
MAN	Kobus_ellipsiprymnus
MAN	Kobus_vardonii
MAN	Neotragus_moschatus
MAN	Oreotragus_oreotragus
MAN	Ourebia_ourebi
MAN	Phacochoerus_africanus
MAN	Potamochoerus_larvatus
MAN	Raphicerus_sharpei
MAN	Sigmoceros_lichtensteinii
MAN	Sylvicapra_grimmia
MAN	Syncerus_caffer
MAN	Taurotragus_oryx
MAN	Tragelaphus_angasii
MAN	Tragelaphus_scriptus
MAN	Tragelaphus_spekii
MAN	Tragelaphus_strepsiceros
MAND	Alcelaphus_buselaphus
MAND	Cephalophus_rufilatus
MAND	Cephalophus_silvicultor
MAND	Damaliscus_lunatus
MAND	Gazella_rufifrons
MAND	Hippotragus_equinus
MAND	Kobus_ellipsiprymnus
MAND	Kobus_kob
MAND	Ourebia_ourebi
MAND	Phacochoerus_africanus
MAND	Potamochoerus_porcus
MAND	Sylvicapra_grimmia
MAND	Syncerus_caffer
MAND	Taurotragus_derbianus
MAND	Tragelaphus_scriptus
MAP	Aepyceros_melampus
MAP	Equus_burchellii
MAP	Hippopotamus_amphibius
MAP	Neotragus_moschatus
MAP	Oreotragus_oreotragus
MAP	Phacochoerus_africanus
MAP	Potamochoerus_larvatus
MAP	Raphicerus_campestris
MAP	Redunca_arundinum
MAP	Sylvicapra_grimmia
MAP	Tragelaphus_angasii
MAP	Tragelaphus_scriptus
MAP	Tragelaphus_strepsiceros
MARE	Alcelaphus_buselaphus
MARE	Cephalophus_rufilatus
MARE	Hippopotamus_amphibius
MARE	Hippotragus_equinus
MARE	Kobus_ellipsiprymnus
MARE	Kobus_kob
MARE	Ourebia_ourebi
MARE	Phacochoerus_africanus
MARE	Redunca_redunca
MARE	Sylvicapra_grimmia
MARE	Tragelaphus_scriptus
MARO	Cephalophus_monticola
MARO	Connochaetes_taurinus
MARO	Equus_burchellii
MARO	Hippopotamus_amphibius
MARO	Hippotragus_niger
MARO	Kobus_ellipsiprymnus
MARO	Neotragus_moschatus
MARO	Ourebia_ourebi
MARO	Phacochoerus_africanus
MARO	Potamochoerus_larvatus
MARO	Raphicerus_sharpei
MARO	Redunca_arundinum
MARO	Sigmoceros_lichtensteinii
MARO	Sylvicapra_grimmia
MARO	Syncerus_caffer
MARO	Taurotragus_oryx
MARO	Tragelaphus_scriptus
MARS	Diceros_bicornis
MARS	Equus_grevyi
MARS	Gazella_granti
MARS	Giraffa_camelopardalis
MARS	Litocranius_walleri
MARS	Madoqua_guentheri
MARS	Neotragus_moschatus
MARS	Oreotragus_oreotragus
MARS	Oryx_gazella
MARS	Phacochoerus_aethiopicus
MARS	Sylvicapra_grimmia
MARS	Syncerus_caffer
MARS	Tragelaphus_imberbis
MARS	Tragelaphus_scriptus
MARS	Tragelaphus_strepsiceros
MASF	Cephalophus_maxwellii
MASF	Cephalophus_niger
MASF	Cephalophus_ogilbyi
MASF	Cephalophus_rufilatus
MASF	Cephalophus_silvicultor
MASF	Hylochoerus_meinertzhageni
MASF	Neotragus_pygmaeus
MASF	Potamochoerus_porcus
MASF	Sylvicapra_grimmia
MASF	Tragelaphus_eurycerus
MASF	Tragelaphus_scriptus
MASM	Aepyceros_melampus
MASM	Alcelaphus_buselaphus
MASM	Cephalophus_monticola
MASM	Cephalophus_natalensis
MASM	Connochaetes_taurinus
MASM	Damaliscus_lunatus
MASM	Diceros_bicornis
MASM	Equus_burchellii
MASM	Gazella_granti
MASM	Gazella_thomsonii
MASM	Giraffa_camelopardalis
MASM	Hippopotamus_amphibius
MASM	Hippotragus_equinus
MASM	Hylochoerus_meinertzhageni
MASM	Kobus_ellipsiprymnus
MASM	Madoqua_kirkii
MASM	Neotragus_moschatus
MASM	Oreotragus_oreotragus
MASM	Ourebia_ourebi
MASM	Phacochoerus_africanus
MASM	Potamochoerus_larvatus
MASM	Raphicerus_campestris
MASM	Redunca_redunca
MASM	Sylvicapra_grimmia
MASM	Syncerus_caffer
MASM	Taurotragus_oryx
MASM	Tragelaphus_scriptus
MAT	Aepyceros_melampus
MAT	Equus_burchellii
MAT	Hippopotamus_amphibius
MAT	Hippotragus_equinus
MAT	Hippotragus_niger
MAT	Kobus_ellipsiprymnus
MAT	Oreotragus_oreotragus
MAT	Phacochoerus_africanus
MAT	Potamochoerus_larvatus
MAT	Raphicerus_campestris
MAT	Raphicerus_sharpei
MAT	Sylvicapra_grimmia
MAT	Syncerus_caffer
MAT	Taurotragus_oryx
MAT	Tragelaphus_scriptus
MAT	Tragelaphus_strepsiceros
MATO	Aepyceros_melampus
MATO	Ceratotherium_simum
MATO	Connochaetes_taurinus
MATO	Damaliscus_lunatus
MATO	Diceros_bicornis
MATO	Equus_burchellii
MATO	Hippotragus_niger
MATO	Kobus_ellipsiprymnus
MATO	Oreotragus_oreotragus
MATO	Phacochoerus_africanus
MATO	Potamochoerus_larvatus
MATO	Raphicerus_campestris
MATO	Raphicerus_sharpei
MATO	Redunca_arundinum
MATO	Sylvicapra_grimmia
MATO	Tragelaphus_scriptus
MATO	Tragelaphus_strepsiceros
MAV	Connochaetes_taurinus
MAV	Damaliscus_lunatus
MAV	Equus_burchellii
MAV	Giraffa_camelopardalis
MAV	Hippotragus_equinus
MAV	Kobus_ellipsiprymnus
MAV	Kobus_leche
MAV	Oreotragus_oreotragus
MAV	Ourebia_ourebi
MAV	Phacochoerus_africanus
MAV	Raphicerus_campestris
MAV	Redunca_arundinum
MAV	Sylvicapra_grimmia
MAV	Syncerus_caffer
MAV	Taurotragus_oryx
MAV	Tragelaphus_scriptus
MAV	Tragelaphus_spekii
MAV	Tragelaphus_strepsiceros
MED	Alcelaphus_buselaphus
MED	Cephalophus_monticola
MED	Cephalophus_rufilatus
MED	Cephalophus_silvicultor
MED	Hylochoerus_meinertzhageni
MED	Kobus_ellipsiprymnus
MED	Kobus_kob
MED	Neotragus_batesi
MED	Ourebia_ourebi
MED	Phacochoerus_africanus
MED	Potamochoerus_porcus
MED	Redunca_redunca
MED	Sylvicapra_grimmia
MED	Syncerus_caffer
MED	Tragelaphus_scriptus
MED	Tragelaphus_spekii
MER	Aepyceros_melampus
MER	Alcelaphus_buselaphus
MER	Cephalophus_monticola
MER	Ceratotherium_simum
MER	Diceros_bicornis
MER	Equus_burchellii
MER	Equus_grevyi
MER	Gazella_granti
MER	Giraffa_camelopardalis
MER	Hippopotamus_amphibius
MER	Litocranius_walleri
MER	Madoqua_kirkii
MER	Neotragus_moschatus
MER	Oryx_gazella
MER	Ourebia_ourebi
MER	Phacochoerus_aethiopicus
MER	Potamochoerus_larvatus
MER	Raphicerus_campestris
MER	Redunca_redunca
MER	Sylvicapra_grimmia
MER	Syncerus_caffer
MER	Taurotragus_oryx
MER	Tragelaphus_imberbis
MER	Tragelaphus_scriptus
MGSF	Alcelaphus_buselaphus
MGSF	Cephalophus_monticola
MGSF	Cephalophus_rufilatus
MGSF	Cephalophus_silvicultor
MGSF	Damaliscus_lunatus
MGSF	Diceros_bicornis
MGSF	Gazella_rufifrons
MGSF	Giraffa_camelopardalis
MGSF	Hippopotamus_amphibius
MGSF	Hippotragus_equinus
MGSF	Hylochoerus_meinertzhageni
MGSF	Kobus_ellipsiprymnus
MGSF	Kobus_kob
MGSF	Oreotragus_oreotragus
MGSF	Ourebia_ourebi
MGSF	Phacochoerus_africanus
MGSF	Potamochoerus_porcus
MGSF	Redunca_redunca
MGSF	Sylvicapra_grimmia
MGSF	Syncerus_caffer
MGSF	Taurotragus_derbianus
MGSF	Tragelaphus_scriptus
MHA	Cephalophus_callipygus
MHA	Cephalophus_dorsalis
MHA	Cephalophus_leucogaster
MHA	Cephalophus_monticola
MHA	Cephalophus_nigrifrons
MHA	Cephalophus_silvicultor
MHA	Hyemoschus_aquaticus
MHA	Neotragus_batesi
MHA	Potamochoerus_larvatus
MHA	Tragelaphus_spekii
MIKU	Aepyceros_melampus
MIKU	Cephalophus_natalensis
MIKU	Connochaetes_taurinus
MIKU	Diceros_bicornis
MIKU	Equus_burchellii
MIKU	Giraffa_camelopardalis
MIKU	Hippopotamus_amphibius
MIKU	Hippotragus_niger
MIKU	Kobus_ellipsiprymnus
MIKU	Phacochoerus_africanus
MIKU	Redunca_redunca
MIKU	Sylvicapra_grimmia
MIKU	Syncerus_caffer
MIKU	Tragelaphus_scriptus
MIKU	Tragelaphus_strepsiceros
MNDL	Alcelaphus_buselaphus
MNDL	Damaliscus_lunatus
MNDL	Gazella_rufifrons
MNDL	Giraffa_camelopardalis
MNDL	Hippotragus_equinus
MNDL	Kobus_ellipsiprymnus
MNDL	Kobus_kob
MNDL	Ourebia_ourebi
MNDL	Phacochoerus_africanus
MNDL	Redunca_redunca
MNDL	Sylvicapra_grimmia
MNDL	Syncerus_caffer
MNDL	Tragelaphus_scriptus
MNDL	Tragelaphus_spekii
MNIM	Cephalophus_dorsalis
MNIM	Cephalophus_maxwellii
MNIM	Cephalophus_niger
MNIM	Cephalophus_ogilbyi
MNIM	Cephalophus_rufilatus
MNIM	Cephalophus_silvicultor
MNIM	Hippopotamus_amphibius
MNIM	Hylochoerus_meinertzhageni
MNIM	Neotragus_pygmaeus
MNIM	Phacochoerus_africanus
MNIM	Potamochoerus_porcus
MNIM	Sylvicapra_grimmia
MNIM	Tragelaphus_eurycerus
MNIM	Tragelaphus_scriptus
MOC	Aepyceros_melampus
MOC	Antidorcas_marsupialis
MOC	Equus_burchellii
MOC	Madoqua_kirkii
MOC	Oreotragus_oreotragus
MOC	Oryx_gazella
MOC	Phacochoerus_africanus
MOC	Raphicerus_campestris
MOC	Sylvicapra_grimmia
MOC	Tragelaphus_strepsiceros
MTAS	Alcelaphus_buselaphus
MTAS	Cephalophus_rufilatus
MTAS	Cephalophus_silvicultor
MTAS	Hippopotamus_amphibius
MTAS	Hippotragus_equinus
MTAS	Kobus_ellipsiprymnus
MTAS	Kobus_kob
MTAS	Ourebia_ourebi
MTAS	Phacochoerus_africanus
MTAS	Potamochoerus_porcus
MTAS	Redunca_redunca
MTAS	Sylvicapra_grimmia
MTAS	Syncerus_caffer
MTAS	Taurotragus_derbianus
MTAS	Tragelaphus_scriptus
MTE	Cephalophus_nigrifrons
MTE	Diceros_bicornis
MTE	Hylochoerus_meinertzhageni
MTE	Neotragus_moschatus
MTE	Potamochoerus_larvatus
MTE	Sylvicapra_grimmia
MTE	Syncerus_caffer
MTE	Tragelaphus_scriptus
MTFO	Cephalophus_callipygus
MTFO	Cephalophus_leucogaster
MTFO	Cephalophus_monticola
MTFO	Cephalophus_silvicultor
MTFO	Hippopotamus_amphibius
MTFO	Hyemoschus_aquaticus
MTFO	Kobus_ellipsiprymnus
MTFO	Potamochoerus_porcus
MTFO	Redunca_arundinum
MTFO	Syncerus_caffer
MTFO	Tragelaphus_scriptus
MTFO	Tragelaphus_spekii
MUD	Aepyceros_melampus
MUD	Connochaetes_taurinus
MUD	Damaliscus_lunatus
MUD	Equus_burchellii
MUD	Giraffa_camelopardalis
MUD	Hippopotamus_amphibius
MUD	Hippotragus_niger
MUD	Kobus_ellipsiprymnus
MUD	Kobus_leche
MUD	Phacochoerus_africanus
MUD	Potamochoerus_larvatus
MUD	Raphicerus_campestris
MUD	Redunca_arundinum
MUD	Sylvicapra_grimmia
MUD	Syncerus_caffer
MUD	Taurotragus_oryx
MUD	Tragelaphus_scriptus
MUD	Tragelaphus_spekii
MUD	Tragelaphus_strepsiceros
MUPA	Aepyceros_melampus
MUPA	Alcelaphus_buselaphus
MUPA	Connochaetes_taurinus
MUPA	Equus_burchellii
MUPA	Giraffa_camelopardalis
MUPA	Hippopotamus_amphibius
MUPA	Kobus_ellipsiprymnus
MUPA	Oreotragus_oreotragus
MUPA	Oryx_gazella
MUPA	Ourebia_ourebi
MUPA	Phacochoerus_africanus
MUPA	Potamochoerus_larvatus
MUPA	Raphicerus_campestris
MUPA	Redunca_redunca
MUPA	Sylvicapra_grimmia
MUPA	Syncerus_caffer
MUPA	Taurotragus_oryx
MUPA	Tragelaphus_scriptus
MUPA	Tragelaphus_strepsiceros
MUSH	Aepyceros_melampus
MUSH	Damaliscus_lunatus
MUSH	Equus_burchellii
MUSH	Hippotragus_niger
MUSH	Kobus_ellipsiprymnus
MUSH	Oreotragus_oreotragus
MUSH	Ourebia_ourebi
MUSH	Phacochoerus_africanus
MUSH	Potamochoerus_larvatus
MUSH	Raphicerus_campestris
MUSH	Raphicerus_sharpei
MUSH	Redunca_arundinum
MUSH	Sylvicapra_grimmia
MUSH	Tragelaphus_scriptus
MUSH	Tragelaphus_strepsiceros
MWA	Aepyceros_melampus
MWA	Cephalophus_monticola
MWA	Cephalophus_silvicultor
MWA	Equus_burchellii
MWA	Hippopotamus_amphibius
MWA	Hippotragus_equinus
MWA	Hippotragus_niger
MWA	Kobus_ellipsiprymnus
MWA	Kobus_vardonii
MWA	Oreotragus_oreotragus
MWA	Phacochoerus_africanus
MWA	Potamochoerus_larvatus
MWA	Redunca_arundinum
MWA	Sigmoceros_lichtensteinii
MWA	Sylvicapra_grimmia
MWA	Syncerus_caffer
MWA	Taurotragus_oryx
MWA	Tragelaphus_scriptus
MWA	Tragelaphus_spekii
MWAB	Aepyceros_melampus
MWAB	Equus_burchellii
MWAB	Hippopotamus_amphibius
MWAB	Hippotragus_niger
MWAB	Kobus_ellipsiprymnus
MWAB	Neotragus_moschatus
MWAB	Oreotragus_oreotragus
MWAB	Ourebia_ourebi
MWAB	Phacochoerus_africanus
MWAB	Potamochoerus_larvatus
MWAB	Raphicerus_sharpei
MWAB	Redunca_arundinum
MWAB	Sylvicapra_grimmia
MWAB	Syncerus_caffer
MWAB	Taurotragus_oryx
MWAB	Tragelaphus_angasii
MWAB	Tragelaphus_scriptus
MWAB	Tragelaphus_strepsiceros
NAI	Aepyceros_melampus
NAI	Alcelaphus_buselaphus
NAI	Connochaetes_taurinus
NAI	Diceros_bicornis
NAI	Gazella_granti
NAI	Gazella_thomsonii
NAI	Giraffa_camelopardalis
NAI	Hippopotamus_amphibius
NAI	Kobus_ellipsiprymnus
NAI	Madoqua_kirkii
NAI	Neotragus_moschatus
NAI	Oreotragus_oreotragus
NAI	Phacochoerus_africanus
NAI	Raphicerus_campestris
NAI	Redunca_fulvorufula
NAI	Redunca_redunca
NAI	Sylvicapra_grimmia
NAI	Syncerus_caffer
NAI	Taurotragus_oryx
NAI	Tragelaphus_scriptus
NAM	Antidorcas_marsupialis
NAM	Equus_zebra
NAM	Oreotragus_oreotragus
NAM	Oryx_gazella
NAT	Cephalophus_natalensis
NAT	Kobus_ellipsiprymnus
NAT	Neotragus_moschatus
NAT	Oreotragus_oreotragus
NAT	Ourebia_ourebi
NAT	Pelea_capreolus
NAT	Potamochoerus_larvatus
NAT	Raphicerus_sharpei
NAT	Redunca_arundinum
NAT	Redunca_fulvorufula
NAT	Sylvicapra_grimmia
NAT	Tragelaphus_scriptus
NAUK	Antidorcas_marsupialis
NAUK	Equus_zebra
NAUK	Madoqua_kirkii
NAUK	Oreotragus_oreotragus
NAUK	Oryx_gazella
NAUK	Phacochoerus_africanus
NAUK	Raphicerus_campestris
NAUK	Sylvicapra_grimmia
NAUK	Tragelaphus_strepsiceros
NGCR	Aepyceros_melampus
NGCR	Connochaetes_taurinus
NGCR	Diceros_bicornis
NGCR	Equus_burchellii
NGCR	Gazella_granti
NGCR	Gazella_thomsonii
NGCR	Giraffa_camelopardalis
NGCR	Hippopotamus_amphibius
NGCR	Hylochoerus_meinertzhageni
NGCR	Kobus_ellipsiprymnus
NGCR	Oreotragus_oreotragus
NGCR	Phacochoerus_africanus
NGCR	Redunca_redunca
NGCR	Sylvicapra_grimmia
NGCR	Syncerus_caffer
NGCR	Taurotragus_oryx
NGCR	Tragelaphus_scriptus
NGO	Cephalophus_callipygus
NGO	Cephalophus_dorsalis
NGO	Cephalophus_leucogaster
NGO	Cephalophus_monticola
NGO	Cephalophus_nigrifrons
NGO	Cephalophus_rufilatus
NGO	Cephalophus_silvicultor
NGO	Hippopotamus_amphibius
NGO	Hylochoerus_meinertzhageni
NGO	Kobus_ellipsiprymnus
NGO	Neotragus_batesi
NGO	Phacochoerus_africanus
NGO	Potamochoerus_porcus
NGO	Redunca_redunca
NGO	Syncerus_caffer
NGO	Tragelaphus_eurycerus
NGO	Tragelaphus_scriptus
NGO	Tragelaphus_spekii
NIA	Aepyceros_melampus
NIA	Connochaetes_taurinus
NIA	Equus_burchellii
NIA	Hippopotamus_amphibius
NIA	Hippotragus_niger
NIA	Kobus_ellipsiprymnus
NIA	Neotragus_moschatus
NIA	Oreotragus_oreotragus
NIA	Phacochoerus_africanus
NIA	Potamochoerus_larvatus
NIA	Raphicerus_sharpei
NIA	Redunca_arundinum
NIA	Redunca_redunca
NIA	Sigmoceros_lichtensteinii
NIA	Sylvicapra_grimmia
NIA	Syncerus_caffer
NIA	Taurotragus_oryx
NIA	Tragelaphus_scriptus
NIA	Tragelaphus_strepsiceros
NKK	Aepyceros_melampus
NKK	Cephalophus_monticola
NKK	Equus_burchellii
NKK	Hippopotamus_amphibius
NKK	Hippotragus_equinus
NKK	Hippotragus_niger
NKK	Kobus_ellipsiprymnus
NKK	Oreotragus_oreotragus
NKK	Ourebia_ourebi
NKK	Phacochoerus_africanus
NKK	Potamochoerus_larvatus
NKK	Raphicerus_sharpei
NKK	Redunca_arundinum
NKK	Sigmoceros_lichtensteinii
NKK	Sylvicapra_grimmia
NKK	Syncerus_caffer
NKK	Taurotragus_oryx
NKK	Tragelaphus_scriptus
NKK	Tragelaphus_strepsiceros
NOU	Cephalophus_callipygus
NOU	Cephalophus_dorsalis
NOU	Cephalophus_leucogaster
NOU	Cephalophus_monticola
NOU	Cephalophus_nigrifrons
NOU	Cephalophus_silvicultor
NOU	Hyemoschus_aquaticus
NOU	Hylochoerus_meinertzhageni
NOU	Neotragus_batesi
NOU	Potamochoerus_porcus
NOU	Syncerus_caffer
NOU	Tragelaphus_eurycerus
NOU	Tragelaphus_spekii
NYG	Cephalophus_monticola
NYG	Cephalophus_silvicultor
NYG	Gazella_thomsonii
NYG	Hippopotamus_amphibius
NYG	Hyemoschus_aquaticus
NYG	Kobus_ellipsiprymnus
NYG	Potamochoerus_porcus
NYG	Redunca_arundinum
NYG	Syncerus_caffer
NYG	Tragelaphus_scriptus
NYG	Tragelaphus_spekii
NYK	Cephalophus_monticola
NYK	Cephalophus_natalensis
NYK	Equus_burchellii
NYK	Hippotragus_niger
NYK	Kobus_vardonii
NYK	Oreotragus_oreotragus
NYK	Phacochoerus_africanus
NYK	Potamochoerus_larvatus
NYK	Redunca_arundinum
NYK	Sigmoceros_lichtensteinii
NYK	Sylvicapra_grimmia
NYK	Syncerus_caffer
NYK	Taurotragus_oryx
NYK	Tragelaphus_scriptus
NYU	Aepyceros_melampus
NYU	Cephalophus_monticola
NYU	Cephalophus_nigrifrons
NYU	Cephalophus_weynsi
NYU	Equus_burchellii
NYU	Hyemoschus_aquaticus
NYU	Hylochoerus_meinertzhageni
NYU	Kobus_ellipsiprymnus
NYU	Oreotragus_oreotragus
NYU	Ourebia_ourebi
NYU	Phacochoerus_africanus
NYU	Potamochoerus_larvatus
NYU	Redunca_redunca
NYU	Sylvicapra_grimmia
NYU	Syncerus_caffer
NYU	Taurotragus_oryx
NYU	Tragelaphus_scriptus
NYU	Tragelaphus_spekii
ODZ	Cephalophus_callipygus
ODZ	Cephalophus_dorsalis
ODZ	Cephalophus_leucogaster
ODZ	Cephalophus_monticola
ODZ	Cephalophus_nigrifrons
ODZ	Cephalophus_silvicultor
ODZ	Hyemoschus_aquaticus
ODZ	Hylochoerus_meinertzhageni
ODZ	Neotragus_batesi
ODZ	Potamochoerus_porcus
ODZ	Sylvicapra_grimmia
ODZ	Syncerus_caffer
[truncated: 678 more rows]

## Sheet: SpeciesSummary
Order	Family	Species	Occurrences
Artiodactyla	Bovidae	Addax nasomaculatus	5
Artiodactyla	Bovidae	Aepyceros melampus	69
Artiodactyla	Bovidae	Alcelaphus buselaphus	56
Artiodactyla	Bovidae	Ammotragus lervia	4
Artiodactyla	Bovidae	Antidorcas marsupialis	15
Artiodactyla	Bovidae	Capra nubiana	2
Artiodactyla	Bovidae	Capra walie	1
Artiodactyla	Bovidae	Cephalophus callipygus	15
Artiodactyla	Bovidae	Cephalophus dorsalis	19
Artiodactyla	Bovidae	Cephalophus jentinki	1
Artiodactyla	Bovidae	Cephalophus leucogaster	13
Artiodactyla	Bovidae	Cephalophus maxwellii	7
Artiodactyla	Bovidae	Cephalophus monticola	67
Artiodactyla	Bovidae	Cephalophus natalensis	14
Artiodactyla	Bovidae	Cephalophus niger	5
Artiodactyla	Bovidae	Cephalophus nigrifrons	23
Artiodactyla	Bovidae	Cephalophus ogilbyi	6
Artiodactyla	Bovidae	Cephalophus rufilatus	28
Artiodactyla	Bovidae	Cephalophus silvicultor	43
Artiodactyla	Bovidae	Cephalophus spadix	2
Artiodactyla	Bovidae	Cephalophus weynsi	6
Artiodactyla	Bovidae	Cephalophus zebra	1
Artiodactyla	Bovidae	Connochaetes gnou	2
Artiodactyla	Bovidae	Connochaetes taurinus	41
Artiodactyla	Bovidae	Damaliscus hunteri	2
Artiodactyla	Bovidae	Damaliscus lunatus	56
Artiodactyla	Bovidae	Damaliscus pygargus	3
Artiodactyla	Bovidae	Gazella cuvieri	9
Artiodactyla	Bovidae	Gazella dama	5
Artiodactyla	Bovidae	Gazella dorcas	22
Artiodactyla	Bovidae	Gazella granti	21
Artiodactyla	Bovidae	Gazella leptoceros	6
Artiodactyla	Bovidae	Gazella rufifrons	29
Artiodactyla	Bovidae	Gazella soemmerringii	3
Artiodactyla	Bovidae	Gazella spekei	1
Artiodactyla	Bovidae	Gazella thomsonii	11
Artiodactyla	Bovidae	Hippotragus equinus	71
Artiodactyla	Bovidae	Hippotragus niger	43
Artiodactyla	Bovidae	Kobus ellipsiprymnus	116
Artiodactyla	Bovidae	Kobus kob	38
Artiodactyla	Bovidae	Kobus leche	13
Artiodactyla	Bovidae	Kobus megaceros	1
Artiodactyla	Bovidae	Kobus vardonii	16
Artiodactyla	Bovidae	Litocranius walleri	10
Artiodactyla	Bovidae	Madoqua guentheri	4
Artiodactyla	Bovidae	Madoqua kirkii	27
Artiodactyla	Bovidae	Madoqua saltiana	3
Artiodactyla	Bovidae	Neotragus batesi	12
Artiodactyla	Bovidae	Neotragus moschatus	30
Artiodactyla	Bovidae	Neotragus pygmaeus	4
Artiodactyla	Bovidae	Oreotragus oreotragus	79
Artiodactyla	Bovidae	Oryx gazella	32
Artiodactyla	Bovidae	Ourebia ourebi	79
Artiodactyla	Bovidae	Pelea capreolus	5
Artiodactyla	Bovidae	Raphicerus campestris	51
Artiodactyla	Bovidae	Raphicerus sharpei	29
Artiodactyla	Bovidae	Redunca arundinum	49
Artiodactyla	Bovidae	Redunca fulvorufula	15
Artiodactyla	Bovidae	Redunca redunca	73
Artiodactyla	Bovidae	Sigmoceros lichtensteinii	32
Artiodactyla	Bovidae	Sylvicapra grimmia	146
Artiodactyla	Bovidae	Syncerus caffer	130
Artiodactyla	Bovidae	Taurotragus derbianus	8
Artiodactyla	Bovidae	Taurotragus oryx	72
Artiodactyla	Bovidae	Tragelaphus angasii	11
Artiodactyla	Bovidae	Tragelaphus buxtoni	1
Artiodactyla	Bovidae	Tragelaphus eurycerus	16
Artiodactyla	Bovidae	Tragelaphus imberbis	13
Artiodactyla	Bovidae	Tragelaphus scriptus	143
Artiodactyla	Bovidae	Tragelaphus spekii	54
Artiodactyla	Bovidae	Tragelaphus strepsiceros	63
Artiodactyla	Giraffidae	Giraffa camelopardalis	61
Artiodactyla	Giraffidae	Okapia johnstoni	3
Artiodactyla	Hippopotamidae	Hexaprotodon liberiensis	3
Artiodactyla	Hippopotimidae	Hippopotamus amphibius	89
Artiodactyla	Suidae	Hylochoerus meinertzhageni	32
Artiodactyla	Suidae	Phacochoerus aethiopicus	8
Artiodactyla	Suidae	Phacochoerus africanus	129
Artiodactyla	Suidae	Potamochoerus larvatus	79
Artiodactyla	Suidae	Potamochoerus porcus	37
Artiodactyla	Suidae	Sus scrofa	10
Artiodactyla	Tragulidae	Hyemoschus aquaticus	26
Carnivora	Canidae	Canis adustus	115
Carnivora	Canidae	Canis aureus	59
Carnivora	Canidae	Canis mesomelas	66
Carnivora	Canidae	Canis simensis	2
Carnivora	Canidae	Lycaon pictus	101
Carnivora	Canidae	Otocyon megalotis	43
Carnivora	Canidae	Vulpes cana	2
Carnivora	Canidae	Vulpes chama	12
Carnivora	Canidae	Vulpes pallida	16
Carnivora	Canidae	Vulpes rueppellii	12
Carnivora	Canidae	Vulpes vulpes	13
Carnivora	Canidae	Vulpes zerda	8
Carnivora	Felidae	Acinonyx jubatus	93
Carnivora	Felidae	Caracal caracal	133
Carnivora	Felidae	Felis chaus	4
Carnivora	Felidae	Felis margarita	9
Carnivora	Felidae	Felis nigripes	9
Carnivora	Felidae	Felis sylvestris	160
Carnivora	Felidae	Leptailurus serval	134
Carnivora	Felidae	Panthera leo	127
Carnivora	Felidae	Panthera pardus	172
Carnivora	Felidae	Profelis aurata	38
Carnivora	Herpestidae	Crossarchus alexandri	4
Carnivora	Herpestidae	Crossarchus ansorgei	1
Carnivora	Herpestidae	Galerella flavescens	6
Carnivora	Hyaenidae	Crocuta crocuta	143
Carnivora	Hyaenidae	Hyaena hyaena	60
Carnivora	Hyaenidae	Parahyaena brunnea	21
Carnivora	Hyaenidae	Proteles cristatus	48
Carnivora	Mustelidae	Aonyx capensis	106
Carnivora	Mustelidae	Aonyx congicus	23
Carnivora	Mustelidae	Ictonyx libyca	21
Carnivora	Mustelidae	Ictonyx striatus	130
Carnivora	Mustelidae	Lutra lutra	5
Carnivora	Mustelidae	Lutra maculicollis	95
Carnivora	Mustelidae	Mellivora capensis	157
Carnivora	Mustelidae	Poecilogale albinucha	44
Carnivora	Viverridae	Atilax paludinosus	125
Carnivora	Viverridae	Bdeogale crassicauda	20
Carnivora	Viverridae	Bdeogale nigripes	21
Carnivora	Viverridae	Civettictis civetta	146
Carnivora	Viverridae	Crossarchus obscurus	10
Carnivora	Viverridae	Cynictis penicillata	15
Carnivora	Viverridae	Galerella pulverulenta	4
Carnivora	Viverridae	Galerella sanguinea	127
Carnivora	Viverridae	Genetta abyssinica	1
Carnivora	Viverridae	Genetta angolensis	17
Carnivora	Viverridae	Genetta genetta	115
Carnivora	Viverridae	Genetta johnstoni	2
Carnivora	Viverridae	Genetta maculata	20
Carnivora	Viverridae	Genetta servalina	31
Carnivora	Viverridae	Genetta thierryi	22
Carnivora	Viverridae	Genetta tigrina	105
Carnivora	Viverridae	Genetta victoriae	3
Carnivora	Viverridae	Helogale parvula	57
Carnivora	Viverridae	Herpestes ichneumon	124
Carnivora	Viverridae	Herpestes naso	17
Carnivora	Viverridae	Ichneumia albicauda	112
Carnivora	Viverridae	Liberiictis kuhni	2
Carnivora	Viverridae	Mungos gambianus	8
Carnivora	Viverridae	Mungos mungo	121
Carnivora	Viverridae	Nandinia binotata	61
Carnivora	Viverridae	Paracynictis selousi	26
Carnivora	Viverridae	Poiana richardsonii	15
Carnivora	Viverridae	Rhynchogale melleri	24
Carnivora	Viverridae	Suricata suricatta	13
Eulipotyphla	Erinaceidae	Atelerix algirus	11
Hyracoidea	Procaviidae	Dendrohyrax arboreus	36
Hyracoidea	Procaviidae	Dendrohyrax dorsalis	38
Hyracoidea	Procaviidae	Heterohyrax brucei	54
Hyracoidea	Procaviidae	Procavia capensis	127
Insectivora	Erinaceidae	Atelerix albiventris	32
Insectivora	Erinaceidae	Atelerix frontalis	9
Insectivora	Tenrecidae	Potamogale velox	31
Lagomorpha	Leporidae	Lepus capensis	110
Lagomorpha	Leporidae	Lepus saxatilis	18
Lagomorpha	Leporidae	Lepus victoriae	90
Lagomorpha	Leporidae	Poelagus marjorita	17
Lagomorpha	Leporidae	Pronolagus crassicaudatus	4
Lagomorpha	Leporidae	Pronolagus randensis	11
Lagomorpha	Leporidae	Pronolagus rupestris	9
Macroscelidea	Macroscelididae	Rhynchocyon petersi	1
Perissodactyla	Equidae	Equus asinus	2
Perissodactyla	Equidae	Equus burchellii	80
Perissodactyla	Equidae	Equus grevyi	7
Perissodactyla	Equidae	Equus zebra	6
Perissodactyla	Rhinocerotidae	Ceratotherium simum	12
Perissodactyla	Rhinocerotidae	Diceros bicornis	32
Pholidota	Manidae	Manis gigantea	30
Pholidota	Manidae	Manis temminckii	62
Pholidota	Manidae	Manis tetradactyla	19
Pholidota	Manidae	Manis tricuspis	40
Primates	Cercopithecidae	Allenopithecus nigroviridis	3
Primates	Cercopithecidae	Cercocebus galeritus	12
Primates	Cercopithecidae	Cercocebus torquatus	12
Primates	Cercopithecidae	Cercopithecus ascanius	24
Primates	Cercopithecidae	Cercopithecus campbelli	5
Primates	Cercopithecidae	Cercopithecus cephus	14
Primates	Cercopithecidae	Cercopithecus diana	2
Primates	Cercopithecidae	Cercopithecus erythrogaster	1
Primates	Cercopithecidae	Cercopithecus erythrotis	9
Primates	Cercopithecidae	Cercopithecus hamlyni	2
Primates	Cercopithecidae	Cercopithecus lhoesti	5
Primates	Cercopithecidae	Cercopithecus mitis	52
Primates	Cercopithecidae	Cercopithecus mona	9
Primates	Cercopithecidae	Cercopithecus neglectus	16
Primates	Cercopithecidae	Cercopithecus nictitans	28
Primates	Cercopithecidae	Cercopithecus petaurista	6
Primates	Cercopithecidae	Cercopithecus pogonias	19
Primates	Cercopithecidae	Cercopithecus preussi	1
Primates	Cercopithecidae	Cercopithecus solatus	1
Primates	Cercopithecidae	Chlorocebus aethiops	143
Primates	Cercopithecidae	Colobus angolensis	15
Primates	Cercopithecidae	Colobus guereza	34
Primates	Cercopithecidae	Colobus polykomos	17
Primates	Cercopithecidae	Colobus satanas	4
Primates	Cercopithecidae	Colobus vellerosus	3
Primates	Cercopithecidae	Erythrocebus patas	50
Primates	Cercopithecidae	Lophocebus aterrimus	1
Primates	Cercopithecidae	Lophocebus albigena	22
Primates	Cercopithecidae	Macaca sylvanus	4
Primates	Cercopithecidae	Mandrillus leucophaeus	2
Primates	Cercopithecidae	Mandrillus sphinx	5
Primates	Cercopithecidae	Miopithecus talapoin	10
Primates	Cercopithecidae	Papio anubis	73
Primates	Cercopithecidae	Papio cynocephalus	34
Primates	Cercopithecidae	Papio hamadryas	3
Primates	Cercopithecidae	Papio papio	3
Primates	Cercopithecidae	Papio ursinus	38
Primates	Cercopithecidae	Piliocolobus badius	28
Primates	Cercopithecidae	Piliocolobus rufomitratus	2
Primates	Cercopithecidae	Procolobus verus	5
Primates	Cercopithecidae	Theropithecus gelada	1
Primates	Lorisdae	Arctocebus aureus	12
Primates	Lorisdae	Arctocebus calabarensis	5
Primates	Lorisdae	Euoticus elegantulus	18
Primates	Lorisdae	Euoticus pallidus	2
Primates	Lorisdae	Galago matschiei	1
Primates	Lorisdae	Galago moholi	61
Primates	Lorisdae	Galago senegalensis	68
Primates	Lorisdae	Galago zanzibaricus	15
Primates	Lorisdae	Galago alleni	8
Primates	Lorisdae	Galagoides thomasi	24
Primates	Lorisdae	Galagoides demidoff	35
Primates	Lorisdae	Otolemur crassicaudatus	64
Primates	Lorisdae	Otolemur garnettii	3
Primates	Lorisdae	Perodicticus potto	36
Primates	Pongidae	Gorilla gorilla	17
Primates	Pongidae	Pan paniscus	2
Primates	Pongidae	Pan troglodytes	40
Proboscidea	Elephantidae	Loxodonta africana	98
Rodentia	Hystricidae	Atherurus africanus	39
Rodentia	Hystricidae	Hystrix africaeaustralis	76
Rodentia	Hystricidae	Hystrix cristata	104
Rodentia	Muridae	Cricetomys emini	7
Rodentia	Muridae	Cricetomys gambianus	18
Rodentia	Pedetidae	Pedetes capensis	46
Rodentia	Sciuridae	Protoxerus stangeri	2
Rodentia	Thryonomidae	Thryonomys swinderianus	27
Tubulidentata	Orycteropodidae	Orycteropus afer	138
